# Supplementary material
Source: publisher figshare collection journal article supplement (https://acs.figshare.com/ndownloader/files/21312594)
Supplement: Supplementary file 1 [file 21312594]

## Supporting Information

### Deuteration of Formyl Groups via a Catalytic Radical H/D Exchange Approach

Yueteng Zhang, Peng Ji, Yue Dong, Yongyi Wei, and Wei Wang\*

Department of Pharmacology and Toxicology, College of Pharmacy, and BIO5 Institute, University of Arizona, 1703 E. Mabel Street, Tucson, AZ 85721-0207, USA

Email: wwang@pharmacy.arizona.edu

#### Table of Contents

|                                                                                                               |           |
|---------------------------------------------------------------------------------------------------------------|-----------|
| <b>Supporting Information .....</b>                                                                           | <b>1</b>  |
| <b>1. General information .....</b>                                                                           | <b>2</b>  |
| <b>2. General procedure and optimization of reaction conditions .....</b>                                     | <b>2</b>  |
| <b>3. Preparation of aldehyde substrates 1.....</b>                                                           | <b>3</b>  |
| <b>4. Reused D<sub>2</sub>O in deuteration reaction of 4-methylbenzaldehyde and gram scale synthesis.....</b> | <b>9</b>  |
| <b>5. Table S2. Cost calculation for the synthesis of 1.0 g 4-Methylbenzaldehyde-<i>formyl-d</i>11.....</b>   | <b>11</b> |
| <b>6. Acyl radical intermediate trapping experiment .....</b>                                                 | <b>11</b> |
| <b>7. Observed side reaction .....</b>                                                                        | <b>11</b> |
| <b>8. General procedure and characterization data for compounds 3.....</b>                                    | <b>12</b> |
| <b>9. Reference.....</b>                                                                                      | <b>76</b> |

## 1. General information

Commercially available reagents were purchased from Sigma Aldrich, Matrix Chemical, AKSci, Alfa Aesar, Acros, AmBeed or TCI, and used as received unless otherwise noted. Merck 60 silica gel was used for chromatography, and Whatman silica gel plates with a fluorescence F254 indicator were used for thin-layer chromatography (TLC) analysis.  $^1\text{H}$  and  $^{13}\text{C}$  NMR spectra were recorded on Bruker Avance 500 MHz or Varian 400 MHz. Chemical shifts in  $^1\text{H}$  NMR spectra are reported in parts permillion (ppm) relative to residual chloroform (7.26 ppm) or dimethyl sulfoxide (2.50 ppm) as internal standards.  $^1\text{H}$  NMR data are reported as follows: chemical shift, multiplicity (s = singlet, d = doublet, quint = quintet, sext = sextet, m = multiplet, br = broad), coupling constant in Hertz (Hz) and hydrogen numbers based on integration intensities.  $^{13}\text{C}$  NMR chemical shifts are reported in ppm relative to the central peak of  $\text{CDCl}_3$  (77.16 ppm) or  $(\text{CD}_3)_2\text{SO}$  (39.52 ppm) as internal standards. Low-resolution mass spectrometry was performed in Analytical and Biological Mass Spectrometry Center. Both blue LED strip and 34 W Kessil Blue LEDs were purchased from Amazon.

## 2. General procedure and optimization of reaction conditions

Photocatalyst 4CzIPN was synthesized according to reported procedure.<sup>1</sup>

**General procedure:** To an oven-dried 10 mL-Schlenk tube equipped with a stir bar, was added aldehyde (0.2 mmol, 1.0 equiv), photocatalyst 4CzIPN (8 mg, 5 mol%), indicated reagents and 1 mL anhydrous solvents. The mixture was degassed by freeze-pump-thaw method, then sealed with parafilm. The solution was then stirred at room temperature under the irradiation of a blue LED strip for indicated time. After completion of the reaction, the mixture was concentrated. The yield and deuteration ratio were determined by  $^1\text{H}$  NMR.

**Table S1. Optimization of reaction conditions**

| 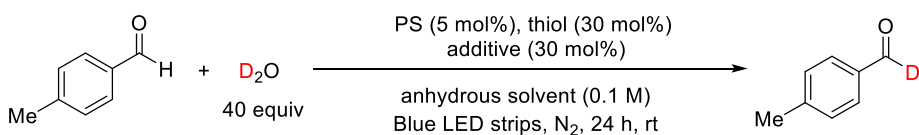 |                      |                     |                          |         |       |       |
|--------------------------------------------------------------------------------------|----------------------|---------------------|--------------------------|---------|-------|-------|
|  |                      |                     |                          |         |       |       |
| entry                                                                                | PS                   | thiol (30 mol%)     | additive (30 mol%)       | solvent | y (%) | D (%) |
| 1                                                                                    | <b>2a</b>            | BnSH                | -                        | MeCN    | 94    | <5    |
| 2                                                                                    | 4CzIPN               | BnSH                | -                        | MeCN    | 92    | 30    |
| 3                                                                                    | 4CzIPN               | Benzenethiol        | -                        | MeCN    | 95    | <5    |
| 4                                                                                    | 4CzIPN               | 4-Nitrobenzenethiol | -                        | MeCN    | 94    | <5    |
| 5                                                                                    | 4CzIPN               | BnSSBn              | -                        | MeCN    | 93    | 25    |
| 6                                                                                    | 4CzIPN               | BnSH                | $\text{Na}_2\text{CO}_3$ | MeCN    | 90    | <5    |
| 7                                                                                    | 4CzIPN               | <b>2b</b>           | -                        | MeCN    | 90    | 40    |
| 8                                                                                    | 4CzIPN               | <b>2c</b>           | -                        | MeCN    | 90    | 33    |
| 9                                                                                    | Eosin Y              | <b>2b</b>           | -                        | MeCN    | 93    | <5    |
| 10                                                                                   | Rhodamine B          | <b>2b</b>           | -                        | MeCN    | 95    | <5    |
| 11                                                                                   | Phenylglyoxylic acid | <b>2b</b>           | -                        | MeCN    | 92    | <5    |

|                 |                          |           |                                                                                   |                   |    |    |
|-----------------|--------------------------|-----------|-----------------------------------------------------------------------------------|-------------------|----|----|
| 12              | 9,10-Phenanthrenequinone | <b>2b</b> |                                                                                   | MeCN              | 94 | <5 |
| 13              | Methylene Blue           | <b>2b</b> | -                                                                                 | MeCN              | 93 | 30 |
| 14              | 4CzIPN                   | <b>2b</b> | 2,6-Lutidine                                                                      | MeCN              | 89 | 33 |
| 15              | 4CzIPN                   | <b>2b</b> |  | MeCN              | 92 | 36 |
| 16              | 4CzIPN                   | <b>2b</b> |  | MeCN              | 91 | 19 |
| 17              | 4CzIPN                   | <b>2b</b> |  | MeCN              | 92 | 15 |
| 18              | 4CzIPN                   | <b>2b</b> | Pyridine                                                                          | MeCN              | 90 | 26 |
| 19              | 4CzIPN                   | <b>2b</b> | DMAP                                                                              | MeCN              | 91 | 12 |
| 20              | 4CzIPN                   | <b>2b</b> | Quinoline                                                                         | MeCN              | 88 | 14 |
| 21              | 4CzIPN                   | <b>2b</b> | Sodium dodecyl sulfate                                                            | MeCN              | 88 | 40 |
| 22              | 4CzIPN                   | <b>2b</b> | PhCO <sub>2</sub> Na                                                              | MeCN              | 93 | 53 |
| 23              | 4CzIPN                   | <b>2b</b> | PhCO <sub>2</sub> Na                                                              | DMF               | 93 | <5 |
| 24              | 4CzIPN                   | <b>2b</b> | PhCO <sub>2</sub> Na                                                              | PhCF <sub>3</sub> | 96 | <5 |
| 25              | 4CzIPN                   | <b>2b</b> | PhCO <sub>2</sub> Na                                                              | Acetone           | 97 | 40 |
| 26              | 4CzIPN                   | <b>2b</b> | PhCO <sub>2</sub> Na                                                              | THF               | 94 | <5 |
| 27              | 4CzIPN                   | <b>2b</b> | PhCO <sub>2</sub> Na                                                              | EtOAc             | 94 | 65 |
| 28 <sup>a</sup> | 4CzIPN                   | <b>2b</b> | PhCO <sub>2</sub> Na                                                              | EtOAc             | 92 | 79 |
| 29 <sup>b</sup> | 4CzIPN                   | <b>2b</b> | PhCO <sub>2</sub> Na                                                              | EtOAc             | 96 | 85 |
| 30 <sup>c</sup> | 4CzIPN                   | <b>2b</b> | PhCO <sub>2</sub> Na                                                              | EtOAc             | 95 | 95 |
| 31              | 4CzIPN                   | <b>2d</b> | PhCO <sub>2</sub> Na                                                              | EtOAc             | 95 | 97 |
| 31 <sup>e</sup> | 4CzIPN                   | <b>2d</b> | PhCO <sub>2</sub> Na                                                              | EtOAc             | 94 | 72 |
| 31 <sup>f</sup> | 4CzIPN                   | <b>2d</b> | PhCO <sub>2</sub> Na                                                              | EtOAc             | 95 | 93 |

<sup>a</sup>Reaction time: 40h; <sup>b</sup>Reaction time: 48h; <sup>c</sup>Reaction time 72h; <sup>d</sup>Isolated yield; <sup>e</sup> Reaction time 10h; <sup>f</sup> Reaction time 20h. Y: yield; D: deuteration ratio.

### 3. Preparation of aldehyde substrates 1.

#### 3.1 General procedure for the synthesis of compound (1v, 1y, 1ab)

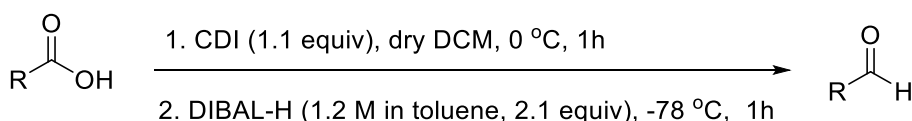

**General procedure:** To a dried 10 mL Schlenk tube was added acid (1 mmol, 1.0 equiv) and capped with rubber stopper. The tube is purged with N<sub>2</sub> and protected by N<sub>2</sub> in balloon. 5 mL anhydrous DCM was added under N<sub>2</sub>. The solution was cooled to 0 °C (ice bath) and 178mg (1.1 mmol, 1.1 eq) 1,1'-carbonyldiimidazole (CDI) were added. After stirring for 60 min, the colorless reaction solution was cooled to -78 °C (dry ice/acetone bath) for 15 min. Subsequently, 1.75 mL (2.1 mmol, 2.1 eq) DIBAL-H solution (1.2 M in toluene) were added dropwise with a syringe throughout 10 min. The reaction mixture was stirred at -78 °C for 1h. The reaction mixture was quenched by the addition of 2mL EtOAc followed by 5 mL tartaric acid solution (25 % in H<sub>2</sub>O) under vigorous stirring. The mixture was warmed up to RT and stirred vigorously for 15 min. The mixture was extracted with EtOAc (3 x 10 mL) and the combined organic extracts were washed with 1 M HCl (1 x 10 mL), saturated NaHCO<sub>3</sub> (1 x 10 mL) and brine (1 x 10 mL), dried over Na<sub>2</sub>SO<sub>4</sub>, filtered and concentrated under reduced pressure. The crude product purified by flash chromatography on silica gel.

#### Preparation of 3-(benzo[d][1,3]dioxol-5-yl)propanal (1v)<sup>2</sup>

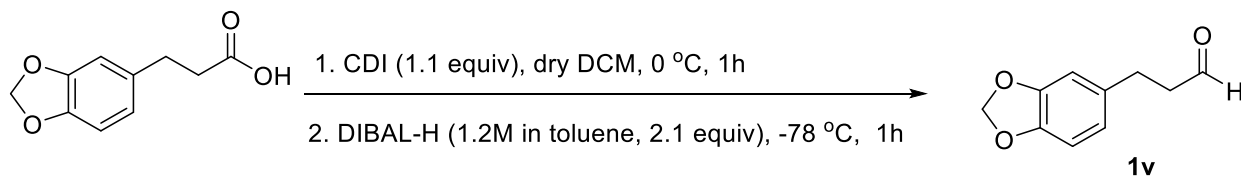

This substrate was synthesized following the *general procedure*. The crude product was purified by flash chromatography on silica gel (acetone/hexane = 1/9) to afford product (139 mg, 78% yield) as colorless oil. <sup>1</sup>H NMR (400 MHz, CDCl<sub>3</sub>) δ 9.79 (1H, t, *J* = 1.2 Hz), 6.72 (1H, d, *J* = 7.8 Hz), 6.67 (d, *J* = 1.5 Hz, 1H), 6.63 (dd, *J* = 7.9, 1.4 Hz, 1H), 5.91 (s, 2H), 2.87 (2H, t, *J* = 7.4 Hz), 2.72 (t, *J* = 7.3 Hz, 2H); <sup>13</sup>C NMR (100 MHz, CDCl<sub>3</sub>) δ 201.32, 147.88, 146.04, 134.15, 121.15, 108.83, 108.36, 101.10, 45.55, 28.01.

### Preparation of 2,3-dihydro-1*H*-indene-2-carbaldehyde (**1y**)<sup>3</sup>

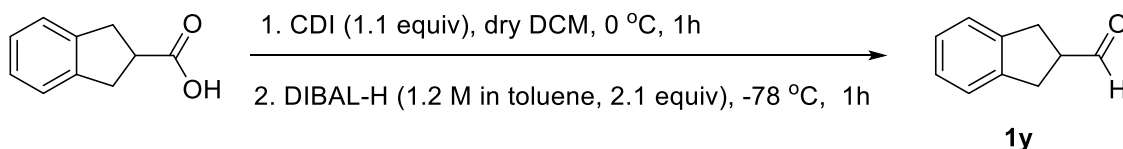

This substrate was synthesized following the *general procedure*. The crude product was purified by flash chromatography on silica gel (Et<sub>2</sub>O/hexane = 1/19) to afford product (112 mg, 77% yield) as colorless oil. <sup>1</sup>H NMR (400 MHz, CDCl<sub>3</sub>) δ 9.78 (d, *J* = 1.3 Hz, 1H), 7.25 (dd, *J* = 5.3, 3.5 Hz, 2H), 7.18 (dd, *J* = 5.4, 3.3 Hz, 2H), 3.35–3.25 (m, 3H), 3.23–3.16 (m, 2H). <sup>13</sup>C NMR (100 MHz, CDCl<sub>3</sub>) δ 202.84, 141.17, 126.86, 124.68, 50.70, 32.99.

### Preparation of *tert*-butyl (3-oxopropyl)carbamate (**1ab**)<sup>4</sup>

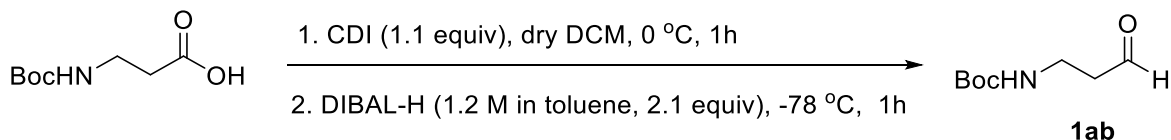

This substrate was synthesized following the *general procedure*. The crude product was purified by flash chromatography on silica gel (EtOAc/hexane = 1/3) to afford product (151 mg, 87% yield) as colorless oil. <sup>1</sup>H NMR (400 MHz, CDCl<sub>3</sub>) δ 9.70 (s, 1H), 5.05 (br, 1H), 3.32 (q, *J* = 6.0 Hz, 2H), 2.60 (t, *J* = 5.9 Hz, 2H), 1.32 (s, 9H). <sup>13</sup>C NMR (100 MHz, CDCl<sub>3</sub>) δ 201.43, 155.83, 79.25, 44.22, 34.02, 28.29.

### 3.2 Preparation of 4-oxo-4-phenylbutanal (**1ac**)<sup>5</sup>

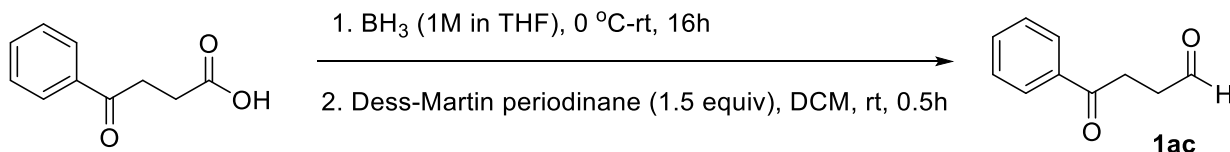

At 0 °C, to the solution of 4-oxo-4-phenylbutanoic acid (356 mg, 2 mmol, 1.0 equiv) in anhydrous THF 5 mL was added BH<sub>3</sub> (1M in THF, 6 mL, 6 mmol, 3.0 equiv) dropwise for 10 min. The reaction was warmed up to room temperature and stirred for 16h. After the completion of reaction, the solvent was removed under vacuum. To the crude mixture was added DCM 5 mL followed by 1.3g (3 mmol, 1.5 equiv) Dess-Martin periodinane, the reaction was stirred at room temperature for 0.5 h indicated by TLC. 5 mL Saturated sodium thiosulfate solution was added to flask to quench reaction and followed by 5 mL saturated NaHCO<sub>3</sub> solution. The mixture was stirred for 15 min till it turns to be clear. The reaction was extracted with DCM (3 x 10 mL) and the combined organic extracts were washed with brine (1 x 10 mL), dried over Na<sub>2</sub>SO<sub>4</sub>, filtered and concentrated under reduced pressure. The crude product was purified by flash chromatography on silica gel (EtOAc/hexane = 1/2) to afford product 194 mg (60% yield for two steps) as colorless oil. <sup>1</sup>H NMR

(400 MHz, CDCl<sub>3</sub>)  $\delta$  9.91 (s, 1H), 7.99 (d,  $J$  = 7.4 Hz, 2H), 7.58 (t,  $J$  = 7.4 Hz, 1H), 7.47 (t,  $J$  = 7.7 Hz, 2H), 3.33 (t,  $J$  = 6.3 Hz, 2H), 2.94 (t,  $J$  = 6.3 Hz, 2H). <sup>13</sup>C NMR (100 MHz, CDCl<sub>3</sub>)  $\delta$  200.75, 197.94, 136.56, 133.47, 128.79, 128.21, 37.76, 31.16.

### 3.3 Synthesis of benzyl 4-oxobutanoate (1ad)

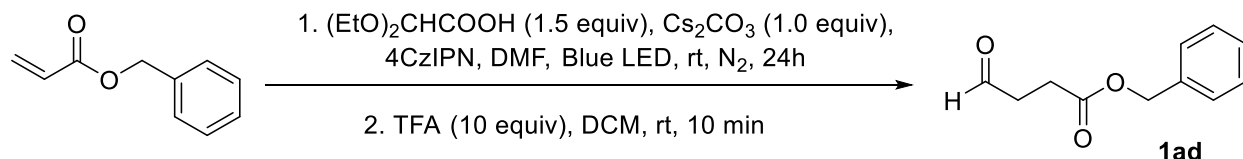

To an oven-dried 10 mL-Schlenk tube equipped with a stir bar, was added benzyl acrylate (162mg, 1.0 mmol, 1.0 equiv), 2,2-diethoxyacetic acid (222mg, 1.5 mmol, 1.5 equiv), photocatalyst 4CzIPN (40mg, 5 mol%), Cs<sub>2</sub>CO<sub>3</sub> (325mg, 1 mmol, 1.0 equiv), DMF (5 mL, 0.2M). The mixture was degassed by freeze-pump-thaw method, then sealed with parafilm. The solution was then stirred at room temperature under the irradiation of a blue LED strip for 24h. After completion of the reaction, the mixture was diluted by adding 10 ml EtOAc and 30 ml water. The reaction was extracted with EtOA (3 x 10 mL) and the combined organic extracts were washed with brine (1 x 10 mL), dried over Na<sub>2</sub>SO<sub>4</sub>, filtered and concentrated under reduced pressure. 5 ml DCM was added to crude residue followed by 0.75 mL TFA (10 equiv). The reaction mixture was stirred at room temperature for 10 min. 10 mL saturated NaHCO<sub>3</sub> solution was added slowly to quench the reaction. The reaction mixture was extracted with DCM (3 x 10 mL) and the combined organic extracts were washed with brine (1 x 10 mL), dried over Na<sub>2</sub>SO<sub>4</sub>, filtered and concentrated under reduced pressure. The crude product was purified by flash chromatography on silica gel (acetone/hexane = 1/4) to afford product 163 mg (85% yield for two steps) as colorless oil. <sup>1</sup>H NMR (400 MHz, CDCl<sub>3</sub>)  $\delta$  9.79 (s, 1H), 7.34 (s, 5H), 5.13 (s, 2H), 2.79 (t,  $J$  = 6.1 Hz, 2H), 2.67 (t,  $J$  = 6.5 Hz, 2H). <sup>13</sup>C NMR (100 MHz, CDCl<sub>3</sub>)  $\delta$  199.95, 172.11, 135.77, 128.60, 128.60, 128.32, 128.23, 66.63, 38.50, 26.61.

### 3.4 General procedure for the synthesis of substrates (1ae, 1aj, 1ak)

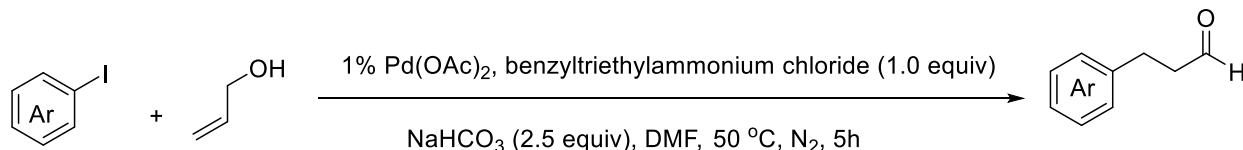

To a 25 mL Schlenk tube equipped with a stir bar was added with substituted iodobenzene (2.0 mmol, 1.0 equiv), Pd(OAc)<sub>2</sub> (4.5 mg, 0.02 mmol, 1 mol%), benzyltriethylammonium chloride (454mg, 2 mmol, 1.0 equiv), NaHCO<sub>3</sub> (420 mg, 5 mmol, 2.5 equiv), allyl alcohol (174mg, 1.5 equiv) and DMF (6.0 mL). The mixture was degassed by freeze-pump-thaw method, then sealed with parafilm. The reaction mixture was stirred at 50 °C for 5 h. Upon cooling to room temperature, the reaction mixture was filtrated through a pad of celite, washed with 50 mL of ethyl acetate and washed with brine (2\*10.0 mL). The organic layer was separated, dried over anhydrous Na<sub>2</sub>SO<sub>4</sub> and concentrated under reduced pressure. The residue was purified by flash chromatography on silica gel to provide the corresponding products.

#### Synthesis of 4-(3-oxopropyl)benzonitrile (1ae)<sup>6</sup>

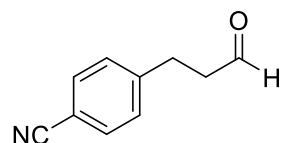

This substrate was synthesized following the *general procedure*. The crude product was purified by flash chromatography on silica gel (EtOAc/hexane = 1/3) to afford product (277 mg, 87% yield) as colorless oil. <sup>1</sup>H NMR (400 MHz, CDCl<sub>3</sub>)  $\delta$  9.76 (s, 1H), 7.52 (d,  $J$  = 7.5 Hz, 2H), 7.27 (d,  $J$  = 7.5 Hz, 2H), 2.96 (t,  $J$  = 7.0 Hz, 2H), 2.78 (t,  $J$  = 7.0 Hz, 2H). <sup>13</sup>C NMR (100 MHz, CDCl<sub>3</sub>)  $\delta$  200.36, 146.16, 132.34, 129.23, 118.87, 110.16, 44.47, 28.02.

### Synthesis of 3-(thiophen-2-yl)propanal (1aj)<sup>7</sup>

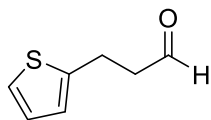

This substrate was synthesized following the *general procedure*. The crude product was purified by flash chromatography on silica gel (EtOAc/hexane = 1/9) to afford product (255 mg, 91% yield) as orange oil. <sup>1</sup>H NMR (400 MHz, CDCl<sub>3</sub>) δ 9.81 (s, 1H), 7.13 (d, *J* = 4.9 Hz, 1H), 6.92 (s, 1H), 6.82 (s, 1H), 3.18 (t, *J* = 7.3 Hz, 2H), 2.83 (t, *J* = 7.2 Hz, 2H).

### Synthesis of 3-(2,4-dimethoxypyrimidin-5-yl)propanal (1ak)

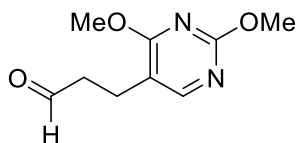

This substrate was synthesized following the *general procedure*. The crude product purified by flash chromatography on silica gel (EtOAc/hexane = 1/1) to afford product (353 mg, 90% yield) as pale yellow oil. <sup>1</sup>H NMR (400 MHz, CDCl<sub>3</sub>) δ 9.77 (s, 1H), 8.01 (s, 1H), 3.96 (s, 3H), 3.93 (s, 3H), 2.76 (t, *J* = 6.4 Hz, 2H), 2.68 (t, *J* = 6.4 Hz, 2H). <sup>13</sup>C NMR (100 MHz, CDCl<sub>3</sub>) δ 201.19, 169.35, 164.46, 157.33, 113.51, 54.77, 54.75, 53.99, 53.97, 42.98, 19.59.

### 3.5 Synthesis of 4-formylphenyl 2-(1-(4-chlorobenzoyl)-5-methoxy-2-methyl-1*H*-indol-3-yl)acetate (1ap)

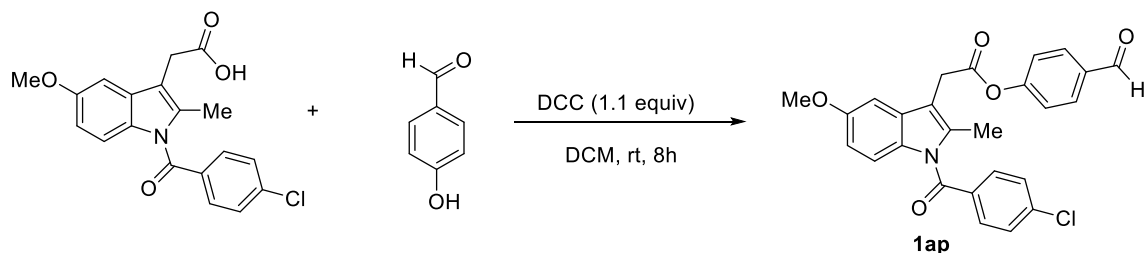

At 0 °C, to the solution of indomethacin (357 mg, 1 mmol, 1.0 equiv) in 5 ml DCM was added 4-hydroxybenzaldehyde (122mg, 1 mmol, 1.0 equiv) and *N,N*-dicyclohexylcarbodiimide (206mg, 1 mmol, 1.0 equiv). The reaction mixture was warmed up to room temperature and stirred for 8 hours. After the completion of the reaction, the mixture was filtrated through a pad of celite, washed with 20 mL DCM. The filtra was concentrated and purified by flash chromatography on silica gel (EtOAc/hexane = 1/3) to afford product (322 mg, 70% yield) as white solid. <sup>1</sup>H NMR (400 MHz, CDCl<sub>3</sub>) δ 9.98 (s, 1H), 7.90 (d, *J* = 8.5 Hz, 2H), 7.68 (d, *J* = 8.3 Hz, 2H), 7.48 (d, *J* = 8.3 Hz, 2H), 7.25 (d, *J* = 8.4 Hz, 2H), 7.04 (d, *J* = 2.5 Hz, 1H), 6.88 (d, *J* = 9.0 Hz, 1H), 6.70 (dd, *J* = 9.0, 2.5 Hz, 1H), 3.94 (s, 2H), 3.84 (s, 3H), 2.47 (s, 3H). <sup>13</sup>C NMR (100 MHz, CDCl<sub>3</sub>) δ 190.65, 168.74, 168.43, 156.30, 155.46, 139.61, 136.56, 134.16, 133.85, 131.36, 131.34, 131.00, 130.50, 129.33, 122.36, 115.22, 111.91, 111.59, 101.35, 55.90, 30.74, 13.56.

### 3.6 Synthesis of (3aR,4R,6S,6aS)-6-methoxy-2,2-dimethyl-*N*-(3-oxopropyl-3-*d*)tetrahydrofuro[3,4-*d*][1,3]dioxole-4-carboxamide (1aq)

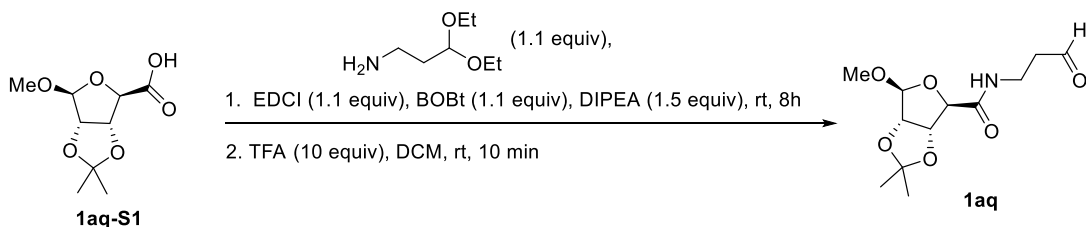

At 0 °C, to a solution of (3*aR*,4*R*,6*S*,6*aS*)-6-methoxy-2,2-dimethyl-*N*-(3-oxopropyl-3-d)tetrahydrofuro[3,4-*d*][1,3]dioxole-4-carboxamide (**1aq-S1**, prepared from reported procedure<sup>8</sup>, 218mg, 1mmol, 1.0 equiv) in 10 mL DCM was added EDCI (170 mg, 1.1 mmol, 1.1 equiv), HOBt (149 mg, 1.1 mmol, 1.1 equiv), DIPEA (193 mg, 1.5 mmol, 1.5 equiv) and 3,3-diethoxypropan-1-amine (162 mg, 1.1 mmol). The reaction mixture was warmed up to room temperature and stirred for 8 hours. After the completion of the reaction, the mixture was diluted with 20 mL DCM. The solution was washed by 1M HCl (aq) (10 ml), saturated NaHCO<sub>3</sub> (10 ml) and brine (10 ml). The organic layer was dried over anhydrous Na<sub>2</sub>SO<sub>4</sub> and concentrated under reduced pressure. The residue was purified by flash chromatography (EtOAc/hexane = 1/1) on silica gel to provide the corresponding products 249 mg (91% yield for two steps) as colorless oil. <sup>1</sup>H NMR (400 MHz, CDCl<sub>3</sub>) δ 9.76 (s, 1H), 6.98 (br, 1H), 5.01 (d, *J* = 10.3 Hz, 2H), 4.52-4.47 (m, 2H), 3.52 (dd, *J* = 11.6, 5.7 Hz, 2H), 3.41 (s, 3H), 2.81 (s, 1H), 2.69 (t, *J* = 5.5 Hz, 2H), 1.43 (s, 3H), 1.27 (s, 3H). <sup>13</sup>C NMR (100 MHz, CDCl<sub>3</sub>) δ 201.02, 170.35, 112.78, 111.50, 111.46, 86.49, 84.46, 82.61, 82.60, 56.54, 55.52, 43.72, 32.50, 26.50, 24.98.

### 3.7 Synthesis of methyl *N*<sup>a</sup>-((benzyloxy)carbonyl)-1-(4-oxobutanoyl)-*L*-tryptophanate (**1ar**)

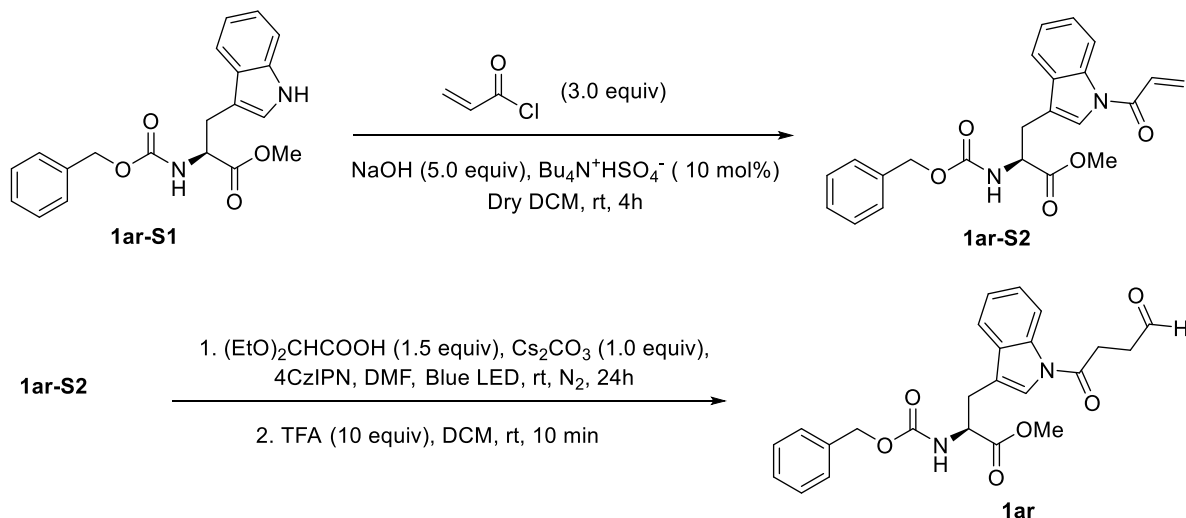

To a solution of Boc-L-Trp-OMe (**1ar-S1**, prepared according to reported procedure<sup>9</sup>, 2.4 mmol, 1.0 equiv) in dry 10 mL DCM was added tetrabutylammonium hydrogen sulfate (81mg, 0.24 mmol, 10 mol%), powdered NaOH (480 mg, 12.0 mmol, 5.0 equiv). After stirring of reaction mixture for 15 min at room temperature, acryloyl chloride (648 mg, 7.2 mmol, 3.0 equiv) was added to flask. The reaction mixture was stirred at room temperature for 4h. After the completion of the reaction, the mixture was diluted with 20 mL DCM. The solution was washed by water (10 ml), saturated brine (10 ml). The organic layer was dried over anhydrous Na<sub>2</sub>SO<sub>4</sub> and concentrated under reduced pressure. The residue was purified by flash chromatography (EtOAc/hexane = 2/3) on silica gel to provide the corresponding products **1ar-S2** (780 mg, 80% yield) as white solid. <sup>1</sup>H NMR (400 MHz, CDCl<sub>3</sub>) δ 8.48 (d, *J* = 8.2 Hz, 1H), 7.48 (d, *J* = 7.5 Hz, 1H), 7.39-7.26 (m, 8H), 6.86 (dd, *J* = 16.7, 10.4 Hz, 1H), 6.64 (d, *J* = 16.7 Hz, 1H), 6.00 (d, *J* = 10.3 Hz, 1H), 5.44 (s, 1H), 5.12 (dd, *J* = 32.0, 12.1 Hz, 2H), 4.77 (d, *J* = 6.3 Hz, 1H), 3.69 (s, 3H), 3.26 (dt, *J* = 14.4, 9.7 Hz, 2H). <sup>13</sup>C NMR (100 MHz, CDCl<sub>3</sub>) δ 172.05, 163.69, 155.82, 136.27, 136.09, 132.19, 130.69, 128.67, 128.67, 128.39, 128.22, 127.97, 125.62, 124.05, 122.88, 118.84, 117.20, 117.08, 67.18, 53.93, 53.89, 52.93, 52.70, 52.65, 28.14.

To an oven-dried 10 mL-Schlenk tube equipped with a stir bar, was added **1ar-S2** (406 mg, 1mmol, 1.0 equiv), 2,2-diethoxyacetic acid (222mg, 1.5 mmol, 1.5 equiv), photocatalyst 4CzIPN (40mg, 5 mol%), Cs<sub>2</sub>CO<sub>3</sub> (325mg, 1 mmol, 1.0 equiv) and DMF (5 mL). The mixture was degassed by freeze-pump-thaw method, then sealed with parafilm. The solution was then stirred at room temperature under the irradiation of a blue LED strip for 24h. After completion of the reaction, the mixture was diluted by adding 10 ml EA and 30 ml water. The reaction was extracted with EtOAc (3 x 10 mL) and the combined organic extracts were washed with brine (1 x 10 mL), dried over Na<sub>2</sub>SO<sub>4</sub>, filtered and concentrated under reduced pressure. 5 ml DCM was added to flask followed by 0.75 mL TFA (10 equiv). The reaction mixture was stirred at room temperature for 10 min. 10 mL saturated NaHCO<sub>3</sub> solution was added slowly to quench the reaction. The reaction was extracted with DCM (3 x 10 mL) and the combined organic extracts were washed with brine (1 x 10 mL), dried over Na<sub>2</sub>SO<sub>4</sub>, filtered and concentrated under reduced pressure. The crude product purified by flash chromatography on silica gel (EtOAc/hexane/DCM = 1/2/2) to afford product 349 mg (80% yield for two steps) as pale yellow oil. <sup>1</sup>H NMR (400 MHz, CDCl<sub>3</sub>) δ 9.86 (s, 1H), 8.35 (d, *J* = 8.0 Hz, 1H), 7.45 (d, *J* = 7.5 Hz, 1H), 7.33-7.21 (m, 8H), 5.48 (d, *J* = 7.0 Hz, 1H), 5.09 (dd, *J* = 30.5, 12.2 Hz, 2H), 4.75 (d, *J* = 6.3 Hz, 1H), 3.68 (s, 3H), 3.29-3.15 (m, 2H), 3.10 (t, *J* = 5.6 Hz, 2H), 2.93 (t, *J* = 5.7 Hz, 2H). <sup>13</sup>C NMR (100 MHz, CDCl<sub>3</sub>) δ 199.97, 172.04, 169.42, 155.82, 136.29, 135.87, 130.38, 128.61, 128.30, 128.17, 125.65, 123.82, 122.67, 118.82, 117.36, 116.70, 67.11, 53.87, 52.68, 52.63, 37.85, 28.24, 28.08.

### 3.8 Synthesis of *tert*-butyl (S)-(1-oxo-1-((2-oxo-2-((3-oxopropyl)amino)ethyl)amino)-3-phenylpropan-2-yl)carbamate (**1as**)

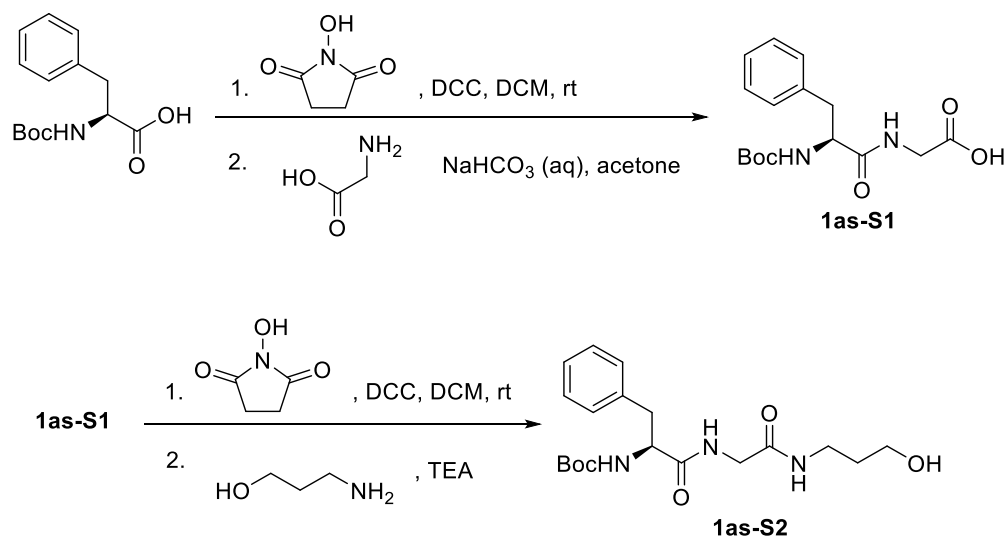

To a solution of Boc-*L*-phenylalanine (796 mg, 3 mmol, 1.0 equiv) in 10 mL DCM was added *N*-hydroxysuccinimide (380 mg, 3.3 mmol, 1.1 equiv) and DCC (680 mg, 3.3 mmol, 1.1 equiv). The reaction mixture was stirred at RT for 8 h, after which the reaction mixture was filtrated through a pad of celite and washed by DCM (2 x 10 mL). The filtra was concentrated under vacuum. To the residue in flask was added acetone (10 mL), glycine (248 mg, 3.3 mmol, 1.1 equiv) and 5 mL saturated NaHCO<sub>3</sub>. After the reaction mixture was stirred at room temperature for 5h, 20 mL water was added to flask. The reaction mixture was extracted by EtOAc (3 x 10 mL). To the aqueous solution was slowly added 2M HCl to pH = 3-4. The acidified solution was extracted by EtOAc (3 x 10 mL). The combined organic layer was dried over Na<sub>2</sub>SO<sub>4</sub>, filtrated and concentrated under vacuum to afford crude **1as-S1** (900mg). To a solution of **1as-S1** in 10 mL DCM was added *N*-hydroxysuccinimide (380 mg, 3.3 mmol) and DCC (680 mg, 3.3 mmol). The reaction mixture was stirred at RT for 8 h, after which the reaction mixture was filtrated through a pad of celite and washed by DCM (2 x 10 mL). To the filtra solution was added 3-aminopropan-1-ol (225 mg, 3 mmol) and TEA (61mg, 0.6 mmol), the reaction mixture was stirred at room temperature for 5h. After the reaction was completed, the reaction is concentrated and by flash chromatography on silica gel (EtOAc/MeOH = 9/1) to afford white foam solid (728 mg, 63% yield for 4 steps). <sup>1</sup>H NMR (400 MHz, CD<sub>3</sub>OD) δ 7.77 (s, 1H), 7.36–7.21 (m, 5H), 6.82 (d, *J* = 6.3 Hz, 1H), 4.27 (d, *J* = 6.6 Hz, 1H), 3.91 (d, *J* = 16.8 Hz, 1H), 3.70 (d, *J* = 16.8



Hz, 1H), 3.61 (t,  $J = 6.1$  Hz, 2H), 3.35-3.29 (m, 2H), 3.17-3.12 (m, 1H), 2.92 (dd,  $J = 13.3, 9.0$  Hz, 1H), 1.75 (quint,  $J = 6.4$  Hz, 2H), 1.41 (s, 9H).  $^{13}\text{C}$  NMR (100 MHz,  $\text{CD}_3\text{OD}$ )  $\delta$  174.74, 174.69, 171.46, 171.38, 157.79, 138.18, 130.14, 129.32, 127.64, 80.76, 60.19, 57.84, 57.75, 43.46, 43.43, 38.48, 38.45, 37.44, 37.31, 32.92, 28.65.

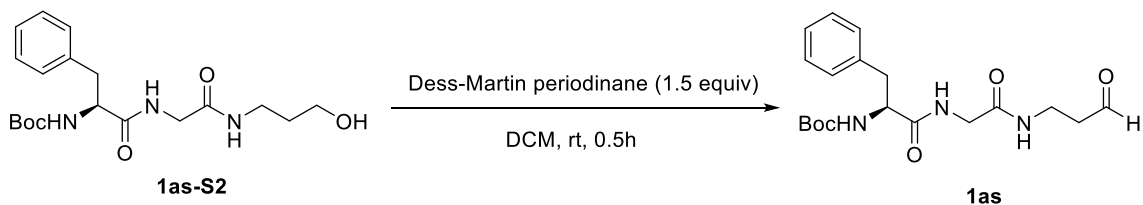

To a solution of **1as-S2** (200mg, 0.52 mmol, 1.0 equiv) in 3 mL DCM was added Dess-Martin periodinane (331mg, 0.78 mmol, 1.5 equiv), the reaction was stirred at room temperature for 0.5 h indicated by TLC. 5 mL Saturated sodium thiosulfate solution was added to flask to quench reaction and followed by 5 mL saturated  $\text{NaHCO}_3$  solution. The mixture was stirred for 15 min till it turns to be clear. The reaction was extracted with DCM (3 x 10 mL) and the combined organic extracts were washed with brine (1 x 10 mL), dried over  $\text{Na}_2\text{SO}_4$ , filtered and concentrated under reduced pressure. The crude product was purified by flash chromatography on silica gel ( $\text{EtOAc/MeOH} = 9/1$ ) to afford product (147mg, 75% yield) as white foam solid.  $^1\text{H}$  NMR (400 MHz,  $\text{CDCl}_3$ )  $\delta$  9.67 (s, 1H), 7.38 (t,  $J = 5.6$  Hz), 7.27–7.13 (m, 5H), 5.51 (d,  $J = 6.0$  Hz, 1H), 4.34 (d,  $J = 6.7$  Hz, 1H), 3.88 (dd,  $J = 16.7, 5.7$  Hz, 1H), 3.75 (dd,  $J = 16.7, 5.7$  Hz, 1H), 3.50-3.41 (m, 2H), 3.09 (dd,  $J = 13.7, 5.8$  Hz, 1H), 2.91 (dd,  $J = 13.1, 8.2$  Hz, 1H), 2.62 (t,  $J = 6.1$  Hz, 2H), 1.32 (s, 9H).  $^{13}\text{C}$  NMR (100 MHz,  $\text{CDCl}_3$ )  $\delta$  201.19, 172.41, 169.28, 155.82, 136.61, 129.21, 128.54, 80.21, 56.09, 43.42, 43.00, 38.13, 33.08, 28.23.

#### 4. Reused $\text{D}_2\text{O}$ in deuteration reaction of 4-methylbenzaldehyde and gram scale synthesis Procedure for deuteration in 1<sup>st</sup> batch

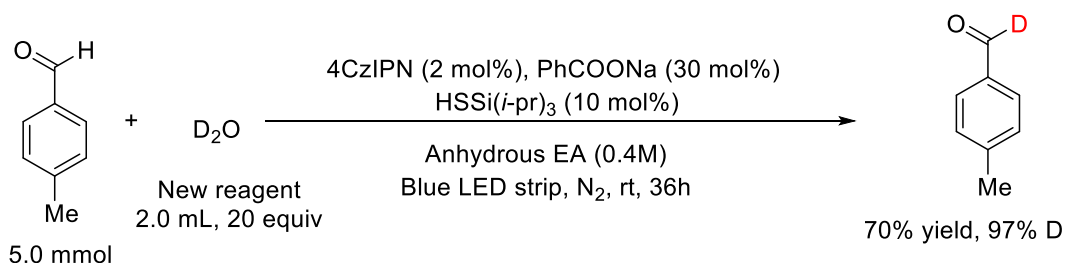

To an oven-dried 25 mL-Schlenk tube equipped with a stir bar, was added 4-methylbenzaldehyde (600 mg, 5.0 mmol, 1.0 equiv), photocatalyst 4CzIPN (80 mg, 2 mol%),  $\text{PhCOONa}$  (216 mg, 1.5 mmol 30 mol%) and the tube was evacuated and backfilled with  $\text{N}_2$  (one time). 12.5 mL anhydrous  $\text{EtOAc}$ , thiol catalyst triisopropylsilanethiol (**2d**, 0.5 mL 1M, 10 mol%) in  $\text{EtOAc}$  solution, and  $\text{D}_2\text{O}$  (2.0mL, 20 equiv) were added by syringe under  $\text{N}_2$ . The mixture was degassed by freeze-pump-thaw method, then sealed with parafilm. The solution was then stirred at room temperature under the irradiation of a blue LED strip for 36h. After completion of the reaction, the mixture was dumped to 50 mL separatory funnel. Bottom  $\text{D}_2\text{O}$  layer was separated for the usage in next batch. Top organic layer was dried over  $\text{Na}_2\text{SO}_4$ , filtered and concentrated under reduced pressure. The residue was purified by flash chromatography (acetone/hexane = 1/97) on silica gel to provide the corresponding products 423 mg (70% yield, 97% D) as pale yellow liquid.

#### Procedure for deuteration in 2<sup>nd</sup> batch using $\text{D}_2\text{O}$ from 1<sup>st</sup> batch

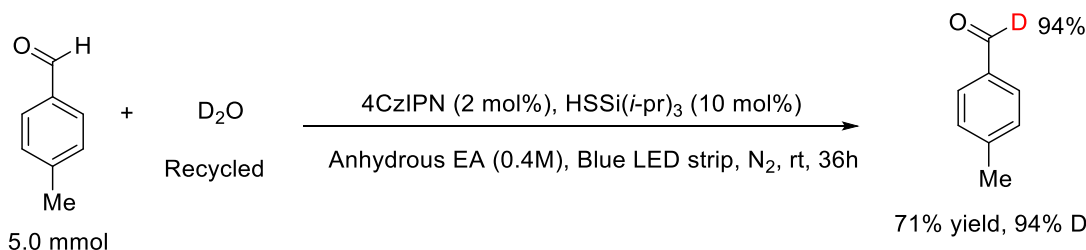

To an oven-dried 25 mL-Schlenk tube equipped with a stir bar, was added 4-methylbenzaldehyde (600 mg, 5.0 mmol, 1.0 equiv) and photocatalyst 4CzIPN (80 mg, 2 mol%), the tube was evacuated and backfilled with N<sub>2</sub> (one time). 12.5 mL anhydrous EtOAc, thiol catalyst triisopropylsilanethiol (**2d**, 0.5 mL 1M, 10 mol%) in EtOAc solution, and D<sub>2</sub>O (from 1<sup>st</sup> batch together with 100 mg, 1.0 equiv to compensate the loss of D<sub>2</sub>O) were added by syringe under N<sub>2</sub>. The mixture was degassed by freeze-pump-thaw method, then sealed with parafilm. The solution was then stirred at room temperature under the irradiation of a blue LED strip for 36h. After completion of the reaction, the mixture was dumped to 50 mL separatory funnel. Bottom D<sub>2</sub>O layer was separated for the usage in next batch. Top organic layer was dried over Na<sub>2</sub>SO<sub>4</sub>, filtered and concentrated under reduced pressure. The residue was purified by flash chromatography (acetone/hexane = 1/97) on silica gel to provide the corresponding products 430 mg (71% yield, 94% D) as pale yellow liquid.

#### Procedure for feuteration of 3<sup>rd</sup> batch using D<sub>2</sub>O from 2<sup>nd</sup> batch

To an oven-dried 25 mL-Schlenk tube equipped with a stir bar, was added 4-methylbenzaldehyde (600 mg, 5.0 mmol, 1.0 equiv) and photocatalyst 4CzIPN (80 mg, 2 mol%), the tube was evacuated and backfilled with N<sub>2</sub> (one time). 12.5 mL anhydrous EtOAc, thiol catalyst triisopropylsilanethiol (**2d**, 0.5 mL 1M, 10 mol%) in EA solution, and D<sub>2</sub>O (from 2<sup>nd</sup> batch together with 100 mg, 1.0 equiv to compensate the loss of D<sub>2</sub>O) were added by syringe under N<sub>2</sub>. The mixture was degassed by freeze-pump-thaw method, then sealed with parafilm. The solution was then stirred at room temperature under the irradiation of a blue LED strip for 36h. After completion of the reaction, the mixture was dumped to 50 mL separatory funnel. Bottom D<sub>2</sub>O layer was separated for the usage in next batch. Top organic layer was dried over Na<sub>2</sub>SO<sub>4</sub>, filtered and concentrated under reduced pressure. The residue was purified by flash chromatography (acetone/hexane = 1/97) on silica gel to provide the corresponding products 423 mg (70% yield, 91% D) as pale yellow liquid.

#### Gram scale synthesis of 4-methylbenzaldehyde-formyl-d1

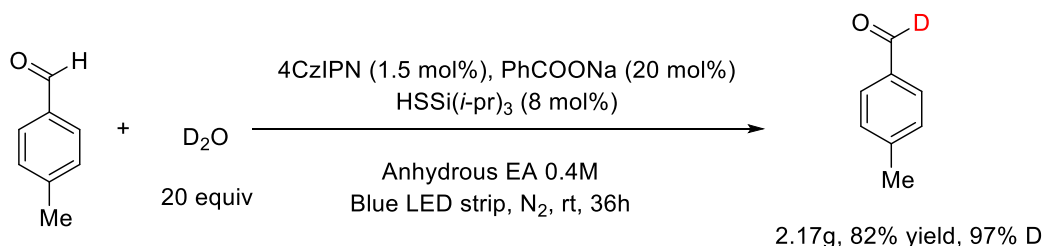

To an oven-dried 100 mL-Schlenk tube equipped with a stir bar, was added 4-methylbenzaldehyde (2.64g, 22.0 mmol, 1.0 equiv), photocatalyst 4CzIPN (264 mg, 1.5 mol%), PhCOONa (216 mg, 1.5 mmol 30 mol%) and the tube was evacuated and backfilled with N<sub>2</sub> (one time). 55 mL anhydrous EA, thiol catalyst triisopropylsilanethiol (**2d**, 1.76 mL 1M, 8 mol%) in EA solution, and D<sub>2</sub>O (8.8 mL, 20 equiv) were added by syringe under N<sub>2</sub>. The mixture was degassed by freeze-pump-thaw method, then sealed with parafilm. The solution was then stirred at room temperature under the irradiation of a blue LED strip for 36h. After completion of the reaction, the mixture was dumped to 125 mL separatory funnel. Top organic layer was dried over Na<sub>2</sub>SO<sub>4</sub>, filtered and concentrated under reduced pressure. The residue was purified by flash chromatography (acetone/hexane = 1/97) on silica gel to provide the corresponding products 2.17 g (82% yield, 97% D) as pale yellow liquid.

**5. Table S2. Cost calculation for the synthesis of 1.0 g 4-Methylbenzaldehyde-formyl-d1**

| Item                             | Vendor            | Price           | MW     | Mmol   | Amount | Cost (\$)    |                         |
|----------------------------------|-------------------|-----------------|--------|--------|--------|--------------|-------------------------|
| Carbazole, 95%                   | Aksci             | \$250 for 1kg   | 167.21 | 10.00  | 1.67 g | 0.42         |                         |
| Tetrafluoroisophthalonitrile     | Ambeed            | \$247 for 25g   | 200.10 | 2.00   | 0.4 g  | 3.95         |                         |
| Dry THF                          | Sigma-aldrich     | \$92.92 for 2L  | —      | —      | 40 ml  | 1.86         |                         |
| NaH (60%)                        | Fisher Scientific | \$128 for 1 kg  | 24.00  | 15.00  | 0.60g  | 0.077        |                         |
|                                  |                   |                 |        |        |        | 6.307        | for 1.51g 4CzIPN        |
|                                  |                   |                 |        |        |        | 4.18         | for 1.0g 4CzIPN         |
|                                  |                   |                 |        |        |        |              |                         |
| Item                             | Vendor            | Price           | MW     | Mmol   | Amount | Cost (\$)    |                         |
| <i>p</i> -Tolualdehyde, 98% (GC) | Aksci             | \$180 for 1kg   | 120.15 | 22.00  | 2.64g  | 0.48         |                         |
| 4CzIPN                           | Self-made         | \$4.18 for 1g   | 799.00 | 0.83   | 0.66g  | 2.76         |                         |
| PhCOONa 99%)                     | Fisher Scientific | \$28.19 for 1kg | 144.10 | 4.4    | 0.63g  | 0.18         |                         |
| Triisopropylsilanethiol (97%)    | Sigma-aldrich     | \$170 for 5g    | 190.42 | 1.76   | 0.335g | 11.39        |                         |
| Deuterium Oxide                  | Sigma-aldrich     | \$609 for 1kg   | 20.03  | 457.60 | 9.17g  | 5.58         |                         |
| Anhydrous EtOAc                  | Sigma-aldrich     | \$62 for 2L     | —      | —      | 55 mL  | 1.7          |                         |
|                                  |                   |                 |        |        |        | 22.09        | for 2.17g product       |
|                                  |                   |                 |        |        |        | <b>10.18</b> | <b>for 1.0g product</b> |

Through calculation, the cost of synthesizing 1.0 g 4-methylbenzaldehyde (97% D ratio) is only about \$10.18. By comparison, Suzhou Liaojian Pharmaceutical Technology Co., Ltd. offers 2200 RMB (\$314) to prepare 1.0 g same product. This protocol demonstrates its cost-effective advantage in synthesis of deuterated aldehydes.

## 6. Acyl radical intermediate trapping experiment

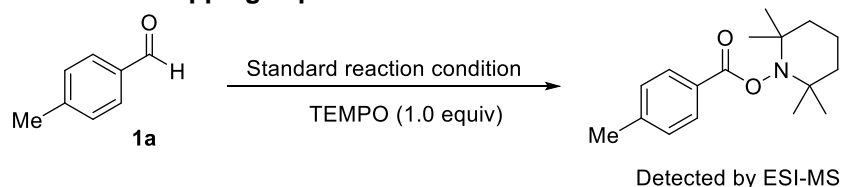

To an oven-dried 10 mL-Schlenk tube equipped with a stir bar, was added 4-methylbenzaldehyde (0.2 mmol, 1.0 equiv), photocatalyst 4CzIPN (8 mg, 5 mol%), PhCOONa (8.6 mg, 30 mol%), TEMPO (31.2 mg, 0.2 mmol, 1.0 equiv) and the tube was evacuated and backfilled with N<sub>2</sub> (one time). 1 mL anhydrous EA, thiol catalyst triisopropylsilanethiol (**2d**, 60 uL, 30 mol%) in EA solution, and D<sub>2</sub>O (160 uL, 40 equiv) were added by syringe under N<sub>2</sub>. The mixture was degassed by freeze-pump-thaw method, then sealed with parafilm. The solution was then stirred at room temperature under the irradiation of a blue LED strip for 36h. After completion of the reaction, the mixture was diluted with Et<sub>2</sub>O (20 mL). The solution was washed with brine 10 mL. The organic layer was dried over anhydrous Na<sub>2</sub>SO<sub>4</sub> and concentrated under reduced pressure. The crude residue was analyzed by ESI-MS and found [M+H]<sup>+</sup> 276.1.

## 7. Observed side reaction

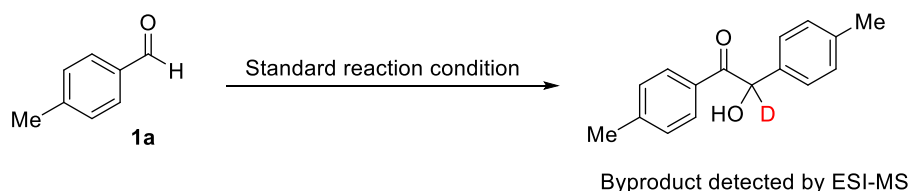

The crude residue was analyzed by ESI-MS and found  $[M+Na]^+$  263.98.

## 8. General procedure and characterization data for compounds 3

### 8.1 Preparation of hydrogen isotope exchanged thiol catalyst 2d in EtOAc solution

To an oven-dried 3 mL borosilicate glass vial equipped with a stir bar, was added **2d** in (1.0 mmol, 190 mg, 1.0 equiv), anhydrous EtOAc (1.0 mL) and D<sub>2</sub>O (10.0 mmol, 200  $\mu$ L, 10.0 equiv). The mixture was stirred at room temperature for 1 h. After the stirring was stopped, the top EA layer was used in reaction as the stock solution (1.0 M).

### 8.2 General procedure for the synthesis of deuterated aldehyde

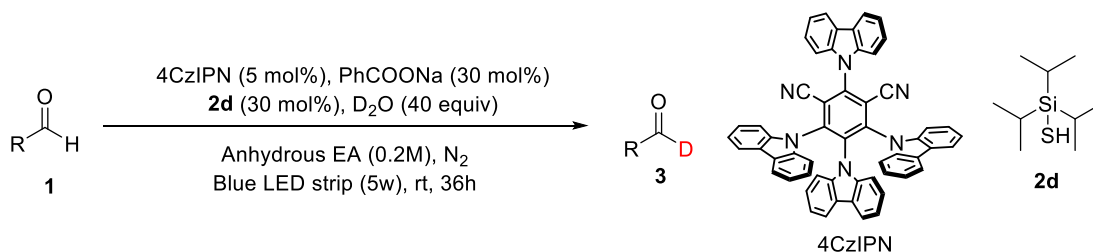

**General Procedure A:** To an oven-dried 10 mL-Schlenk tube equipped with a stir bar, was added aldehyde (0.2 mmol, 1.0 equiv), photocatalyst 4CzIPN (8 mg, 5 mol%), PhCOONa (8.6 mg, 30 mol%) and the tube was evacuated and backfilled with N<sub>2</sub> (one time). 1 mL anhydrous EtOAc, thiol catalyst triisopropylsilanethiol (**2d**, 60  $\mu$ L, 30 mol%) in EtOAc solution, and D<sub>2</sub>O (160  $\mu$ L, 40 equiv) were added by syringe under N<sub>2</sub>. The mixture was degassed by freeze-pump-thaw method, then sealed with parafilm. The solution was then stirred at room temperature under the irradiation of a blue LED strip for 36h. After completion of the reaction, the mixture was concentrated and purified by flash chromatography on silica gel.

**General Procedure B:** To an oven-dried 10 mL-Schlenk tube equipped with a stir bar, was added aldehyde (0.2 mmol, 1.0 equiv), photocatalyst 4CzIPN (8.0 mg, 5 mol%), PhCOONa (8.7 mg, 30 mol%), 1 mL anhydrous EtOAc and D<sub>2</sub>O (40  $\mu$ L, 10 equiv). The tube was stirred at room temperature for 10 min to exchange active protium with deuterium. The solvent was removed under reduced pressure and the tube was evacuated and backfilled with N<sub>2</sub> (one time). 1 mL anhydrous EA, thiol catalyst triisopropylsilanethiol (**2d**, 60  $\mu$ L, 30 mol%) in EtOAc solution, and D<sub>2</sub>O (160  $\mu$ L, 40 equiv) were added by syringe under N<sub>2</sub>. The mixture was degassed by freeze-pump-thaw method, then sealed with parafilm. The solution was then stirred at room temperature under the irradiation of a blue LED strip for 36h. After completion of the reaction, the mixture was concentrated and purified by flash chromatography on silica gel.

### 4-Methylbenzaldehyde-*formyl-d*1 (**3a**)

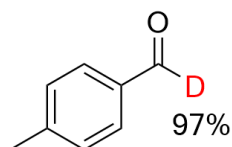

The reaction was carried out according to the general procedure **A**. 4-Methylbenzaldehyde (48.0 mg, 0.4 mmol, 1.0 equiv), 4CzIPN (16.0 mg, 0.02 mmol, 5 mol%), PhCOONa (17.4 mg, 0.06 mmol, 30 mol%), **2d** (120  $\mu$ L, 1M in EtOAc), D<sub>2</sub>O (320  $\mu$ L, 40 equiv) and anhydrous EtOAc (2 mL) were used. The reaction mixture was irradiated by Blue LED strip for 36 h. The residue was purified by flash column chromatography (Et<sub>2</sub>O/hexane = 1/19) to afford product (44mg, 91% yield, 97% D ratio by <sup>1</sup>H NMR) as colorless oil. <sup>1</sup>H NMR (400 MHz, CDCl<sub>3</sub>)  $\delta$  9.93 (s, 0.03H), 7.75 (d, *J* = 8.1 Hz, 2H), 7.30 (d, *J* = 7.8 Hz, 2H), 2.41 (s, 3H). <sup>13</sup>C NMR (100 MHz, CDCl<sub>3</sub>)  $\delta$  191.74 (t, *J* = 26.4 Hz), 145.63, 134.22 (t, *J* = 3.5 Hz), 129.92, 129.79, 21.91. **HRMS** (ESI) calcd for C<sub>8</sub>H<sub>8</sub>DO [M + H]<sup>+</sup> 122.0711, found 122.0704.

#### 1-Naphthaldehyde-formyl-d1 (3b)

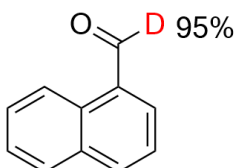

The reaction was carried out according to the general procedure **A**. 1-Naphthaldehyde (62.4 mg, 0.4 mmol, 1.0 equiv), 4CzIPN (8.0 mg, 0.01 mmol, 2.5 mol%), PhCOONa (17.3 mg, 0.12 mmol, 30 mol%), **2d** (120  $\mu$ L, 1M in EtOAc), D<sub>2</sub>O (320  $\mu$ L, 40 equiv) and anhydrous EtOAc (8 mL) were used. The reaction mixture was irradiated by Blue LED strip for 36 h. The residue was purified by flash column chromatography (Et<sub>2</sub>O/hexane = 1/19) to afford product (32mg, 51% yield, 95% D ratio by <sup>1</sup>H NMR) as colorless oil. <sup>1</sup>H NMR (400 MHz, CDCl<sub>3</sub>)  $\delta$  10.40 (s, 0.05H), 9.26 (d, *J* = 8.4 Hz, 1H), 8.09 (d, *J* = 8.2 Hz, 1H), 7.98 (d, *J* = 7.0 Hz, 1H), 7.92 (d, *J* = 8.2 Hz, 1H), 7.69 (t, *J* = 7.7 Hz, 1H), 7.63–7.57 (m, 2H). <sup>13</sup>C NMR (100 MHz, CDCl<sub>3</sub>)  $\delta$  193.32 (t, *J* = 26.6 Hz), 136.69, 135.41, 133.85, 131.463 (t, *J* = 3.4 Hz), 130.68, 129.13, 128.60, 127.12, 125.01. **HRMS** (ESI) calcd for C<sub>11</sub>H<sub>8</sub>DO [M + H]<sup>+</sup> 158.0711, found 158.0712.

#### [1,1'-Biphenyl]-4-carbaldehyde-formyl-d1 (3c)

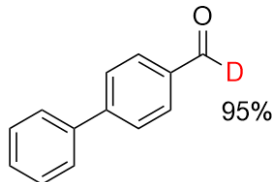

The reaction was carried out according to the general procedure **A**. [1,1'-Biphenyl]-4-carbaldehyde (36.4 mg, 0.2 mmol, 1.0 equiv), 4CzIPN (8.0 mg, 0.01 mmol, 5 mol%), PhCOONa (8.6 mg, 0.06 mmol, 30 mol%), **2d** (60  $\mu$ L, 1M in EtOAc), D<sub>2</sub>O (160  $\mu$ L, 40 equiv) and anhydrous DCE/anhydrous EtOAc (0.5 mL/0.5 mL) were used. The reaction mixture was irradiated by 34 W Blue LED strip for 5 h. The residue was purified by flash column chromatography (acetone/hexane = 1/9) to afford product (29mg, 79% yield, 95% D ratio by <sup>1</sup>H NMR) as colorless oil. <sup>1</sup>H NMR (400 MHz, CDCl<sub>3</sub>)  $\delta$  10.06 (s, 0.09H), 7.96 (d, *J* = 8.1 Hz, 2H), 7.76 (d, *J* = 8.0 Hz, 2H), 7.66–7.63 (m, 2H), 7.51–7.47 (m, 2H), 7.44–7.40 (m, 1H). <sup>13</sup>C NMR (100 MHz, CDCl<sub>3</sub>)  $\delta$  191.56 (t, *J* = 26.5 Hz), 147.12, 139.66, 135.12 (t, *J* = 3.5 Hz), 130.25, 129.02, 128.49, 127.65, 127.35. **HRMS** (ESI) calcd for C<sub>13</sub>H<sub>9</sub>DO [M + H]<sup>+</sup> 184.0867, found 184.0858.

#### 4-Methoxybenzaldehyde-formyl-d1 (3d)

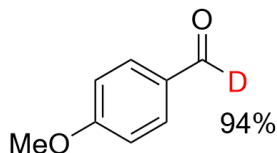

The reaction was carried out according to the general procedure **A**. 4-Methoxybenzaldehyde (54.8 mg, 0.4 mmol), 4CzIPN (16.0 mg, 0.02 mmol, 5 mol%), PhCOONa (17.4 mg, 0.12 mmol, 30 mol%), **2d** (120  $\mu$ L, 1M in EtOAc, 30 mol%), D<sub>2</sub>O (160  $\mu$ L, 20 equiv) and anhydrous EtOAc (2.0 mL) were used. The reaction

mixture was irradiated by Blue LED strip for 36 h. The residue was purified by flash column chromatography (acetone/hexane = 1/9) to afford product (33mg, 92% yield, 91% D ratio by  $^1\text{H}$  NMR) as colorless oil.  $^1\text{H}$  NMR (400 MHz,  $\text{CDCl}_3$ )  $\delta$  9.85 (s, 0.06H), 7.80 (d,  $J$  = 8.8 Hz, 2H), 6.97 (d,  $J$  = 8.8 Hz, 2H), 3.85 (s, 3H).  $^{13}\text{C}$  NMR (100 MHz,  $\text{CDCl}_3$ )  $\delta$  190.48 (t,  $J$  = 26.2 Hz), 190.22, 164.65, 131.98, 129.91 (t,  $J$  = 3.5 Hz), 114.35. **HRMS** (ESI) calcd for  $\text{C}_8\text{H}_8\text{DO}$  [ $\text{M} + \text{H}$ ] $^+$  138.0600, found 138.0655.

### 2-Methoxybenzaldehyde-formyl- $d_1$ (3e)

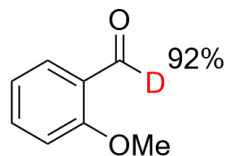

The reaction was carried out according to the general procedure **A**. 2-Methoxybenzaldehyde (54.8 mg, 0.4 mmol, 1.0 equiv), 4CzIPN (8.0 mg, 0.01 mmol, 2.5 mol%),  $\text{PhCOONa}$  (17.4 mg, 0.12 mmol, 30 mol%), **2d** (120  $\mu\text{L}$ , 1M in EtOAc, 30 mol%),  $\text{D}_2\text{O}$  (320  $\mu\text{L}$ , 40 equiv) and anhydrous EtOAc (2.0 mL) were used. The reaction mixture was irradiated by Blue LED strip for 36 h. The residue was purified by flash column chromatography ( $\text{Et}_2\text{O}$ /hexane = 1/9) to afford product (54mg, 99% yield, 92% D ratio by  $^1\text{H}$  NMR) as colorless oil.  $^1\text{H}$  NMR (400 MHz,  $\text{CDCl}_3$ )  $\delta$  10.44 (s, 0.08H), 7.80 (dd,  $J$  = 7.7, 1.8 Hz, 1H), 7.54–7.50 (m, 1H), 6.98 (dd,  $J$  = 15.9, 8.1 Hz, 2H), 3.89 (s, 3H).  $^{13}\text{C}$  NMR (100 MHz,  $\text{CDCl}_3$ )  $\delta$  189.49 (t,  $J$  = 26.2 Hz), 161.91, 136.02, 128.51, 124.78 (t,  $J$  = 3.3 Hz), 120.68, 111.69, 55.68. **HRMS** (ESI) calcd for  $\text{C}_8\text{H}_8\text{DO}$  [ $\text{M} + \text{H}$ ] $^+$  138.0600, found 138.0653.

### 2,4,6-Trimethoxybenzaldehyde-formyl- $d_1$ (3f)

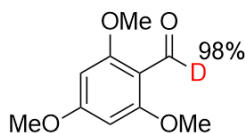

The reaction was carried out according to the general procedure **A**. 2,4,6-Trimethoxybenzaldehyde (39.2 mg, 0.2 mmol, 1.0 equiv), 4CzIPN (8.0 mg, 0.01 mmol, 5 mol%),  $\text{PhCOONa}$  (8.6 mg, 0.06 mmol, 30 mol%), **2d** (60  $\mu\text{L}$ , 1M in EtOAc, 30 mol%),  $\text{D}_2\text{O}$  (160  $\mu\text{L}$ , 40 equiv) and anhydrous EtOAc (1.0 mL) were used. The reaction mixture was irradiated by Blue LED strip for 36 h. The residue was purified by flash column chromatography (EtOAc/hexane = 2/1-3/1) to afford product (36mg, 99% yield, 98% D ratio by  $^1\text{H}$  NMR) as white solid.  $^1\text{H}$  NMR (400 MHz,  $\text{CDCl}_3$ )  $\delta$  10.31 (s, 0.02H), 6.04 (s, 2H), 3.84 (s, s, 9H).  $^{13}\text{C}$  NMR (100 MHz,  $\text{CDCl}_3$ )  $\delta$  187.42 (t,  $J$  = 26.2 Hz), 166.31, 164.18, 108.71 (t,  $J$  = 3.4Hz), 90.29 (t,  $J$  = 2.4Hz), 56.03 (q,  $J$  = 4.8 Hz), 55.56 (q,  $J$  = 4.8 Hz). **HRMS** (ESI) calcd for  $\text{C}_{10}\text{H}_{12}\text{DO}_4$  [ $\text{M} + \text{H}$ ] $^+$  198.0871, found 198.0862.

### 4-Chlorobenzaldehyde-formyl- $d_1$ (3g)

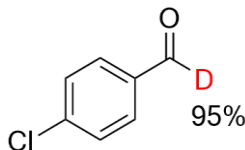

The reaction was carried out according to the general procedure **A**. 4-Chlorobenzaldehyde (56.0 mg, 0.4 mmol, 1.0 equiv), 4CzIPN (8.0 mg, 0.01 mmol, 2.5 mol%),  $\text{NaOAc}$  (9.8 mg, 0.12 mmol, 30 mol%) instead of  $\text{PhCOONa}$ , **2d** (120  $\mu\text{L}$ , 1M in EtOAc, 30 mol%),  $\text{D}_2\text{O}$  (320  $\mu\text{L}$ , 40 equiv) and anhydrous EtOAc (2.0 mL) were used. The reaction mixture was irradiated by Blue LED strip for 36 h. The residue was purified by flash column chromatography ( $\text{Et}_2\text{O}$ /hexane = 1/19) to afford product (32mg, 57% yield, 95% D ratio by  $^1\text{H}$  NMR) as white solid.  $^1\text{H}$  NMR (400 MHz,  $\text{CDCl}_3$ )  $\delta$  9.96 (s, 0.05H), 7.81 (d,  $J$  = 8.0 Hz, 2H), 7.49 (d,  $J$  = 8.0 Hz, 2H).  $^{13}\text{C}$  NMR (100 MHz,  $\text{CDCl}_3$ )  $\delta$  190.59 (t,  $J$  = 26.7 Hz), 141.01, 134.72 (t,  $J$  = 3.6Hz), 130.96, 129.55. **HRMS** (ESI) calcd for  $\text{C}_7\text{H}_5\text{DClO}$  [ $\text{M} + \text{H}$ ] $^+$  142.0164, found 142.0160.

### 4-Bromobenzaldehyde-formyl- $d_1$ (3h)



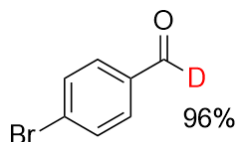

The reaction was carried out according to the general procedure **A**. 4-Bromobenzaldehyde (74.0 mg, 0.4 mmol, 1.0 equiv), 4CzIPN (8.0 mg, 0.01 mmol, 2.5 mol%), PhCOONa (8.6 mg, 0.06 mmol, 30 mol%), **2d** (120  $\mu$ L, 1M in EtOAc), D<sub>2</sub>O (320  $\mu$ L, 40 equiv) and anhydrous DCE/anhydrous EtOAc (1.0 mL/1.0 mL) were used. The reaction mixture was irradiated by Blue LED strip for 36 h. The residue was purified by flash column chromatography (Et<sub>2</sub>O/hexane = 1/19) to afford product (61mg, 82% yield, 96% D ratio by <sup>1</sup>H NMR) as white solid. <sup>1</sup>H NMR (400 MHz, CDCl<sub>3</sub>)  $\delta$  9.96 (s, 0.05H), 7.73 (d, *J* = 8.8 Hz, 2H), 7.67 (d, *J* = 8.8 Hz, 2H). <sup>13</sup>C NMR (100 MHz, CDCl<sub>3</sub>)  $\delta$  190.82 (t, *J* = 26.7 Hz), 135.09 (t, *J* = 3.6Hz), 132.52, 131.05, 129.86. **HRMS** (ESI) calcd for C<sub>7</sub>H<sub>5</sub>DBrO [M + H]<sup>+</sup> 185.9659 and 187.9639, found 186.9659 and 187.9639.

#### 4-Iodobenzaldehyde-formyl-d1 (3i)

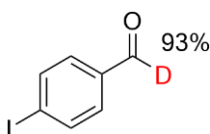

The reaction was carried out according to the general procedure **A**. 4-Iodobenzaldehyde (46.4 mg, 0.2 mmol, 1.0 equiv), 4CzIPN (8.0 mg, 0.01 mmol, 5 mol%), PhCOONa (8.6 mg, 0.06 mmol, 30 mol%), **2d** (60  $\mu$ L, 1M in EtOAc, 30 mol%), D<sub>2</sub>O (160  $\mu$ L, 40 equiv) and anhydrous EtOAc (1.0 mL) were used. The reaction mixture was irradiated by Blue LED strip for 36 h. The residue was purified by flash column chromatography (Et<sub>2</sub>O/hexane = 1/19) to afford product (23mg, 50% yield, 93% D ratio by <sup>1</sup>H NMR) as white solid. <sup>1</sup>H NMR (500 MHz, CDCl<sub>3</sub>)  $\delta$  9.95 (s, 0.07H), 7.91 (d, *J* = 8.5 Hz, 2H), 7.59 (d, *J* = 8.5 Hz, 2H). <sup>13</sup>C NMR (125 MHz, CDCl<sub>3</sub>)  $\delta$  191.42 (t, *J* = 26.3 Hz), 138.66, 135.72 (t, *J* = 3.7Hz), 131.02, 103.01. **HRMS** (ESI) calcd for C<sub>7</sub>H<sub>5</sub>DIIO [M + H]<sup>+</sup> 233.9521, found 233.9521.

#### 4-Hydroxybenzaldehyde-formyl-d1 (3j)

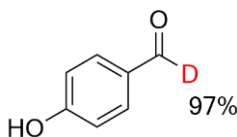

The reaction was carried out according to the general procedure **A**. 4-Hydroxybenzaldehyde (48.8 mg, 0.4 mmol, 1.0 equiv), 4CzIPN (16.0 mg, 0.02 mmol, 5 mol%), PhCOONa (17.4 mg, 0.12 mmol, 30 mol%), **2d** (120  $\mu$ L, 1M in EtOAc, 30 mol%), D<sub>2</sub>O (400  $\mu$ L, 50 equiv) and anhydrous EtOAc (2.0 mL) were used. The reaction mixture was irradiated by Blue LED strip for 36 h. The residue was purified by flash column chromatography (DCM/ EtOAc/hexane = 1/2/7) to afford product (48mg, 99% yield, 97% D ratio by <sup>1</sup>H NMR) as white solid. <sup>1</sup>H NMR (400 MHz, CDCl<sub>3</sub>)  $\delta$  9.86 (s, 0.03H), 7.82 (d, *J* = 8.0 Hz, 2H), 6.97 (d, *J* = 8.0 Hz, 2H), 6.21 (s, 1H). <sup>13</sup>C NMR (125 MHz, DMSO)  $\delta$  190.90 (t, *J* = 26.5 Hz), 163.56, 132.27, 128.55 (t, *J* = 3.0 Hz), 116.00. **HRMS** (ESI) calcd for C<sub>7</sub>H<sub>6</sub>DO<sub>2</sub> [M + H]<sup>+</sup> 124.0503, found 124.0497.

#### 4-Hydroxy-3-methoxybenzaldehyde-formyl-d1(3k)

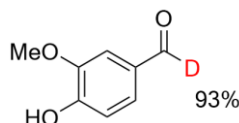

The reaction was carried out according to the general procedure **B**. To an oven-dried 10 mL-Schlenk tube equipped with a stir bar, was added 4-hydroxy-3-methoxybenzaldehyde (30.4 mg, 0.2 mmol, 1.0 equiv), 4CzIPN (8.0 mg, 0.01 mmol, 5 mol%), NaOAc (4.9 mg, 0.06 mmol, 30 mol%), anhydrous Na<sub>2</sub>CO<sub>3</sub> (21.2 mg, 0.2 mmol, 1.0 equiv), 1.0 mL anhydrous EtOAc and D<sub>2</sub>O (40  $\mu$ L, 10 equiv). The tube was stirred at room temperature for 10 min to exchange active protium with deuterium. The solvent was removed under reduced

pressure and the tube was evacuated and backfilled with N<sub>2</sub> (one time). **2d** (60 uL, 1M in EA, 30 mol%), D<sub>2</sub>O (160 uL, 40 equiv) and anhydrous EtOAc (1.0 mL) were added to tube under N<sub>2</sub> by syringe. The mixture was degassed by freeze-pump-thaw method, then sealed with parafilm. The reaction mixture was irradiated by Blue LED strip for 36 h. The residue was purified by flash column chromatography (DCM/ EtOAc/hexane = 1/1/3) to afford product (30mg, 99% yield, 97% D ratio by <sup>1</sup>H NMR) as white solid. <sup>1</sup>H NMR (400 MHz, CDCl<sub>3</sub>) δ 9.81 (s, 0.03H), 7.43-7.40 (m, 2H), 7.03 (d, *J* = 8.4 Hz, 1H), 6.43 (s, 1H), 3.94 (s, 3H). <sup>13</sup>C NMR (100 MHz, CDCl<sub>3</sub>) δ 190.77 (t, *J* = 26.5 Hz), 151.88 (s), 147.31 (s), 129.85 (t, *J* = 3.5 Hz), 127.63, 114.54, 108.94, 56.21. **HRMS** (ESI) calcd for C<sub>8</sub>H<sub>8</sub>DO<sub>3</sub> [*M* + *H*]<sup>+</sup> 154.0609, found 154.0603.

#### 4-Formylphenyl acetate-*formyl-d1* (3l)

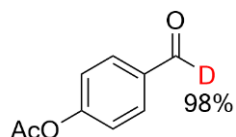

The reaction was carried out according to the general procedure **A**. 4-Formylphenyl acetate (32.8 mg, 0.2 mmol, 1.0 equiv), 4CzIPN (8.0 mg, 0.01 mmol, 5 mol%), PhCOONa (8.6 mg, 0.06 mmol, 30 mol%), **2d** (60 uL, 1M in EtOAc), D<sub>2</sub>O (160 uL, 40 equiv) and anhydrous EtOAc (1.0 mL) were used. The reaction mixture was irradiated by Blue LED strip for 36 h. The residue was purified by flash column chromatography (acetone/hexane = 1/5) to afford product (16mg, 50% yield, 98% D ratio by <sup>1</sup>H NMR) as colorless oil. <sup>1</sup>H NMR (400 MHz, CDCl<sub>3</sub>) δ 9.98 (s, 0.02H), 7.91 (d, *J* = 8.4 Hz, 2H), 7.27 (d, *J* = 8.2 Hz, 2H), 2.33 (s, 3H). <sup>13</sup>C NMR (100 MHz, CDCl<sub>3</sub>) δ 190.90 (t, *J* = 26.5 Hz), 168.96, 155.60, 134.14 (t, *J* = 3.5 Hz), 131.40, 122.56, 21.17. **HRMS** (ESI) calcd for C<sub>9</sub>H<sub>8</sub>DO<sub>3</sub> [*M* + *H*]<sup>+</sup> 166.0609, found 166.0604.

#### 4-(Allyloxy)benzaldehyde-*formyl-d1* (3m)

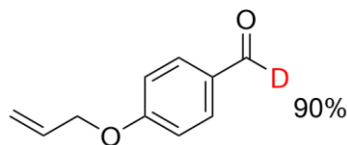

The reaction was carried out according to the general procedure **A**. To an oven-dried 10 mL-Schlenk tube equipped with a stir bar, was added 4CzIPN (8.0 mg, 0.01 mmol, 5 mol%), dry CsOAc (11.5 mg, 0.06 mmol, 30 mol%), Cs<sub>2</sub>CO<sub>3</sub> (13.0 mg, 0.04 mmol, 20 mol%). The tube was evacuated and backfilled with N<sub>2</sub> (one time). 4-(Allyloxy)benzaldehyde (32.4 mg, 0.2 mmol, 1.0 equiv), 1 mL anhydrous EtOAc, thiol catalyst triisopropylsilanethiol (**2d**, 60 uL, 30 mol%) in EtOAc solution, and D<sub>2</sub>O (160 uL, 40 equiv) were added by syringe under N<sub>2</sub>. The mixture was degassed by freeze-pump-thaw method, then sealed with parafilm. The solution was then stirred at room temperature under the irradiation of two 34 W Kessil Blue LEDs instead of Blue LED strip. Electronic fan was used to cool the tube. After 1h, another portion of 4CzIPN (8.0 mg, 0.01 mmol 5 mol%) was added to reaction. The solution was then stirred at room temperature under the irradiation of two 34 W Kessil Blue LEDs for another 5h. Electronic fan was used to cool the tube. After completion of reaction, the mixture was concentrated and purified by flash column chromatography (acetone/hexane = 1/5) to afford product (25mg, 74% yield, 90% D ratio by <sup>1</sup>H NMR) as colorless oil. <sup>1</sup>H NMR (400 MHz, CDCl<sub>3</sub>) δ 9.88 (s, 0.10H), 7.83 (d, *J* = 8.8 Hz, 2H), 7.01 (d, *J* = 8.8 Hz, 2H), 6.10-6.00 (m, 1H), 5.38 (ddd, *J* = 13.9, 11.8, 1.4 Hz, 2H), 4.62 (dt, *J* = 5.3, 1.4 Hz, 2H). <sup>13</sup>C NMR (100 MHz, CDCl<sub>3</sub>) δ 190.61 (t, *J* = 26.2 Hz), 163.74, 132.41, 132.09, 130.10 (t, *J* = 3.5 Hz), 118.49, 115.14, 69.15. **HRMS** (ESI) calcd for C<sub>10</sub>H<sub>10</sub>DO<sub>3</sub> [*M* + *H*]<sup>+</sup> 164.0816, found 164.0809.

#### *N*-(4-Formylphenyl)acetamide-*formyl-d1* (3n)

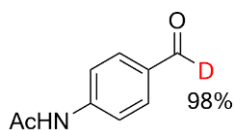



The reaction was carried out according to the general procedure **A**. *N*-(4-Formylphenyl)acetamide (65.2 mg, 0.4 mmol, 1.0 equiv), 4CzIPN (8.0 mg, 0.01 mmol, 2.5 mol%), PhCOONa (17.4 mg, 0.12 mmol, 30 mol%), **2d** (120  $\mu$ L, 1M in EtOAc, 30 mol%), D<sub>2</sub>O (400  $\mu$ L, 50 equiv) and anhydrous EtOAc (2.0 mL) were used. The reaction mixture was irradiated by Blue LED strip for 36 h. The residue was purified by flash column chromatography (EtOAc/hexane = 2/1-3/1) to afford product (48mg, 85% yield, 97% D ratio by <sup>1</sup>H NMR) as light yellow solid. <sup>1</sup>H NMR (400 MHz, CDCl<sub>3</sub>)  $\delta$  9.92 (s, 0.02H), 7.85 (d, *J* = 8.4 Hz, 2H), 7.74 (br, 1H), 7.70 (d, *J* = 8.4 Hz, 2H), 2.23 (s, 3H). <sup>13</sup>C NMR (100 MHz, CDCl<sub>3</sub>)  $\delta$  190.91 (t, *J* = 26.4 Hz), 168.87, 143.69, 132.30 (t, *J* = 3.2 Hz), 131.30, 119.36, 24.96. **HRMS** (ESI) calcd for C<sub>9</sub>H<sub>9</sub>DNO<sub>2</sub> [M + H]<sup>+</sup> 165.0769, found 165.0763.

#### 4-Morpholinobenzaldehyde-formyl-d1 (3o)

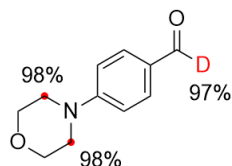

The reaction was carried out according to the general procedure **A**. 4-Morpholinobenzaldehyde (38.2 mg, 0.2 mmol, 1.0 equiv), 4CzIPN (8.0 mg, 0.01 mmol, 5 mol%), PhCOONa (8.7 mg, 0.06 mmol, 30 mol%), Na<sub>2</sub>CO<sub>3</sub> (6.4 mg, 0.06 mmol, 30 mol%), **2d** (60  $\mu$ L, 1M in EtOAc, 30 mol%), D<sub>2</sub>O (320  $\mu$ L, 80 equiv) and anhydrous EtOAc (1.0 mL) were used. The reaction mixture was irradiated by Blue LED strip for 36 h. The residue was purified by flash column chromatography (EtOAc/hexane = 1/1) to afford product (32mg, 83% yield, 97% D ratio by <sup>1</sup>H NMR) as brown solid. <sup>1</sup>H NMR (500 MHz, CDCl<sub>3</sub>)  $\delta$  9.79 (s, 0.03H), 7.76 (d, *J* = 9.0 Hz, 2H), 6.90 (d, *J* = 9.0 Hz, 2H), 3.84 (s, 4H), 3.32-3.30 (m, 0.1H, 98% D ratio). <sup>13</sup>C NMR (125 MHz, CDCl<sub>3</sub>)  $\delta$  190.46 (t, *J* = 26.0 Hz), 155.38, 132.00, 127.71 (t, *J* = 3.3 Hz), 113.53, 66.44, 46.90, 46.74, 46.57, 46.41, 46.23 (quint, *J* = 20.9 Hz). **HRMS** (ESI) calcd for C<sub>11</sub>H<sub>9</sub>D<sub>5</sub>NO<sub>2</sub> [M + H]<sup>+</sup> 197.1333, found 197.1324.

#### 1*H*-indole-3-carbaldehyde-formyl-d1 (3p)

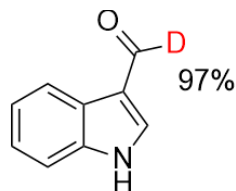

The reaction was carried out according to the general procedure **A**. 1*H*-indole-3-carbaldehyde (58.4 mg, 0.4 mmol, 1.0 equiv), 4CzIPN (8.0 mg, 0.01 mmol, 2.5 mol%), PhCOONa (17.4 mg, 0.12 mmol, 30 mol%), **2d** (120  $\mu$ L, 1M in EtOAc, 30 mol%), D<sub>2</sub>O (400  $\mu$ L, 50 equiv) and anhydrous EtOAc (2.0 mL) were used. The reaction mixture was irradiated by Blue LED strip for 36 h. The residue was purified by flash column chromatography (EtOAc/hexane/DCM = 1/1/1) to afford product (50mg, 87% yield, 97% D ratio by <sup>1</sup>H NMR) as light brown solid. <sup>1</sup>H NMR (400 MHz, DMSO)  $\delta$  12.13 (s, 1H), 9.93 (s, 0.03H), 8.28 (d, *J* = 2.0 Hz, 1H), 8.10 (s, 1H), 7.52-7.50 (m, 1H), 7.27-7.20 (m, 2H). <sup>13</sup>C NMR (100 MHz, DMSO)  $\delta$  184.70 (t, *J* = 26.0 Hz), 138.39, 137.03, 124.12, 123.43, 122.09, 120.82, 118.06 (t, *J* = 3.3 Hz), 112.39. **HRMS** (ESI) calcd for C<sub>9</sub>H<sub>7</sub>DNO [M + H]<sup>+</sup> 147.0663, found 147.0657.

#### 1*H*-indole-6-carbaldehyde-formyl-d1 (3q)

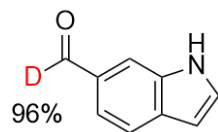

The reaction was carried out according to the general procedure **A**. 1*H*-indole-3-carbaldehyde (58.4 mg, 0.4 mmol, 1.0 equiv), 4CzIPN (8.0 mg, 0.01 mmol, 2.5 mol%), PhCOONa (17.4 mg, 0.12 mmol, 30 mol%), **2d** (120  $\mu$ L, 1M in EtOAc, 30 mol%), D<sub>2</sub>O (400  $\mu$ L, 50 equiv) and anhydrous EtOAc (2.0 mL) were used.

The reaction mixture was irradiated by Blue LED strip for 36 h. The residue was purified by flash column chromatography (EtOAc/hexane/DCM = 1/1/1) to afford product (54mg, 93% yield, 96% D ratio by  $^1\text{H}$  NMR) as light brown solid.  $^1\text{H}$  NMR (400 MHz, DMSO)  $\delta$  11.69 (s, 1H), 10.01 (s, 0.04H), 8.01 (s, 1H), 7.71–7.67 (m, 2H), 7.55 (d,  $J$  = 8.2 Hz, 1H), 6.58 (s, 1H).  $^{13}\text{C}$  NMR (100 MHz, DMSO)  $\delta$  192.44 (t,  $J$  = 27.2 Hz), 135.27, 132.56, 130.37, 130.11 (t,  $J$  = 2.4 Hz), 120.43, 118.82, 115.51, 102.04. **HRMS** (ESI) calcd for  $\text{C}_9\text{H}_7\text{DNO}$  [ $\text{M} + \text{H}$ ] $^+$  147.0663, found 147.0657.

### Benzo[*b*]thiophene-3-carbaldehyde-formyl-*d*1 (2r)

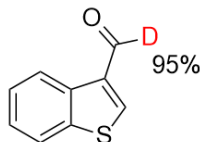

The reaction was carried out according to the general procedure **A**. Benzo[*b*]thiophene-3-carbaldehyde (64.8 mg, 0.4 mmol, 1.0 equiv), 4CzIPN (8.0 mg, 0.01 mmol, 2.5 mol%), PhCOONa (17.4 mg, 0.12 mol%, 30 mol%), **2d** (120  $\mu\text{L}$ , 1M in EtOAc, 30 mol%),  $\text{D}_2\text{O}$  (320  $\mu\text{L}$ , 40 equiv) and anhydrous EtOAc (2.0 mL) were used. The reaction mixture was irradiated by Blue LED strip for 36 h. The residue was purified by flash column chromatography (Et $_2$ O/hexane = 1/9) to afford product (41mg, 63% yield, 95% D ratio by  $^1\text{H}$  NMR) as light brown solid.  $^1\text{H}$  NMR (400 MHz,  $\text{CDCl}_3$ )  $\delta$  10.13 (s, 0.05H), 8.68 (d,  $J$  = 8.1 Hz, 1H), 8.29 (s, 1H), 7.87 (d,  $J$  = 7.9 Hz, 1H), 7.48 (m, 2H).  $^{13}\text{C}$  NMR (100 MHz,  $\text{CDCl}_3$ )  $\delta$  185.18 (t,  $J$  = 26.7 Hz), 143.26, 140.53, 136.47 (t,  $J$  = 3.7 Hz), 135.24, 126.24, 126.18, 124.90, 122.51, 77.48, 76.84. **HRMS** (ESI) calcd for  $\text{C}_9\text{H}_6\text{DOS}$  [ $\text{M} + \text{H}$ ] $^+$  164.0275, found 164.0271.

### 1-(*tert*-Butyl) 2-(4-formylphenyl) (*S*)-pyrrolidine-1,2-dicarboxylate-formyl-*d*1 (3s)

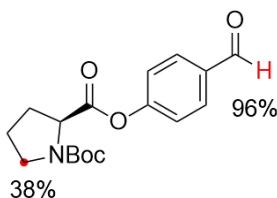

The reaction was carried out according to the general procedure **A**. 1-(*tert*-Butyl) 2-(4-formylphenyl) (*S*)-pyrrolidine-1,2-dicarboxylate (prepared according to reported procedure<sup>10</sup>, 64.0 mg, 0.2 mmol, 1.0 equiv), 4CzIPN (8.0 mg, 0.01 mmol, 5 mol%), PhCOONa (8.7 mg, 0.06 mmol, 30 mol%), **2d** (60  $\mu\text{L}$ , 1M in EtOAc, 30 mol%),  $\text{D}_2\text{O}$  (160  $\mu\text{L}$ , 40 equiv) and anhydrous EtOAc/anhydrous DCE (0.4mL/0.6mL) were used. The reaction mixture was irradiated by Blue LED strip for 36 h. The residue was purified by flash column chromatography (EtOAc/hexane/DCM = 1/5/1) to afford product (42mg, 66% yield, 96% D ratio by  $^1\text{H}$  NMR) as colorless oil.  $^1\text{H}$  NMR (400 MHz,  $\text{CDCl}_3$ )  $\delta$  9.79 (s, s, rotamer, 0.04H), 7.9-7.89 (d, d,  $J$  = 8.4 Hz, rotamer, 2H), 7.29 (t,  $J$  = 8.5 Hz, 2H), 4.50 (dd, dd,  $J$  = 8.4, 4.0 Hz, 1H), 3.66-3.43 (m, 1.25H), 2.45-2.31 (m, 1H), 2.28-2.13 (m, 1H), 2.08-1.91 (m, 2H), 1.47 and 1.46 (s, s, rotamer, 9H).  $^{13}\text{C}$  NMR (100 MHz,  $\text{CDCl}_3$ )  $\delta$  191.07-190.32 (m, split by D, rotamer), 171.20, 171.12, 155.67, 155.37, 154.63, 153.75, 134.17-134.03 (m, rotamer), 131.40, 131.29, 122.41, 122.30, 80.53, 80.34, 59.34, 59.24, 46.78-46.10 (m, split by D), 31.15, 30.10, 24.61, 23.77. **HRMS** (ESI) calcd for  $\text{C}_{17}\text{H}_{20}\text{DNO}_5\text{Na}$  [ $\text{M} + \text{Na}$ ] $^+$  343.1375, found 343.1365; calcd for  $\text{C}_{17}\text{H}_{20}\text{D}_2\text{NO}_5$  [ $\text{M} + \text{H}$ ] $^+$  322.1618, found 322.1616.

### 3-Phenylpropanal-formyl-*d*1 (3t)

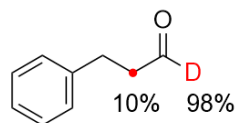

The reaction was carried out according to the general procedure **A**. 3-Phenylpropanal (53.6 mg, 0.4 mmol, 1.0 equiv), 4CzIPN (8.0 mg, 0.01 mmol, 2.5 mol%), PhCOONa (17.4 mg, 0.12 mmol, 30 mol%), **2d** (120  $\mu\text{L}$ , 1M in EtOAc, 30 mol%),  $\text{D}_2\text{O}$  (320  $\mu\text{L}$ , 40 equiv) and anhydrous EtOAc (1.0 mL) were used. The reaction

mixture was irradiated by Blue LED strip for 36 h. The residue was purified by flash column chromatography (acetone/hexane = 1/9) to afford product (53mg, 99% yield, 98% D ratio by  $^1\text{H}$  NMR) as colorless oil.  $^1\text{H}$  NMR (400 MHz,  $\text{CDCl}_3$ )  $\delta$  9.82 (s, 0.02H), 7.31 (t,  $J$  = 7.0 Hz, 2H), 7.22 (t,  $J$  = 7.4 Hz, 3H), 2.97 (t,  $J$  = 7.3 Hz, 2H), 2.78 (t,  $J$  = 7.4 Hz, 2H).  $^{13}\text{C}$  NMR (100 MHz,  $\text{CDCl}_3$ )  $\delta$  201.30 (t,  $J$  = 26.0 Hz), 140.43, 128.67, 128.36, 126.36, 45.15 (t,  $J$  = 3.7 Hz), 28.16. **HRMS** (ESI) calcd for  $\text{C}_9\text{H}_6\text{DOS}$  [ $\text{M} + \text{H}$ ] $^+$  164.0275, found 164.0271. **HRMS** (ESI) calcd for  $\text{C}_9\text{H}_6\text{DONa}$  [ $\text{M} + \text{Na}$ ] $^+$  158.0687, found 158.0682.

### 3-(2-Chlorophenyl)propanal-formyl- $\text{d}_1$ (3u)

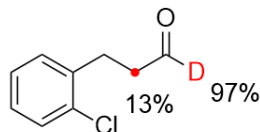

The reaction was carried out according to the general procedure **A**. 3-(2-Chlorophenyl)propanal (prepared according to reported procedure<sup>1</sup>, 67.2 mg, 0.4 mmol), 4CzIPN (8.0 mg, 0.01 mmol, 2.5 mol%),  $\text{PhCOONa}$  (17.4 mg, 0.12 mmol, 30 mol%), **2d** (120  $\mu\text{L}$ , 1M in EtOAc, 30 mol%),  $\text{D}_2\text{O}$  (320  $\mu\text{L}$ , 40 equiv) and anhydrous EtOAc (1.0 mL) were used. The reaction mixture was irradiated by Blue LED strip for 36 h. The residue was purified by flash column chromatography (acetone/hexane = 1/9) to afford product (55mg, 82% yield, 98% D ratio by  $^1\text{H}$  NMR) as pale-yellow oil.  $^1\text{H}$  NMR (500 MHz,  $\text{CDCl}_3$ )  $\delta$  9.83 (t,  $J$  = 1.3 Hz, 0.03H), 7.35 (dd,  $J$  = 7.6, 1.6 Hz, 1H), 7.25–7.23 (m, 1H), 7.21–7.14 (m, 2H), 3.06 (t,  $J$  = 7.6 Hz, 2H), 2.79 (t,  $J$  = 7.6 Hz, 1.74H).  $^{13}\text{C}$  NMR (120 MHz,  $\text{CDCl}_3$ )  $\delta$  201.16 (t,  $J$  = 26.2 Hz), 138.21, 134.07, 130.73, 129.84, 128.10, 127.21, 43.40 (t,  $J$  = 3.9 Hz), 26.20. **HRMS** (ESI) calcd for  $\text{C}_9\text{H}_8\text{DClONa}$  [ $\text{M} + \text{Na}$ ] $^+$  192.0297, found 192.0293.

### 3-(Benzo[d][1,3]dioxol-5-yl)propanal-formyl- $\text{d}_1$ (3v)

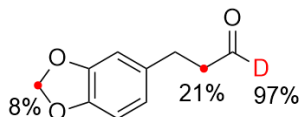

The reaction was carried out according to the general procedure **A**. 3-(Benzo[d][1,3]dioxol-5-yl)propanal (35.6 mg, 0.2 mmol, 1.0 equiv), 4CzIPN (8.0 mg, 0.01 mmol, 5 mol%),  $\text{PhCOONa}$  (8.7 mg, 0.06 mmol, 30 mol%), **2d** (60  $\mu\text{L}$ , 1M in EtOAc, 30 mol%),  $\text{D}_2\text{O}$  (160  $\mu\text{L}$ , 40 equiv) and anhydrous EtOAc (1.0 mL) were used. The reaction mixture was irradiated by Blue LED strip for 36 h. The residue was purified by flash column chromatography (acetone/hexane = 1/9) to afford product (30mg, 85% yield, 97% D ratio by  $^1\text{H}$  NMR) as pale-yellow oil.  $^1\text{H}$  NMR (400 MHz,  $\text{CDCl}_3$ )  $\delta$  9.79 (t,  $J$  = 1.2 Hz, 0.03H), 6.72 (d,  $J$  = 7.9 Hz, 1H), 6.67 (d,  $J$  = 1.5 Hz, 1H), 6.63 (dd,  $J$  = 7.9, 1.4 Hz, 1H), 5.91 and 5.89 (s, s, 1.84H, 21% D ratio), 2.87 (t,  $J$  = 7.4 Hz, 2H), 2.72 (t,  $J$  = 7.3 Hz, 1.58H).  $^{13}\text{C}$  NMR (100 MHz,  $\text{CDCl}_3$ )  $\delta$  201.35 (t,  $J$  = 26.3 Hz), 147.84, 146.08, 134.21, 121.16, 108.86, 108.41, 100.99, 45.46 (t,  $J$  = 3.7 Hz), 27.96. **HRMS** (ESI) calcd for  $\text{C}_9\text{H}_9\text{DO}_3$  [ $\text{M}$ ] $^+$  180.0765, found 180.0759.

### 3-((*tert*-Butyldimethylsilyl)oxy)propanal-formyl- $\text{d}_1$ (3w)

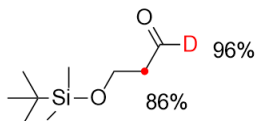

The reaction was carried out according to the general procedure **A**. 3-((*tert*-Butyldimethylsilyl)oxy)propanal (prepared according to reported procedure<sup>11</sup>, 37.6 mg, 0.2 mmol, 1.0 equiv), 4CzIPN (8.0 mg, 0.01 mmol, 5 mol%),  $\text{PhCOONa}$  (8.7 mg, 0.06 mmol, 30 mol%), **2d** (60  $\mu\text{L}$ , 1M in EtOAc, 30 mol%),  $\text{D}_2\text{O}$  (160  $\mu\text{L}$ , 40 equiv) and anhydrous EtOAc (1.0 mL) were used. The reaction mixture was irradiated by Blue LED strip for 36 h. The residue was purified by flash column chromatography (acetone/hexane = 1/9) to afford product (33mg, 87% yield, 96% D ratio by  $^1\text{H}$  NMR) as colorless oil.  $^1\text{H}$  NMR (400 MHz,  $\text{CDCl}_3$ )  $\delta$  9.80 (s, 0.04H), 3.97 (s, 2H), 2.61–2.53 (m, 0.28H, 86% D ratio), 0.87 (s, 9H), 0.06 (s, 6H).  $^{13}\text{C}$  NMR (100 MHz,  $\text{CDCl}_3$ )  $\delta$  202.00 (t,  $J$  = 26.9 Hz), 57.48, 46.68–45.63 (m), 25.95, 18.36, -5.31. **HRMS** (ESI) calcd for  $\text{C}_9\text{H}_{19}\text{D}_2\text{O}_2\text{Si}$  [ $\text{M} + \text{H}$ ] $^+$  191.1431, found 191.1425; calcd for  $\text{C}_9\text{H}_{18}\text{D}_3\text{O}_2\text{Si}$  [ $\text{M} + \text{H}$ ] $^+$  192.1494, found 192.1485.

### 3-(4-(*tert*-Butyl)phenyl)-2-methylpropanal-formyl-*d*1 (3x)

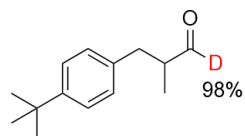

The reaction was carried out according to the general procedure **A**. 3-(4-(*tert*-Butyl)phenyl)-2-methylpropanal (40.8 mg, 0.2 mmol, 1.0 equiv), 4CzIPN (8.0 mg, 0.01 mmol, 5 mol%), PhCOONa (8.7 mg, 0.06 mmol, 30 mol%), **2d** (60  $\mu$ L, 1M in EtOAc, 30 mol%), D<sub>2</sub>O (160  $\mu$ L, 40 equiv) and anhydrous EtOAc (1.0 mL) were used. The reaction mixture was irradiated by Blue LED strip for 36 h. The residue was purified by flash column chromatography (Et<sub>2</sub>O/hexane = 1/9) to afford product (25mg, 60% yield, 98% D ratio by <sup>1</sup>H NMR) as colorless oil. <sup>1</sup>H NMR (400 MHz, CDCl<sub>3</sub>)  $\delta$  9.73 (d, *J* = 1.5 Hz, 0.02H), 7.32 (d, *J* = 8.3 Hz, 2H), 7.11 (d, *J* = 8.2 Hz, 2H), 3.06 (dd, *J* = 13.5, 5.8 Hz, 1H), 2.71–2.55 (m, 2H), 1.31 (s, 9H), 1.10 (d, *J* = 6.9 Hz, 3H). <sup>13</sup>C NMR (100 MHz, CDCl<sub>3</sub>)  $\delta$  204.42 (t, *J* = 26.9 Hz), 149.39, 135.83, 128.80, 125.54, 48.00 (t, *J* = 3.5 Hz), 36.30, 34.54, 31.51, 13.43. **HRMS** (ESI) calcd for C<sub>14</sub>H<sub>19</sub>DONa [M+Na]<sup>+</sup> 228.1462, found 228.1469.

### 2,3-Dihydro-1*H*-indene-2-carbaldehyde-formyl-*d*1 (3y)

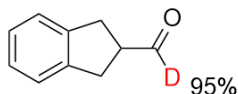

The reaction was carried out according to the general procedure **A**. 2,3-Dihydro-1*H*-indene-2-carbaldehyde (29.2 mg, 0.2 mmol, 1.0 equiv), 4CzIPN (8.0 mg, 0.01 mmol, 5 mol%), PhCOONa (8.7 mg, 0.06 mmol, 30 mol%), **2d** (60  $\mu$ L, 1M in EtOAc, 30 mol%), D<sub>2</sub>O (160  $\mu$ L, 40 equiv) and anhydrous EtOAc (1.0 mL) were used. The reaction mixture was irradiated by Blue LED strip for 36 h. The residue was purified by flash column chromatography (Et<sub>2</sub>O/hexane = 1/9) to afford product (27mg, 91% yield, 95% D ratio by <sup>1</sup>H NMR) as colorless oil. <sup>1</sup>H NMR (400 MHz, CDCl<sub>3</sub>)  $\delta$  9.78 (s, 0.05H), 7.26–7.23 (m, 2H), 7.18–7.16 (m, 2H), 3.32–3.25 (m, 3H), 3.32–3.16 (m, 2H). <sup>13</sup>C NMR (100 MHz, CDCl<sub>3</sub>)  $\delta$  202.66 (t, *J* = 26.2 Hz), 141.22, 126.93, 124.75, 50.62–50.48 (t, *J* = 3.5 Hz), 33.04. **HRMS** (ESI) calcd for C<sub>10</sub>H<sub>9</sub>DONa [M+Na]<sup>+</sup> 170.0687, found 170.0684.

### *tert*-Butyl 4-formylpiperidine-1-carboxylate-formyl-*d*1 (3z)

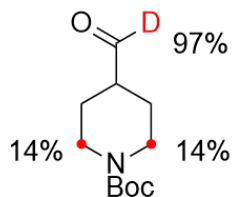

The reaction was carried out according to the general procedure **A**. *tert*-Butyl 4-formylpiperidine-1-carboxylate (29.2 mg, 0.2 mmol, 1.0 equiv), 4CzIPN (8.0 mg, 0.01 mmol, 5 mol%), PhCOONa (8.7 mg, 0.06 mmol, 30 mol%), **2d** (60  $\mu$ L, 1M in EtOAc, 30 mol%), D<sub>2</sub>O (160  $\mu$ L, 40 equiv) and anhydrous DCE (1.0 mL) were used. The reaction mixture was irradiated by Blue LED strip for 36 h. The residue was purified by flash column chromatography (Et<sub>2</sub>O/hexane = 1/9) to afford product (27mg, 91% yield, 95% D ratio by <sup>1</sup>H NMR) as colorless oil. <sup>1</sup>H NMR (400 MHz, CDCl<sub>3</sub>)  $\delta$  9.62 (s, 0.03H), 3.93 (br, 2H), 2.89 (t, *J* = 10.9 Hz, 1.73H), 2.40–2.35(m, 1H), 1.89–1.84 (m, 2H), 1.55–1.48 (m, 2H), 1.41 (s, 9H). <sup>13</sup>C NMR (100 MHz, CDCl<sub>3</sub>)  $\delta$  202.94 (t, *J* = 20.9 Hz), 154.85, 79.75, 47.87–47.75 (m), 42.80 (br), 28.39, 25.11. **HRMS** (ESI) calcd for C<sub>11</sub>H<sub>18</sub>DNO<sub>3</sub> [M+H]<sup>+</sup> 215.1500, found 215.1500.

### Bicyclo[2.2.1]hept-5-ene-2-carboxaldehyde-formyl-*d*1 (3aa)

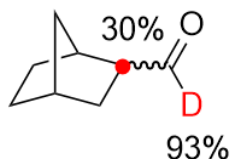

The reaction was carried out according to the general procedure **A**. Bicyclo[2.2.1]hept-5-ene-2-carboxaldehyde (36.6 mg, 0.3 mmol, 1.0 equiv), 4CzIPN (8.0 mg, 0.01 mmol, 3.7 mol%), PhCOONa (13.0 mg, 0.09 mmol, 30 mol%), Cs<sub>2</sub>CO<sub>3</sub> (19.0 mg, 0.06 mmol, 20 mol%), **2d** (60 uL, 1M in EtOAc, 20 mol%), D<sub>2</sub>O (240 uL, 40 equiv) and anhydrous EtOAc (2.0 mL) were used. The reaction mixture was irradiated by Blue LED strip for 36 h. The residue was purified by flash column chromatography (Et<sub>2</sub>O/hexane = 1/9) to afford product (19mg, 52% yield, 93% D ratio by <sup>1</sup>H NMR) as colorless oil. <sup>1</sup>H NMR (400 MHz, CDCl<sub>3</sub>) δ 9.42 (d, *J* = 2.8 Hz, 1H), 6.21 (dd, *J* = 5.5, 3.0 Hz, 1H), 5.99 (dd, *J* = 5.7, 2.8 Hz, 1H), 3.24 (s, 1H), 2.98 (s, 1H), 2.90 (dt, *J* = 9.0, 3.8 Hz, 0.69H), 1.92–1.87 (m, 1H), 1.50–1.40 (m, 2H), 1.31 (dd, *J* = 8.3, 1.4 Hz, 1H). <sup>13</sup>C NMR (100 MHz, CDCl<sub>3</sub>) δ 204.95 (t, *J* = 25.9 Hz), 138.28, 131.94, 52.22 (t, *J* = 3.5 Hz), 49.80, 45.18, 42.90, 27.73. **HRMS** (ESI) calcd for C<sub>8</sub>H<sub>10</sub>DO [M+H]<sup>+</sup> 124.0867, found 124.0867.

#### ***tert*-Butyl (3-oxopropyl)carbamate-formyl-d1 (3ab)**

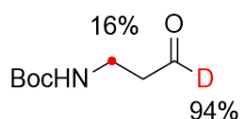

The reaction was carried out according to the general procedure **A**. *tert*-Butyl (3-oxopropyl)carbamate (34.6 mg, 0.2 mmol, 1.0 equiv), 4CzIPN (8.0 mg, 0.01 mmol, 5 mol%), PhCOONa (8.7 mg, 0.06 mmol, 30 mol%), **2d** (40 uL, 1M in EtOAc, 20 mol%), D<sub>2</sub>O (160 uL, 40 equiv) and anhydrous EtOAc (2.0 mL) were used. The reaction mixture was irradiated by Blue LED strip for 36 h. The residue was purified by flash column chromatography (acetone/hexane = 1/3) to afford product (28mg, 81% yield, 94% D ratio by <sup>1</sup>H NMR) as colorless oil. <sup>1</sup>H NMR (400 MHz, CDCl<sub>3</sub>) δ 9.80 (s, 0.06H), 4.89 (s, 1H), 3.46–3.36 (t, *J* = 5.6 Hz, 1.67H), 2.69 (t, *J* = 5.3 Hz, 2H), 1.42 (s, 9H). <sup>13</sup>C NMR (100 MHz, CDCl<sub>3</sub>) δ 201.24 (t, *J* = 26.0 Hz), 155.94, 79.61, 44.25 (t, *J* = 3.6 Hz), 34.13, 28.51. **HRMS** (ESI) calcd for C<sub>8</sub>H<sub>14</sub>DO<sub>3</sub> [M]<sup>+</sup> 197.1007, found 197.1000.

#### **4-Oxo-4-phenylbutanal-formyl-d1 (3ac)**

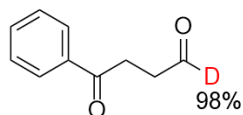

The reaction was carried out according to the general procedure **A**. 4-Oxo-4-phenylbutanal (32.4 mg, 0.2 mmol, 1.0 equiv), 4CzIPN (8.0 mg, 0.01 mmol, 5 mol%), PhCOONa (8.7 mg, 0.06 mmol, 30 mol%), **2d** (60 uL, 1M in EtOAc, 30 mol%), D<sub>2</sub>O (160 uL, 40 equiv) and anhydrous EtOAc (1.0 mL) were used. The reaction mixture was irradiated by Blue LED strip for 36 h. The residue was purified by flash column chromatography (acetone/hexane = 1/3) to afford product (27mg, 84% yield, 98% D ratio by <sup>1</sup>H NMR) as colorless oil. <sup>1</sup>H NMR (400 MHz, CDCl<sub>3</sub>) δ 9.89 (s, 0.02H), 7.98 (d, *J* = 8.1 Hz, 2H), 7.57 (t, *J* = 6.8 Hz, 1H), 7.46 (t, *J* = 7.2 Hz, 2H), 3.32 (t, *J* = 6.2 Hz, 2H), 2.92 (t, *J* = 6.2 Hz, 2H). <sup>13</sup>C NMR (100 MHz, CDCl<sub>3</sub>) δ 200.44 (t, *J* = 26.6 Hz), 197.91, 136.51, 133.41, 128.74, 128.15, 37.50 (t, *J* = 3.8 Hz), 31.08. **HRMS** (ESI) calcd for C<sub>8</sub>H<sub>10</sub>DO<sub>2</sub> [M+H]<sup>+</sup> 164.0816, found 164.0811.

#### **Benzyl 4-oxobutanoate-formyl-d1 (3ad)**

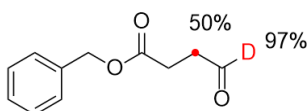

The reaction was carried out according to the general procedure **A**. Benzyl 4-oxobutanoate (38.4 mg, 0.2 mmol, 1.0 equiv), 4CzIPN (8.0 mg, 0.01 mmol, 5 mol%), PhCOONa (8.7 mg, 0.06 mmol, 30 mol%), **2d** (60



uL, 1M in EtOAc, 30 mol%), D<sub>2</sub>O (160 uL, 40 equiv) and anhydrous EtOAc (1.0 mL) were used. The reaction mixture was irradiated by Blue LED strip for 36 h. The residue was purified by flash column chromatography (acetone/hexane = 1/3) to afford product (35mg, 84% yield, 97% D ratio by <sup>1</sup>H NMR) as colorless oil. <sup>1</sup>H NMR (400 MHz, CDCl<sub>3</sub>) δ 9.81 (s, 0.03 H), 7.40-7.26 (m, 5H), 5.13 (s, 2H), 2.81 (t, *J* = 6.4 Hz, 0.95 H), 2.68 (t, *J* = 6.4 Hz, 2H). <sup>13</sup>C NMR (100 MHz, CDCl<sub>3</sub>) δ 199.71 (t, *J* = 26.7 Hz), 172.21, 135.82, 128.69, 128.79, 128.42, 128.33 66.76, 38.43 (t, *J* = 3.8 Hz), 26.67. **HRMS** (ESI) calcd for C<sub>11</sub>H<sub>12</sub>DO<sub>3</sub> [M+H]<sup>+</sup> 194.0922, found 194.0921; calcd for C<sub>11</sub>H<sub>10</sub>D<sub>3</sub>O<sub>3</sub> [M+H]<sup>+</sup> 196.1048, found 196.1047.

#### 4-(3-Oxopropyl)benzonitrile-*formyl-d1* (3ae)

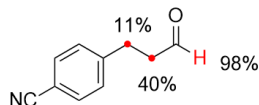

The reaction was carried out according to the general procedure **A**. 4-(3-Oxopropyl)benzonitrile (38.4 mg, 0.2 mmol), 4CzIPN (8.0 mg, 0.01 mmol, 5 mol%), PhCOONa (8.7 mg, 0.06 mmol, 30 mol%), **2d** (60 uL, 1M in EtOAc, 30 mol%), D<sub>2</sub>O (160 uL, 40 equiv) and anhydrous EtOAc (1.0 mL) were used. The reaction mixture was irradiated by Blue LED strip for 36 h. The residue was purified by flash column chromatography (acetone/hexane = 1/3) to afford product (35mg, 84% yield, 97% D ratio by <sup>1</sup>H NMR) as pale yellow oil. <sup>1</sup>H NMR (400 MHz, CDCl<sub>3</sub>) δ 9.81 (s, 0.02 H), 7.58 (d, *J* = 8.0 Hz, 2H), 7.30 (d, *J* = 7.9 Hz, 2H), 3.01 (t, *J* = 6.8 Hz, 1.77H), 2.82 (t, *J* = 7.1 Hz, 1.19H). <sup>13</sup>C NMR (100 MHz, CDCl<sub>3</sub>) δ 200.06 (t, *J* = 26.7 Hz), 146.20, 132.51, 129.32, 118.97, 110.41, 44.47 (t, *J* = 3.7 Hz), 28.06 (t, *J* = 6.1 Hz). **HRMS** (ESI) calcd for C<sub>10</sub>H<sub>9</sub>DNO [M+H]<sup>+</sup> 161.0820, found 161.0813; calcd for C<sub>10</sub>H<sub>8</sub>D<sub>2</sub>NO [M+H]<sup>+</sup> 162.0882, found 162.0876.

#### 3-Cyano-*N*-(3-oxopropyl)benzamide-*formyl-d1* (3af)

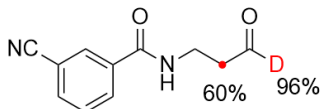

The reaction was carried out according to the general procedure **B**. 3-Cyano-*N*-(3-oxopropyl)benzamide (40.4 mg, 0.2 mmol), 4CzIPN (8.0 mg, 0.01 mmol, 5 mol%), PhCOONa (8.7 mg, 0.06 mmol, 30 mol%), **2d** (60 uL, 1M in EtOAc, 30 mol%), D<sub>2</sub>O (160 uL, 40 equiv) and anhydrous EtOAc (1.0 mL) were used. The reaction mixture was irradiated by Blue LED strip for 36 h. The residue was purified by preparative TLC plate (EtOAc/hexane = 3/1) to afford product (32mg, 80% yield, 96% D ratio by <sup>1</sup>H NMR) as pale yellow oil. <sup>1</sup>H NMR (400 MHz, CDCl<sub>3</sub>) δ 9.86 (s, 0.04 H), 8.05 (s, 1H), 7.96 (d, *J* = 7.7 Hz, 1H), 7.77 (d, *J* = 7.7 Hz, 1H), 7.56 (t, *J* = 7.8 Hz, 1H), 6.85 (br, 1H), 3.74 (d, *J* = 5.4 Hz, 2H), 2.90-2.86 (m, 0.79H). <sup>13</sup>C NMR (100 MHz, CDCl<sub>3</sub>) δ 201.90-201.24 (m), 165.39, 135.56, 134.88, 131.26, 130.96, 129.70, 118.09, 113.11, 42.39-42.86 (m), 33.74 (t, *J* = 5.0 Hz). **HRMS** (ESI) calcd for C<sub>11</sub>H<sub>10</sub>DN<sub>2</sub>O<sub>2</sub> [M+H]<sup>+</sup> 204.0878, found 204.073; calcd for C<sub>10</sub>H<sub>8</sub>D<sub>2</sub>NO [M+H]<sup>+</sup> 205.0941, found 205.0931.

#### 3-(Pyridin-4-yl)propanal-*formyl-d1* (3ag)

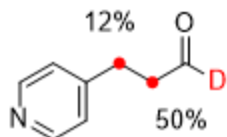

The reaction was carried out according to the general procedure **A**. 3-(Pyridin-4-yl)propanal (27.0 mg, 0.2 mmol, 1.0 equiv), 4CzIPN (8.0 mg, 0.01 mmol, 5 mol%), PhCOONa (8.7 mg, 0.06 mmol, 30 mol%), **2d** (60 uL, 1M in EtOAc, 30 mol%), D<sub>2</sub>O (160 uL, 40 equiv) and anhydrous DCE (1.0 mL) were used. The reaction mixture was irradiated by Blue LED strip for 36 h. The residue was purified by preparative TLC plate (EtOAc/hexane = 3/1) to afford product (21mg, 78% yield, 97% D ratio by <sup>1</sup>H NMR) as pale yellow oil. <sup>1</sup>H NMR (400 MHz, CDCl<sub>3</sub>) δ 9.82 (t, *J* = 1.2 Hz, 1H), 8.52 (d, *J* = 5.7 Hz, 2H), 7.14 (d, *J* = 5.8 Hz, 2H), 2.95 (t, *J* = 7.2 Hz, 1.76H), 2.82 (t, *J* = 7.2 Hz, 1.05H). <sup>13</sup>C NMR (100 MHz, CDCl<sub>3</sub>) δ 200.35-199.73 (m), 149.77,

123.94, 43.84 (t,  $J = 3.7$  Hz), 27.26 (t,  $J = 6.1$  Hz). **HRMS** (ESI) calcd for  $C_8H_9DNO$   $[M+H]^+$  137.0820, found 137.0814.

### 3-(1*H*-indol-3-yl)propanal-formyl-*d*1 (3ah)

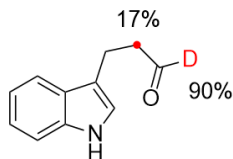

The reaction was carried out according to the general procedure **B**. 3-(1*H*-indol-3-yl)propanal-formyl (prepared according to reported procedure<sup>12</sup>, 34.6 mg, 0.2 mmol, 1.0 equiv), 4CzIPN (8.0 mg, 0.01 mmol, 5 mol%), PhCOONa (8.7 mg, 0.06 mmol, 30 mol%), **2d** (60  $\mu$ L, 1M in EtOAc, 30 mol%),  $D_2O$  (160  $\mu$ L, 40 equiv) and anhydrous EtOAc (1.0 mL) were used. The reaction mixture was irradiated by Blue LED strip for 36 h. The residue was purified by flash column chromatography (EtOAc/hexane/DCM = 3/1/1) to afford product (21mg, 60% yield, 90% D ratio by  $^1H$  NMR) as pale yellow oil.  $^1H$  NMR (400 MHz,  $CDCl_3$ )  $\delta$  9.85 (s, 0.1 H), 8.00 (br, 1H), 7.60 (d,  $J = 7.8$  Hz, 1H), 7.36 (d,  $J = 8.1$  Hz, 1H), 7.22 (t,  $J = 7.1$  Hz, 1H), 7.17–7.12 (m, 1H), 6.98 (s, 1H), 3.13 (t,  $J = 7.2$  Hz, 2H), 2.85 (t,  $J = 7.3$  Hz, 1.67H).  $^{13}C$  NMR (100 MHz,  $CDCl_3$ )  $\delta$  202.45 (t,  $J = 26.4$  Hz), 136.45, 127.19, 122.31, 121.62, 119.54, 118.71, 111.34, 43.94 (t,  $J = 3.7$  Hz), 17.94. **HRMS** (ESI) calcd for  $C_{11}H_{11}DNO$   $[M+H]^+$  175.0976, found 175.0974.

### 3-(5-Methylfuran-2-yl)butanal-formyl-*d*1 (3ai)

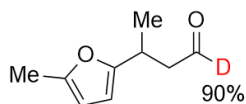

The reaction was carried out according to the general procedure **A**. 3-(5-Methylfuran-2-yl)butanal (30.4 mg, 0.2 mmol, 1.0 equiv), 4CzIPN (16.0 mg, 0.02 mmol, 10 mol%), NaOAc (4.9 mg, 0.06 mmol, 30 mol%) instead of PhCOONa,  $Na_2CO_3$  (6.4 mg, 0.06 mmol, 30 mol%), **2d** (60  $\mu$ L, 1M in EtOAc, 30 mol%),  $D_2O$  (160  $\mu$ L, 40 equiv) and anhydrous EtOAc (1.0 mL) were used. The reaction mixture was irradiated by two 34 W Kessil Blue LEDs instead of LED strips for 6 h. The residue was purified by flash column chromatography (acetone/hexane = 1/19) to afford product (15mg, 50% yield, 90% D ratio by  $^1H$  NMR) as colorless oil.  $^1H$  NMR (400 MHz,  $CDCl_3$ )  $\delta$  9.76 (s, 0.1H), 5.86 (d,  $J = 10.6$  Hz, 2H), 3.37 (dd,  $J = 13.7, 6.9$  Hz, 1H), 2.77 (dd,  $J = 16.7, 6.6$  Hz, 1H), 2.55 (dd,  $J = 16.7, 7.2$  Hz, 1H), 2.24 (s, 3H), 1.29 (d,  $J = 6.9$  Hz, 3H).  $^{13}C$  NMR (100 MHz,  $CDCl_3$ )  $\delta$  201.55 (t,  $J = 26.3$  Hz), 156.56, 150.94, 105.95, 104.95, 49.25 (t,  $J = 3.6$  Hz), 28.08, 19.23, 13.63. **HRMS** (ESI) calcd for  $C_9H_{12}DNO_2$   $[M+H]^+$  154.0973, found 154.0978.

### 3-(Thiophen-2-yl)propanal-formyl-*d*1 (3aj)

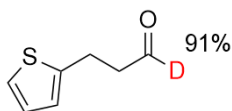

The reaction was carried out according to the general procedure **A**. 3-(Thiophen-2-yl)propanal (28.0 mg, 0.2 mmol, 1.0 equiv), 4CzIPN (8.0 mg, 0.01 mmol, 5 mol%), **2d** (60  $\mu$ L, 1M in EtOAc, 30 mol%),  $D_2O$  (160  $\mu$ L, 40 equiv) and anhydrous EtOAc (1.0 mL) were used. The reaction mixture was irradiated by blue LED strip for 36 h. The residue was purified by flash column chromatography (Et<sub>2</sub>O/hexane = 1/9-1/5) to afford product (27mg, 95% yield, 91% D ratio by  $^1H$  NMR) as colorless oil.  $^1H$  NMR (400 MHz,  $CDCl_3$ )  $\delta$  9.83 (s, 0.09H), 7.13 (d,  $J = 4.5$  Hz, 1H), 6.91-6.91 (m, 1H), 6.82 (s, 1H), 3.18 (t,  $J = 7.2$  Hz, 2H), 2.84 (t,  $J = 7.3$  Hz, 2H).  $^{13}C$  NMR (100 MHz,  $CDCl_3$ )  $\delta$  200.73 (t,  $J = 26.3$  Hz), 143.05, 127.06, 124.88, 123.74, 45.31 (t,  $J = 3.7$  Hz), 22.50. **HRMS** (ESI) calcd for  $C_7H_7DOSNa$   $[M+Na]^+$  164.0251, found 164.0250.

### 3-(2,4-Dimethoxypyrimidin-5-yl)propanal-formyl-*d*1 (3ak)

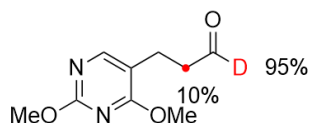

The reaction was carried out according to the general procedure **A**. 3-(2,4-Dimethoxypyrimidin-5-yl)propanal (39.2 mg, 0.2 mmol, 1.0 equiv), 4CzIPN (8.0 mg, 0.01 mmol, 5 mol%), **2d** (60  $\mu$ L, 1M in EtOAc, 30 mol%), D<sub>2</sub>O (160  $\mu$ L, 40 equiv) and anhydrous EtOAc (1.0 mL) were used. The reaction mixture was irradiated by blue LED strip for 36 h. The residue was purified by flash column chromatography (EtOAc/hexane/DCM = 5/3/2) to afford product (24mg, 62% yield, 95% D ratio by <sup>1</sup>H NMR) as pale yellow oil. <sup>1</sup>H NMR (400 MHz, CDCl<sub>3</sub>)  $\delta$  9.79 (t, *J* = 1.2 Hz, 0.05H), 8.03 (s, 1H), 3.97 (d, *J* = 1.2 Hz, 3H), 3.95 (d, *J* = 1.3 Hz, 3H), 2.81–2.75 (m, 2H), 2.73–2.64 (m, 1.8H). <sup>13</sup>C NMR (100 MHz, CDCl<sub>3</sub>)  $\delta$  200.95 (t, *J* = 26.4 Hz), 169.39, 164.51, 157.36, 113.56, 54.81 (q, *J* = 3.6 Hz), 54.02 (q, *J* = 3.5 Hz), 42.85 (t, *J* = 3.7 Hz), 19.60. **HRMS** (ESI) calcd for C<sub>9</sub>H<sub>11</sub>DN<sub>2</sub>O<sub>3</sub> [M+H]<sup>+</sup> 198.0983, found 198.0978.

#### Dodecanal-formyl-d1 (3al)

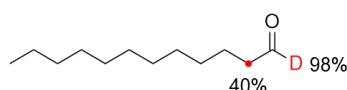

The reaction was carried out according to the general procedure **A**. Dodecanal (36.8 mg, 0.2 mmol, 1.0 equiv), 4CzIPN (8.0 mg, 0.01 mmol, 5 mol%), **2d** (60  $\mu$ L, 1M in EtOAc, 30 mol%), D<sub>2</sub>O (160  $\mu$ L, 40 equiv) and anhydrous EtOAc (1.0 mL) were used. The reaction mixture was irradiated by blue LED strip for 36 h. The residue was purified by flash column chromatography (Et<sub>2</sub>O/hexane/ = 1/19) to afford product (24mg, 66% yield, 98% D ratio by <sup>1</sup>H NMR) as colorless oil. <sup>1</sup>H NMR (400 MHz, CDCl<sub>3</sub>)  $\delta$  9.79 (t, *J* = 1.2 Hz, 0.05H), 2.30 (t, *J* = 7.4 Hz, 1.29H), 1.57–1.47 (m, 2H), 1.15 (s, 16H), 0.77 (t, *J* = 6.8 Hz, 3H). <sup>13</sup>C NMR (100 MHz, CDCl<sub>3</sub>)  $\delta$  202.78 (t, *J* = 26.4 Hz), 43.90 (t, *J* = 3.5 Hz), 32.05, 29.74, 29.73, 29.58, 29.51, 29.47, 29.32, 22.83, 22.21, 14.26. **HRMS** (ESI) calcd for C<sub>22</sub>H<sub>23</sub>DONa [M+Na]<sup>+</sup> 208.1782, found 207.1785.

#### Olealdehyde-formyl-d1 (3am)

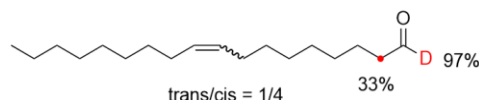

The reaction was carried out according to the general procedure **A**. Olealdehyde (53.2 mg, 0.2 mmol, 1.0 equiv), 4CzIPN (8.0 mg, 0.01 mmol, 5 mol%), **2d** (60  $\mu$ L, 1M in EtOAc, 30 mol%), D<sub>2</sub>O (160  $\mu$ L, 40 equiv) and anhydrous EtOAc (1.0 mL) were used. The reaction mixture was irradiated by blue LED strip for 36 h. The residue was purified by flash column chromatography (Et<sub>2</sub>O/hexane/ = 1/19) to afford product (35mg, 65% yield, 97% D ratio by <sup>1</sup>H NMR, trans/cis = 1/4 by <sup>1</sup>H NMR) as colorless oil. <sup>1</sup>H NMR (400 MHz, CDCl<sub>3</sub>)  $\delta$  9.76 (t, *J* = 1.7 Hz, 0.03H), 5.43–5.35 (m, 1.37H, *cis*), 5.35–5.29 (m, 0.33H, *trans*), 2.41 (t, *J* = 7.4 Hz, 1.34H), 2.01–1.93 (m, 4H), 1.67–1.57 (m, 2H), 1.28 (dd, *J* = 17.4, 2.6 Hz, 20H), 0.88 (t, *J* = 6.9 Hz, 3H). <sup>13</sup>C NMR (100 MHz, CDCl<sub>3</sub>)  $\delta$  202.75 (t, *J* = 25.9 Hz), 130.66 (*cis*), 130.30 (*cis*), 130.18 (*trans*), 129.83 (*trans*), 43.88 (t, *J* = 3.5 Hz), 32.75, 32.68, 32.05, 29.80, 29.68, 29.64, 29.47, 29.36, 29.33, 29.29, 29.05, 22.83, 22.20, 14.26. **HRMS** (ESI) calcd for C<sub>18</sub>H<sub>34</sub>DO [M+H]<sup>+</sup> 268.2745, found 268.2746.

#### (*E*)-6-(4-hydroxy-6-methoxy-7-methyl-3-oxo-1,3-dihydroisobenzofuran-5-yl)-4-methylhex-4-enal-formyl-d1 (3an)

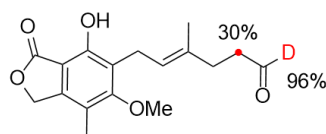

The reaction was carried out according to the general procedure **B**. (*E*)-6-(4-Hydroxy-6-methoxy-7-methyl-3-oxo-1,3-dihydroisobenzofuran-5-yl)-4-methylhex-4-enal (prepared according to reported procedure<sup>10</sup>, 30.4 mg, 0.1 mmol, 1.0 equiv), 4CzIPN (4.0 mg, 0.005 mmol, 5 mol%), **2d** (30  $\mu$ L, 1M in EtOAc, 30 mol%),



D<sub>2</sub>O (80 uL, 40 equiv) and anhydrous EtOAc (1.0 mL) were used. The reaction mixture was irradiated by blue LED strip for 36 h. The residue was purified by flash column chromatography (EtOAc/hexane = 3/7) to afford product (26mg, 85% yield, 96% D ratio by <sup>1</sup>H NMR) as white solid. <sup>1</sup>H NMR (400 MHz, CDCl<sub>3</sub>) δ 9.72 (s, 0.04H), 5.24 (t, *J* = 7.0 Hz, 1H), 5.19 (s, 2H), 3.75 (s, 3H), 3.38 (d, *J* = 6.9 Hz, 2H), 2.59–2.44 (m, 1.4H), 2.35–2.30 (m, 2H), 2.14 (s, 3H), 1.80 (s, 3H). <sup>13</sup>C NMR (100 MHz, CDCl<sub>3</sub>) δ 202.57–202.02 (m), 173.03, 163.78, 153.74, 144.19, 133.97, 123.05, 122.10, 116.86, 106.52, 70.18, 61.13, 42.21–41.43 (m), 31.83 (t, *J* = 5.6 Hz), 22.72, 16.41, 11.70. **HRMS** (ESI) calcd for C<sub>17</sub>H<sub>20</sub>DO<sub>5</sub> [M+H]<sup>+</sup> 306.1446, found 306.1439.

**(*R*)-4-((3*R*,5*S*,7*S*,8*R*,9*S*,10*S*,13*R*,14*S*,17*R*)-3,7-dihydroxy-10,13-dimethylhexadecahydro-1*H*-cyclopenta[*a*]phenanthren-17-yl)pentanal-*formyl-d1* (3ao)**

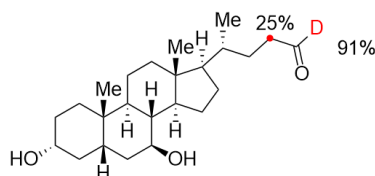

The reaction was carried out according to the general procedure **B**. (*R*)-4-((3*R*,5*S*,7*S*,8*R*,9*S*,10*S*,13*R*,14*S*,17*R*)-3,7-dihydroxy-10,13-dimethylhexadecahydro-1*H*-cyclopenta[*a*]phenanthren-17-yl)pentanal (prepared according to reported procedure<sup>10</sup>, 37.7 mg, 0.1 mmol, 1.0 equiv), 4CzIPN (4.0 mg, 0.005 mmol, 5 mol%), **2d** (30 uL, 1M in EtOAc, 30 mol%), D<sub>2</sub>O (80 uL, 40 equiv) and anhydrous DCE (1.0 mL) were used. The reaction mixture was irradiated by blue LED strip for 36 h. The residue was purified by flash column chromatography (EtOAc/hexane = 1/1-3/1) to afford product (23mg, 60% yield, 91% D ratio by <sup>1</sup>H NMR) as white solid. <sup>1</sup>H NMR (400 MHz, CDCl<sub>3</sub>) δ 9.79 (s, 0.09H), 3.66–3.52 (m, 2H), 2.49–2.41 (m, 0.75H), 2.38–2.30 (m, 0.75H), 2.01–1.98 (m, 1H), 1.92–1.75 (m, 7H), 1.68–1.57 (m, 4H), 1.53–1.40 (m, 6H), 1.36–1.22 (m, 6H), 1.17–1.01 (m, 3H), 0.94–0.89 (m, 6H), 0.67 (s, 3H). <sup>13</sup>C NMR (100 MHz, CDCl<sub>3</sub>) δ 203.00 (t, *J* = 25.9 Hz), 71.58, 71.50, 55.85, 55.08, 43.91, 42.57, 40.90 (t, *J* = 2.8 Hz), 40.26, 39.31, 37.43, 37.02, 35.38, 35.06, 34.22, 30.47, 28.81, 28.09, 27.03, 23.52, 21.31, 18.63, 12.28. **HRMS** (ESI) calcd for C<sub>24</sub>H<sub>39</sub>DO<sub>3</sub>Na [M+Na]<sup>+</sup> 400.2932, found 400.2918.

**4-Formylphenyl 2-(1-(4-chlorobenzoyl)-5-methoxy-2-methyl-1*H*-indol-3-yl)acetate-*formyl-d1* (3ap)**

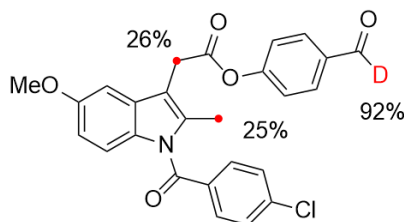

The reaction was carried out according to the general procedure **A**. (*R*)-4-((3*R*,5*S*,7*S*,8*R*,9*S*,10*S*,13*R*,14*S*,17*R*)-3,7-dihydroxy-10,13-dimethylhexadecahydro-1*H*-cyclopenta[*a*]phenanthren-17-yl)pentanal (46.1 mg, 0.1 mmol, 1.0 equiv), 4CzIPN (4.0 mg, 0.005 mmol, 5 mol%), **2d** (30 uL, 1M in EtOAc, 30 mol%), D<sub>2</sub>O (80 uL, 40 equiv) and anhydrous DCE/anhydrous EtOAc (0.8 ml/0.2 mL) were used. The reaction mixture was irradiated by blue LED strip for 36 h. The residue was purified by flash column chromatography (EtOAc/hexane/DCM= 1/3/1) to afford product (23mg, 50% yield, 92% D ratio by <sup>1</sup>H NMR) as white solid. <sup>1</sup>H NMR (400 MHz, CDCl<sub>3</sub>) δ 9.98 (s, 0.08H), 7.90 (d, *J* = 8.5 Hz, 2H), 7.68 (d, *J* = 8.4 Hz, 2H), 7.48 (d, *J* = 8.3 Hz, 2H), 7.25 (d, *J* = 8.1 Hz, 2H), 7.04 (s, 1H), 6.88 (d, *J* = 9.0 Hz, 1H), 6.70 (dd, *J* = 9.0, 2.1 Hz, 1H), 3.94 (s, 1.49H), 3.84 (s, 3H), 2.47 (s, 2.25H). <sup>13</sup>C NMR (100 MHz, CDCl<sub>3</sub>) δ 190.65 (t, *J* = 26.4 Hz), 168.74, 168.43, 156.30, 155.46, 139.61, 136.56, 134.16 (t, *J* = 3.4 Hz), 133.85, 131.36, 131.34, 131.00, 130.50, 129.33, 122.36, 115.22, 111.91, 111.59, 101.35, 55.90, 30.74, 13.56. **HRMS** (ESI) calcd for C<sub>26</sub>H<sub>20</sub>DCINO<sub>5</sub> [M+H]<sup>+</sup> 463.1166, found 463.1151; calcd for C<sub>26</sub>H<sub>19</sub>D<sub>2</sub>CINO<sub>5</sub> [M+Na]<sup>+</sup> 464.1228, found 464.1207; calcd for C<sub>26</sub>H<sub>18</sub>D<sub>3</sub>CINO<sub>5</sub> [M+Na]<sup>+</sup> 465.1291, found 465.1260.

**(3*aR*,4*R*,6*S*,6*aS*)-6-methoxy-2,2-dimethyl-*N*-(3-oxopropyl)tetrahydrofuro[3,4-*d*][1,3]dioxole-4-carboxamide-*formyl-d1* (3aq)**

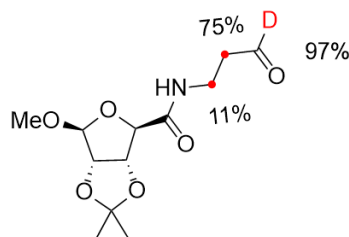

The reaction was carried out according to the general procedure **B**. (3*aR*,4*R*,6*S*,6*aS*)-6-methoxy-2,2-dimethyl-*N*-(3-oxopropyl)tetrahydrofuro[3,4-*d*][1,3]dioxole-4-carboxamide (54.6 mg, 0.2 mmol, 1.0 equiv), 4CzIPN (8.0 mg, 0.01 mmol, 5 mol%), **2d** (60  $\mu$ L, 1M in EtOAc, 30 mol%), D<sub>2</sub>O (160  $\mu$ L, 40 equiv) and anhydrous EtOAc (1.0 mL) were used. The reaction mixture was irradiated by blue LED strip for 36 h. The residue was purified by flash column chromatography (EtOAc/MeOH= 19/1-9/1) to afford product (30mg, 55% yield, 97% D ratio by <sup>1</sup>H NMR) as pale yellow oil. <sup>1</sup>H NMR (400 MHz, CDCl<sub>3</sub>)  $\delta$  9.80 (s, 0.03H), 6.98 (br, 1H), 5.06 (dd, *J* = 6.0, 1.3 Hz, 1H), 5.04 (s, 1H), 4.57 (s, 1H), 4.51 (d, *J* = 6.0 Hz, 1H), 3.55 (t, *J* = 5.5 Hz, 1.77H), 3.44 (s, 3H), 2.75-2.68 (m, 0.49H), 1.47 (s, 3H), 1.31 (s, 3H). <sup>13</sup>C NMR (100 MHz, CDCl<sub>3</sub>)  $\delta$  201.18-200.58 (m), 170.37, 112.88, 111.66, 86.63, 84.58, 82.75, 56.65, 43.71-43.10 (m), 32.52-32.42 (m), 26.60, 25.07. **HRMS** (ESI) calcd for C<sub>12</sub>H<sub>18</sub>DNO<sub>6</sub>Na [M+Na]<sup>+</sup> 297.1167, found 297.1151; calcd for C<sub>12</sub>H<sub>18</sub>D<sub>2</sub>NO<sub>6</sub> [M+H]<sup>+</sup> 267.1411, found 276.1397.

#### Methyl *N*<sup>2</sup>-((benzyloxy)carbonyl)-1-(4-oxobutanoyl-4-*d*)-*L*-tryptophanate-formyl-*d*1 (**3ar**)

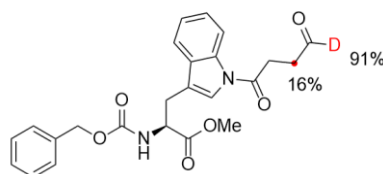

The reaction was carried out according to the general procedure **B**. Methyl *N*<sup>2</sup>-((benzyloxy)carbonyl)-1-(4-oxobutanoyl-4-*d*)-*L*-tryptophanate (43.7 mg, 0.1 mmol, 1.0 equiv), 4CzIPN (4.0 mg, 0.005 mmol, 5 mol%), **2d** (30  $\mu$ L, 1M in EtOAc, 30 mol%), D<sub>2</sub>O (80  $\mu$ L, 40 equiv) and anhydrous EtOAc/anhydrous DCE (0.5 mL/0.5 mL) were used. The reaction mixture was irradiated by blue LED strip for 36 h. The residue was purified by preparative TLC plate (EtOAc/hexane/DCM= 1/2/2) to afford product (29mg, 66% yield, 91% D ratio by <sup>1</sup>H NMR) as pale yellow oil. <sup>1</sup>H NMR (400 MHz, CDCl<sub>3</sub>)  $\delta$  9.90 (s, 0.09H), 8.37 (d, *J* = 8.2 Hz, 1H), 7.47 (d, *J* = 7.8 Hz, 1H), 7.36–7.23 (m, 7H), 5.41 (d, *J* = 8.0 Hz, 1H), 5.12 (dd, *J* = 30.3, 12.2 Hz, 2H), 4.77 (dd, *J* = 7.6 Hz, 6.0 Hz, 1H), 3.70 (s, 3H), 3.36–3.09 (m, 4H), 2.97 (t, *J* = 6.3 Hz, 1.68H). <sup>13</sup>C NMR (100 MHz, CDCl<sub>3</sub>)  $\delta$  199.64 (t, *J* = 26.8 Hz), 172.05, 169.44, 155.82, 136.32, 135.94, 130.44, 128.68, 128.37, 128.25, 125.73, 123.89, 122.67, 118.87, 117.41, 116.77, 67.19, 53.91, 52.72 (q, *J* = 3.7 Hz), 37.93, 37.74 (t, *J* = 3.3 Hz), 28.29, 28.19. **HRMS** (ESI) calcd for C<sub>24</sub>H<sub>24</sub>DN<sub>2</sub>O<sub>6</sub> [M+H]<sup>+</sup> 438.1770, found 438.1759.

#### *tert*-Butyl (S)-(1-oxo-1-((2-oxo-2-((3-oxopropyl)amino)ethyl)amino)-3-phenylpropan-2-yl)carbamate-formyl-*d*1 (**3as**)

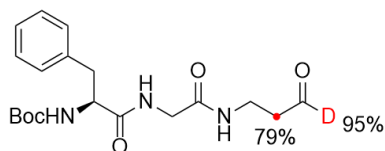

The reaction was carried out according to the general procedure **B**. *tert*-Butyl (S)-(1-oxo-1-((2-oxo-2-((3-oxopropyl)amino)ethyl)amino)-3-phenylpropan-2-yl)carbamate (75.4mg, 0.2 mmol, 1.0 equiv), 4CzIPN (8.0 mg, 0.01 mmol, 5 mol%), **2d** (60  $\mu$ L, 1M in EtOAc, 30 mol%), D<sub>2</sub>O (160  $\mu$ L, 40 equiv) and anhydrous EtOAc anhydrous DCE (0.5 mL/0.5 mL) were used. The reaction mixture was irradiated by blue LED strip for 36 h. The residue was purified by flash column chromatography (EtOAc/MeOH = 9/1) to afford product (66mg, 88% yield, 95% D ratio by <sup>1</sup>H NMR) as colorless oil. <sup>1</sup>H NMR (400 MHz, CDCl<sub>3</sub>)  $\delta$  9.75 (s, 0.09H), 7.32-7.18

(m, 5H), 6.85 (s, 2H), 5.17 (s, 1H), 4.31 (dd,  $J = 14.1, 7.1$  Hz, 1H), 3.90 (dd,  $J = 16.7, 6.0$  Hz, 1H), 3.78 (dd,  $J = 16.7, 5.5$  Hz, 1H), 3.51-3.48 (m, 2H), 3.12 (dd,  $J = 13.9, 6.3$  Hz, 1H), 2.98 (dd,  $J = 13.6, 7.7$  Hz, 1H), 2.68 (t,  $J = 6.2$  Hz, 0.42H), 1.38 (s, 9H).  $^{13}\text{C}$  NMR (100 MHz,  $\text{CDCl}_3$ )  $\delta$  200.95 (t,  $J = 26.2$  Hz), 172.14, 169.03, 155.94, 136.51, 129.31, 128.86, 127.21, 80.71, 56.41, 43.21, 38.13, 33.09, 28.38. **HRMS** (ESI) calcd for  $\text{C}_{19}\text{H}_{27}\text{DN}_3\text{O}_5$   $[\text{M}+\text{H}]^+$  379.2086, found 379.2075;  $\text{C}_{19}\text{H}_{26}\text{D}_2\text{N}_3\text{O}_5$   $[\text{M}+\text{H}]^+$  380.2149, found 380.2136;  $\text{C}_{19}\text{H}_{25}\text{D}_3\text{N}_3\text{O}_5$   $[\text{M}+\text{H}]^+$  381.2212, found 381.2195.

## 9. Spectra data

### 4-Methylbenzaldehyde-*formyl-d1* (3a)

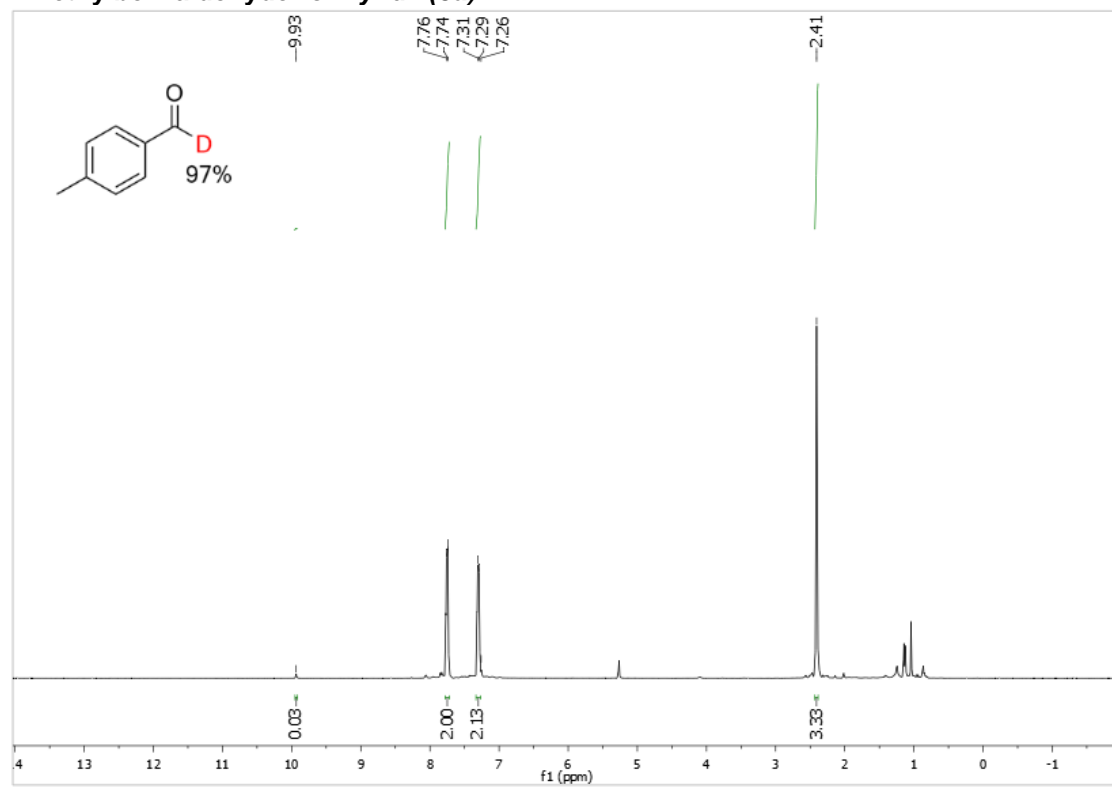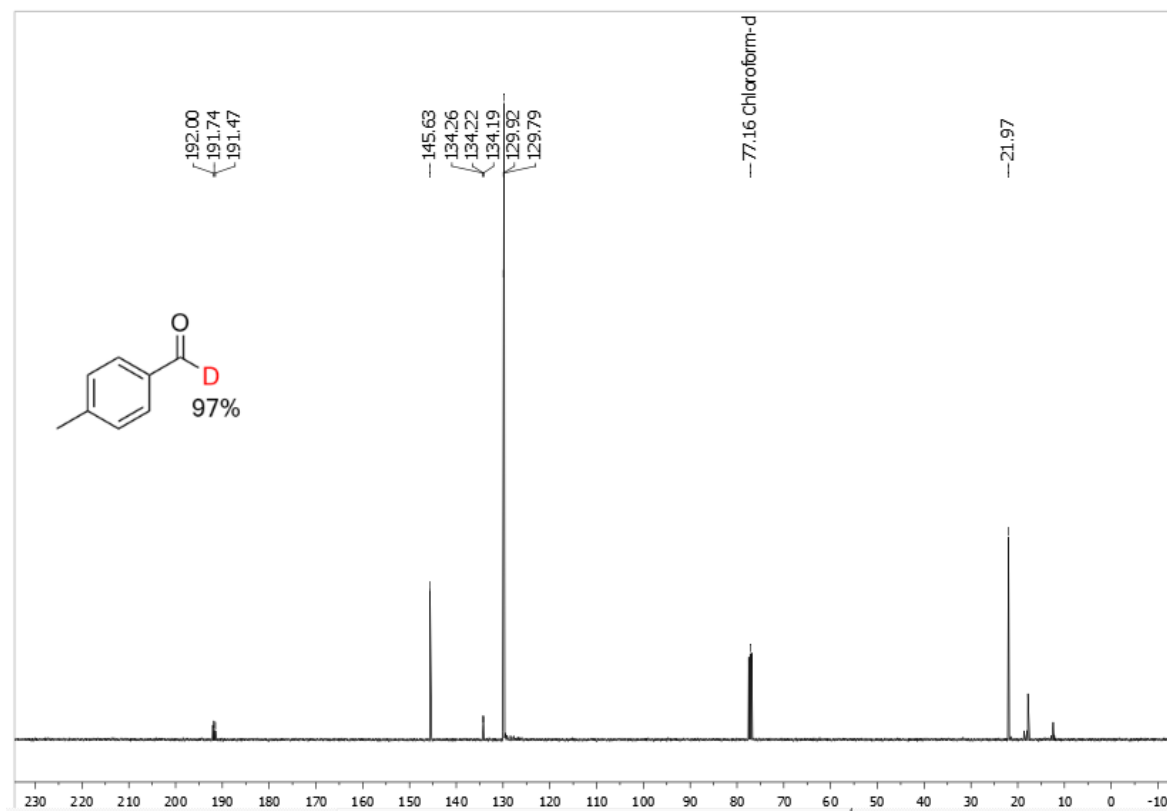

**1-Naphthaldehyde-formyl-d1 (3b)**

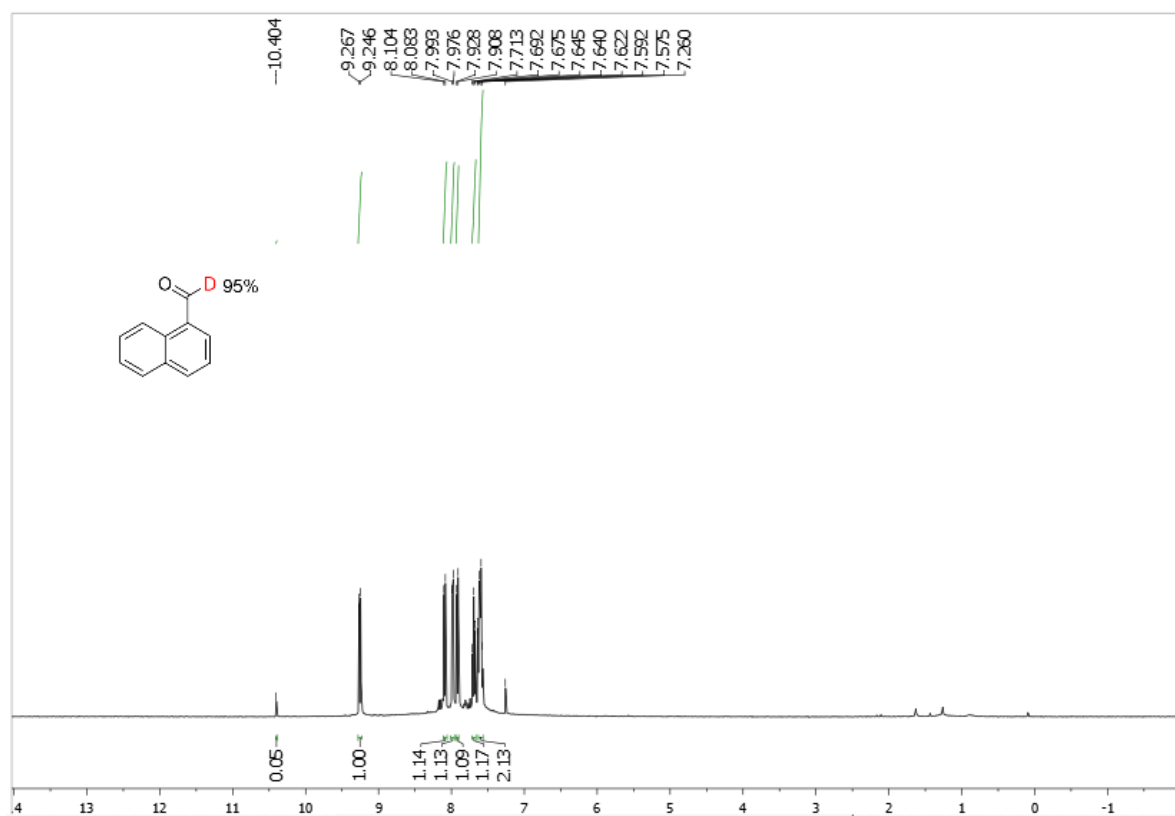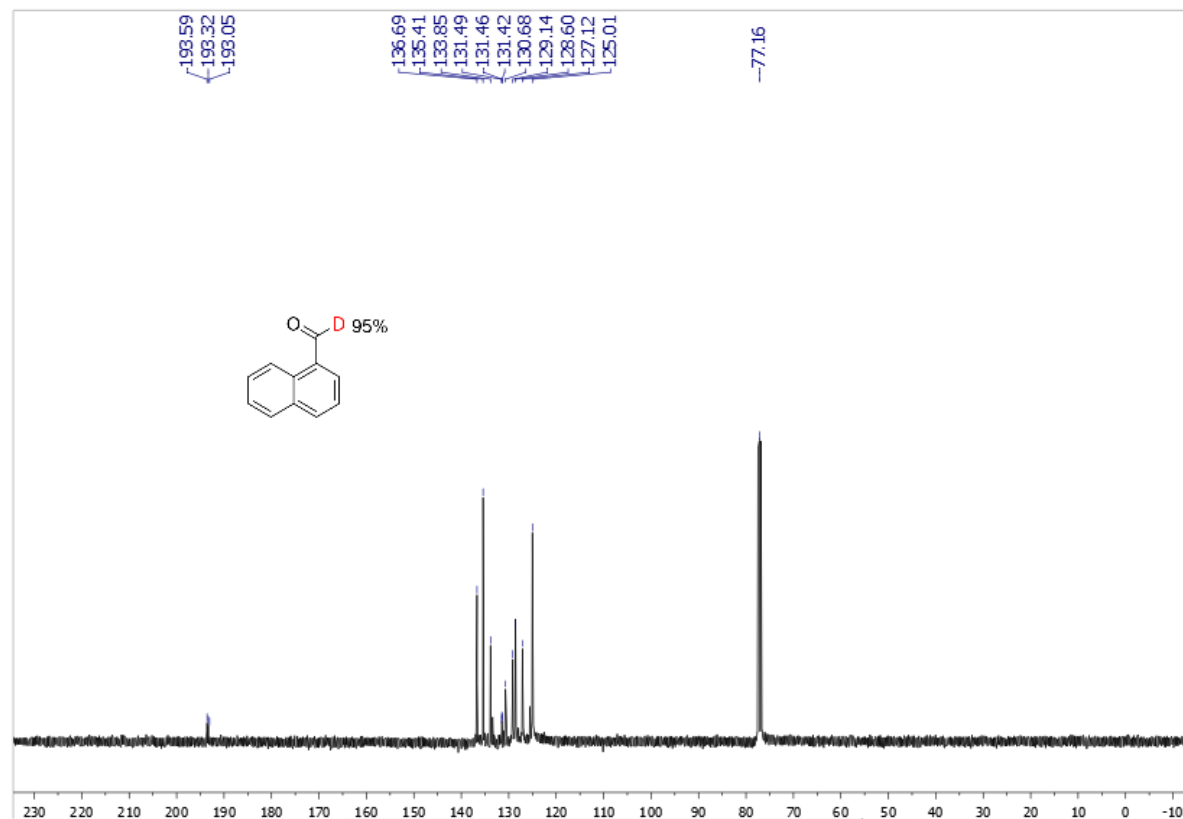

**[1,1'-Biphenyl]-4-carbaldehyde-formyl-d1 (3c)**

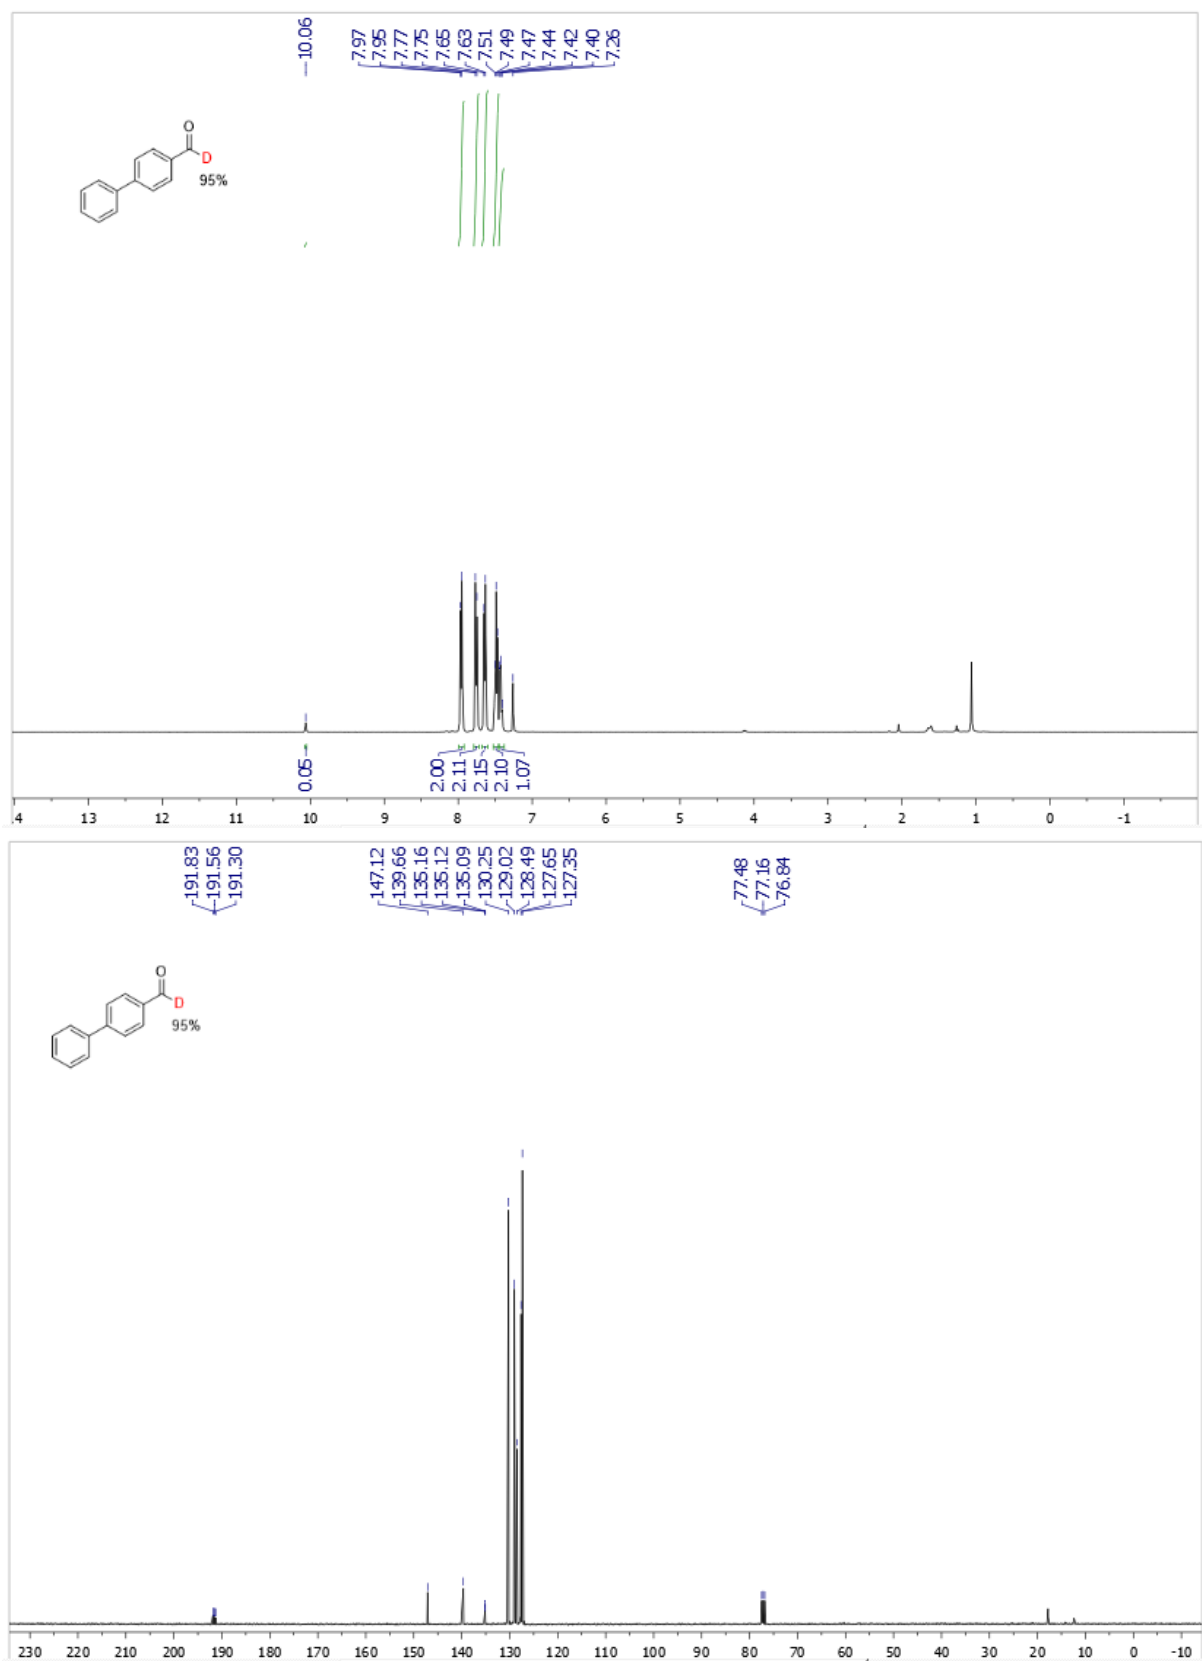

**4-Methoxybenzaldehyde-formyl-d1 (3d)**

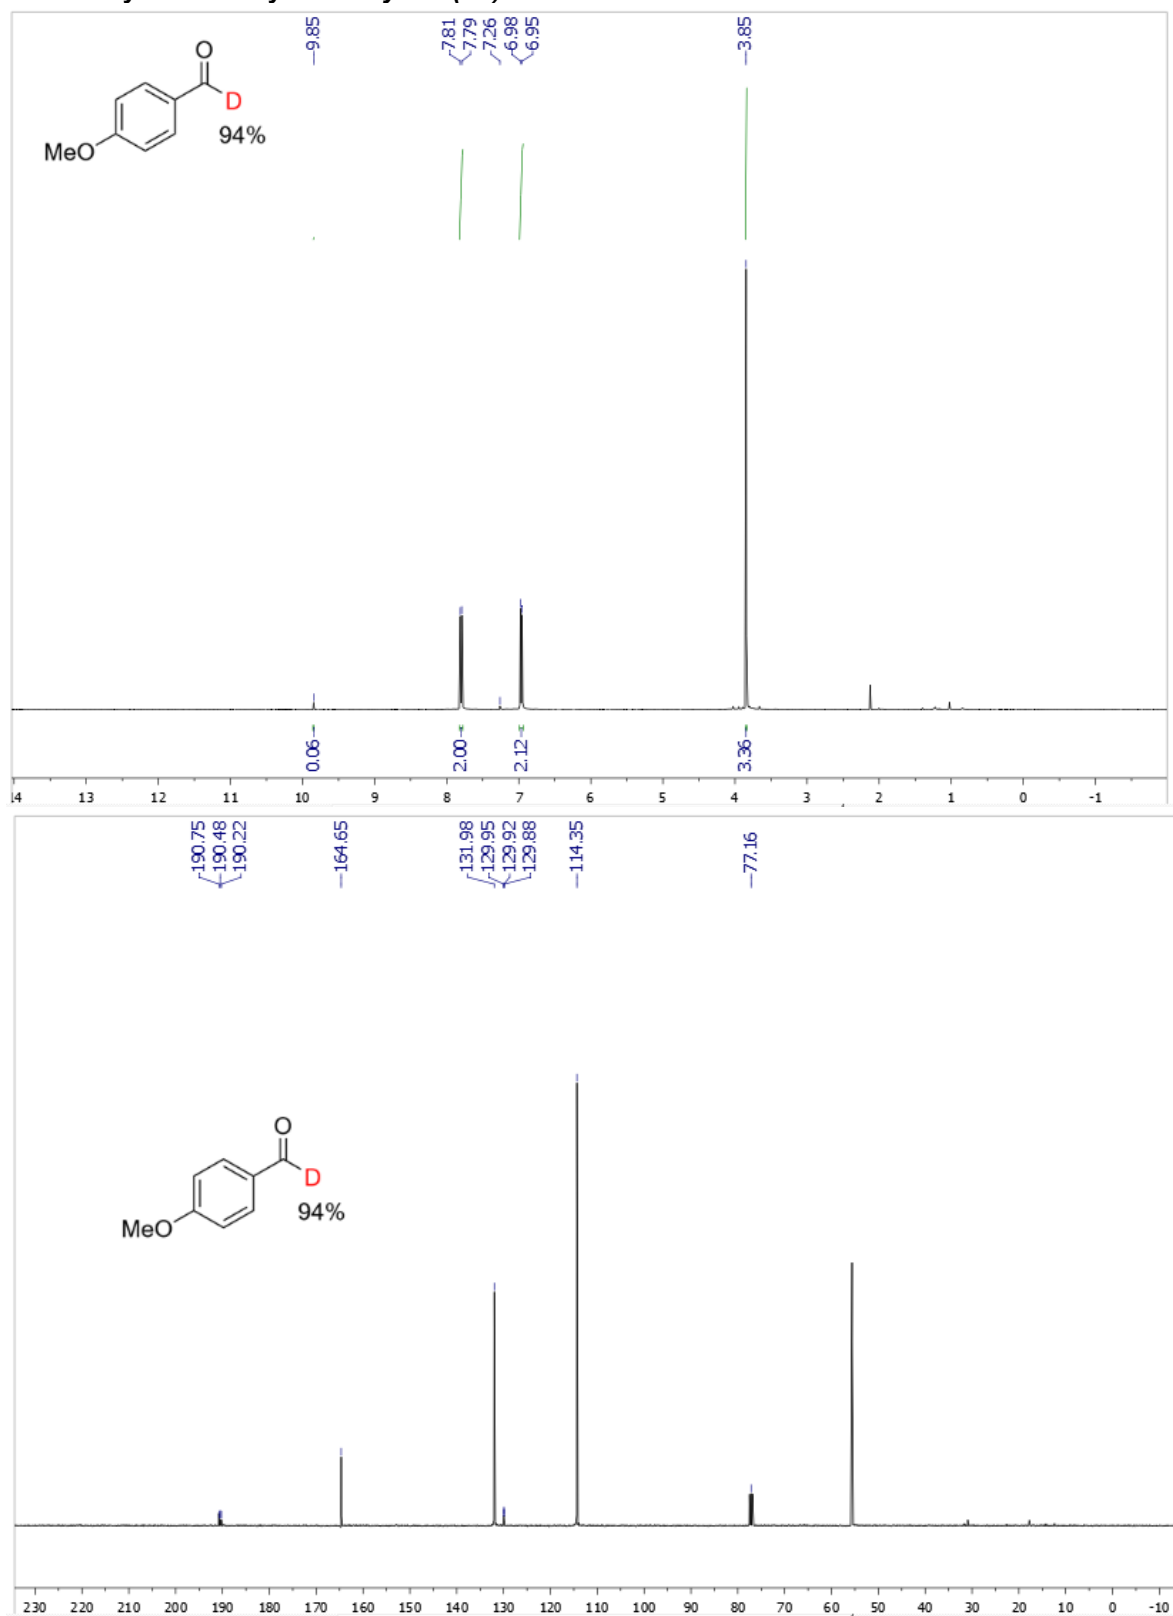

**2-Methoxybenzaldehyde-*formyl-d1* (3e)**

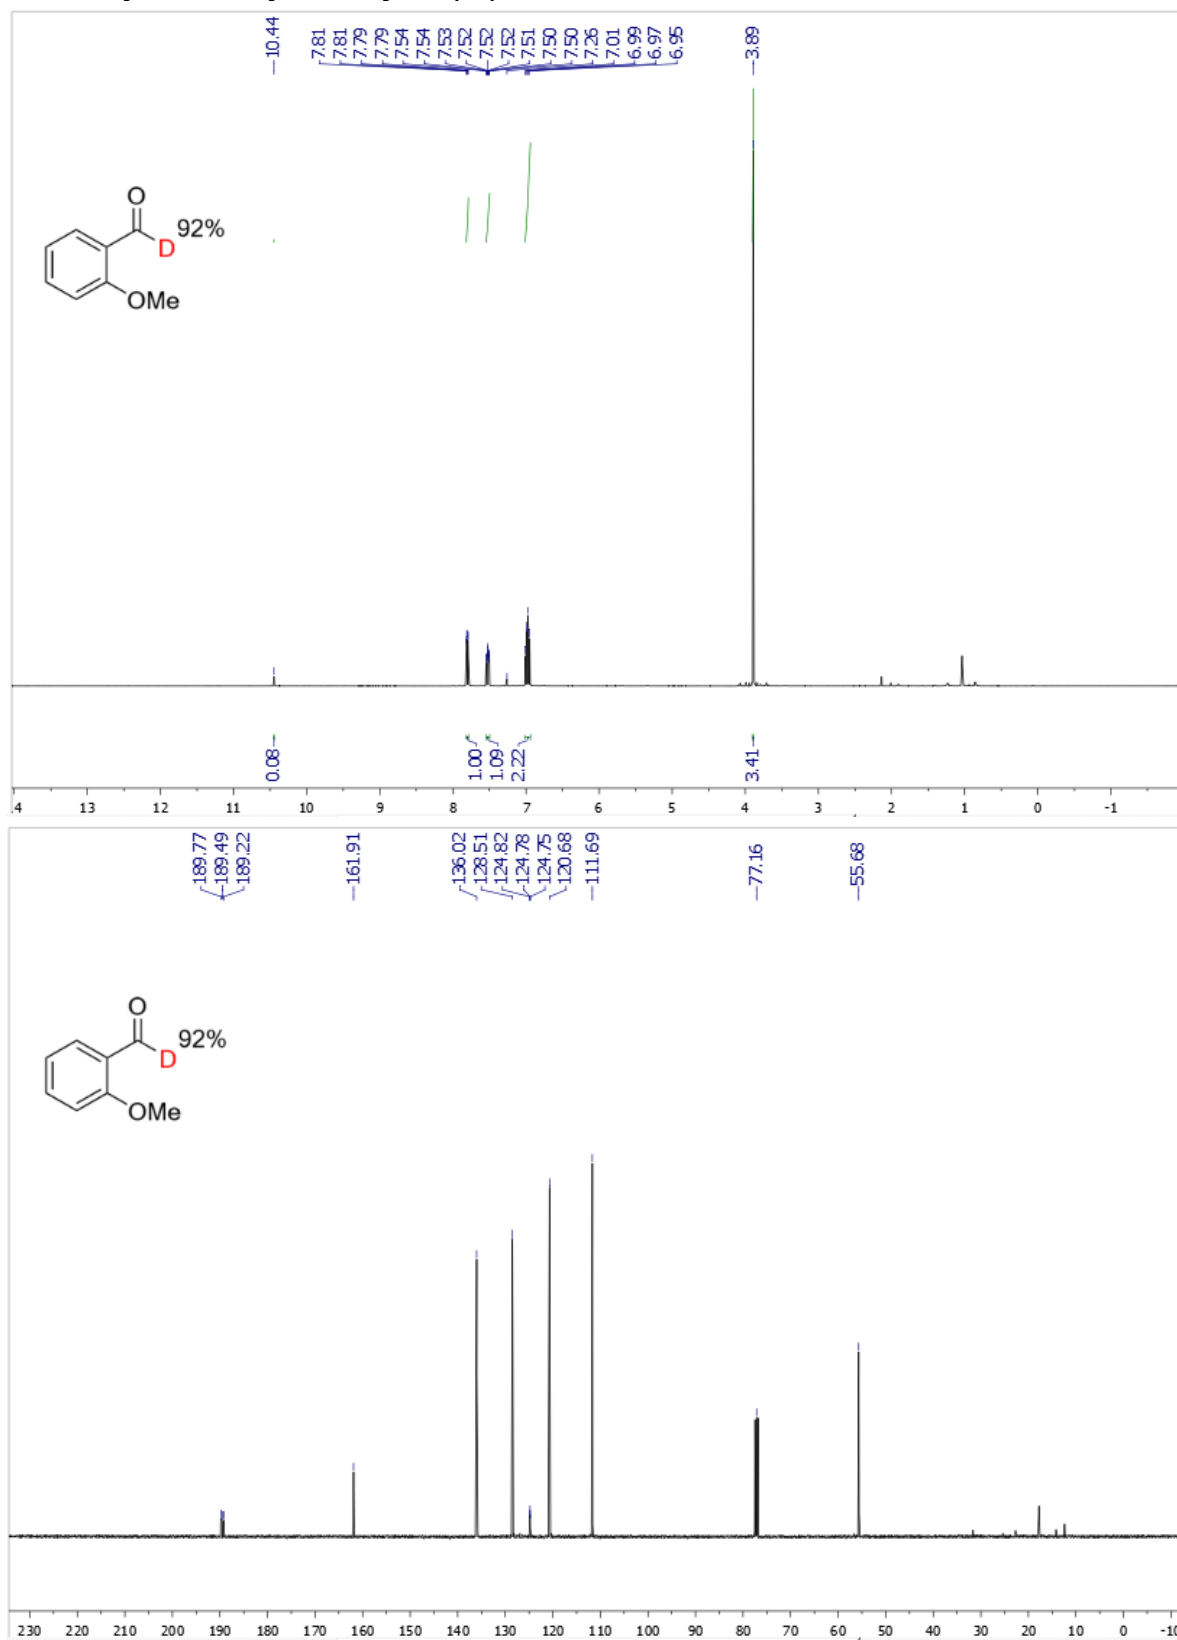



2,4,6-Trimethoxybenzaldehyde--*formyl-d1* (3f)

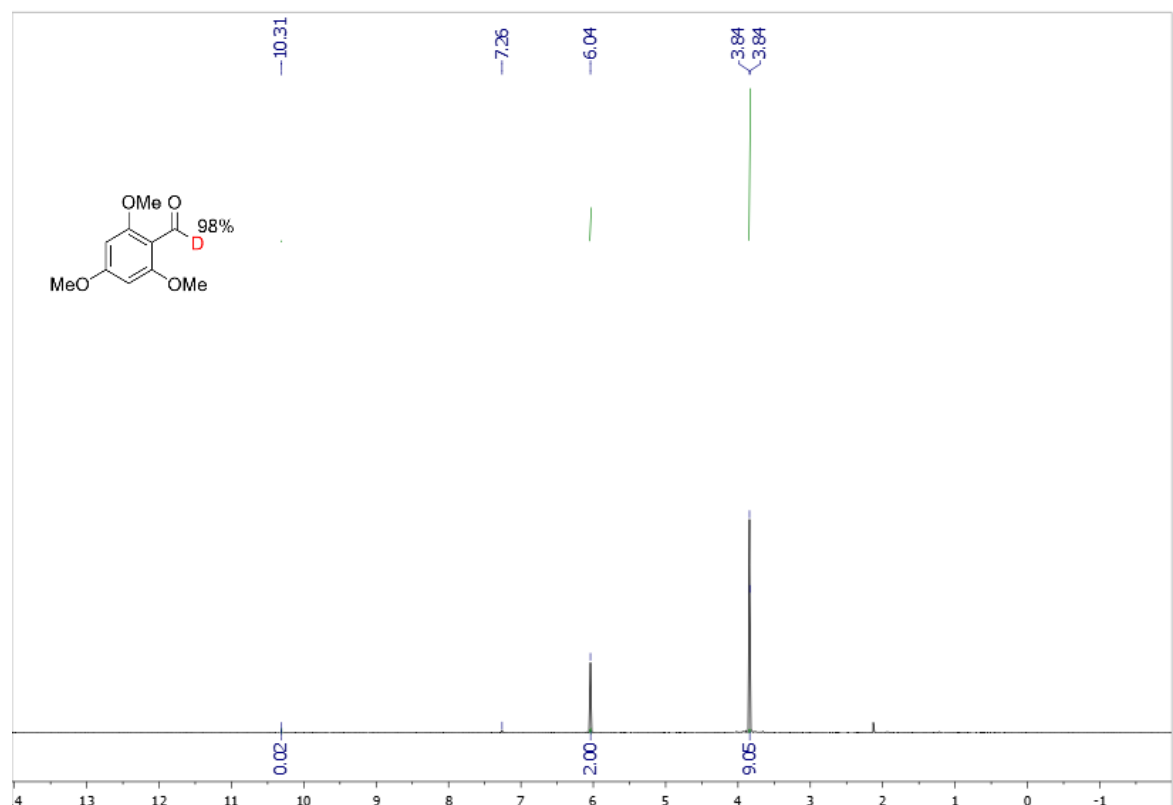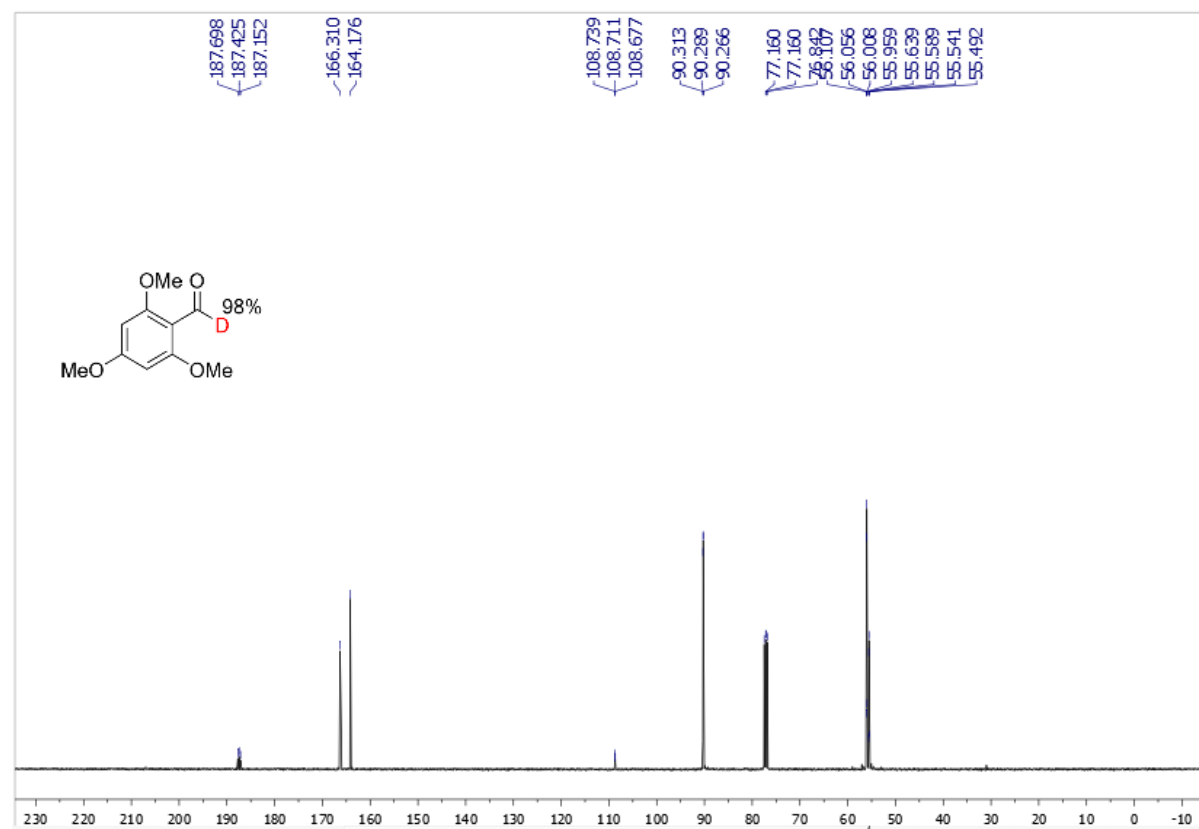

**4-Chlorobenzaldehyde-*formyl-d1* (3g)**

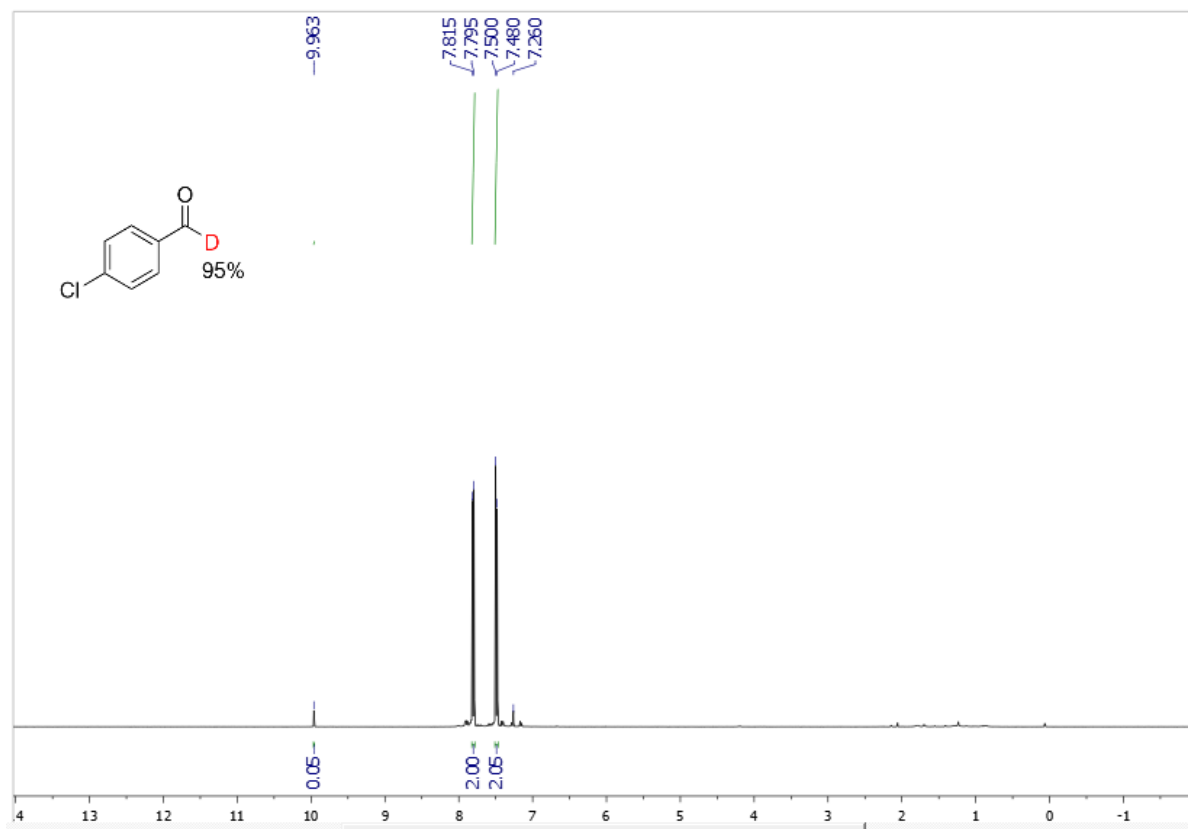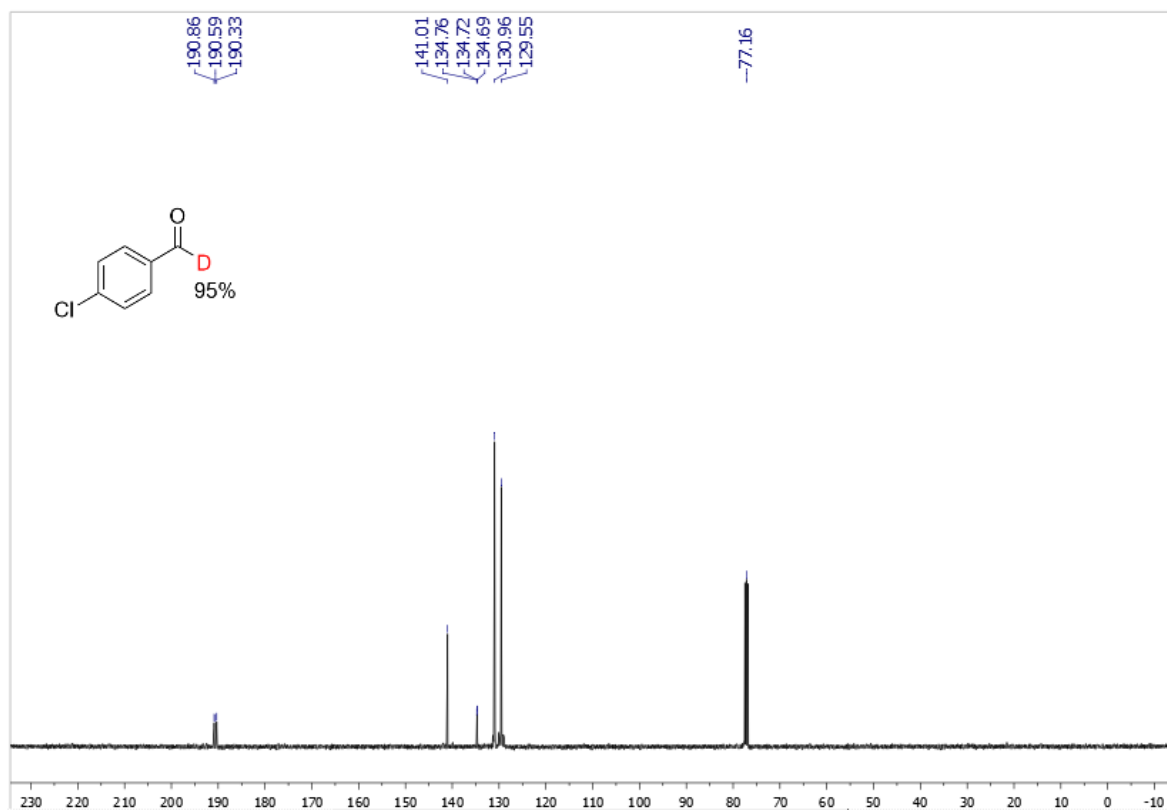

**4-Bromobenzaldehyde-formyl-d1 (3h)**

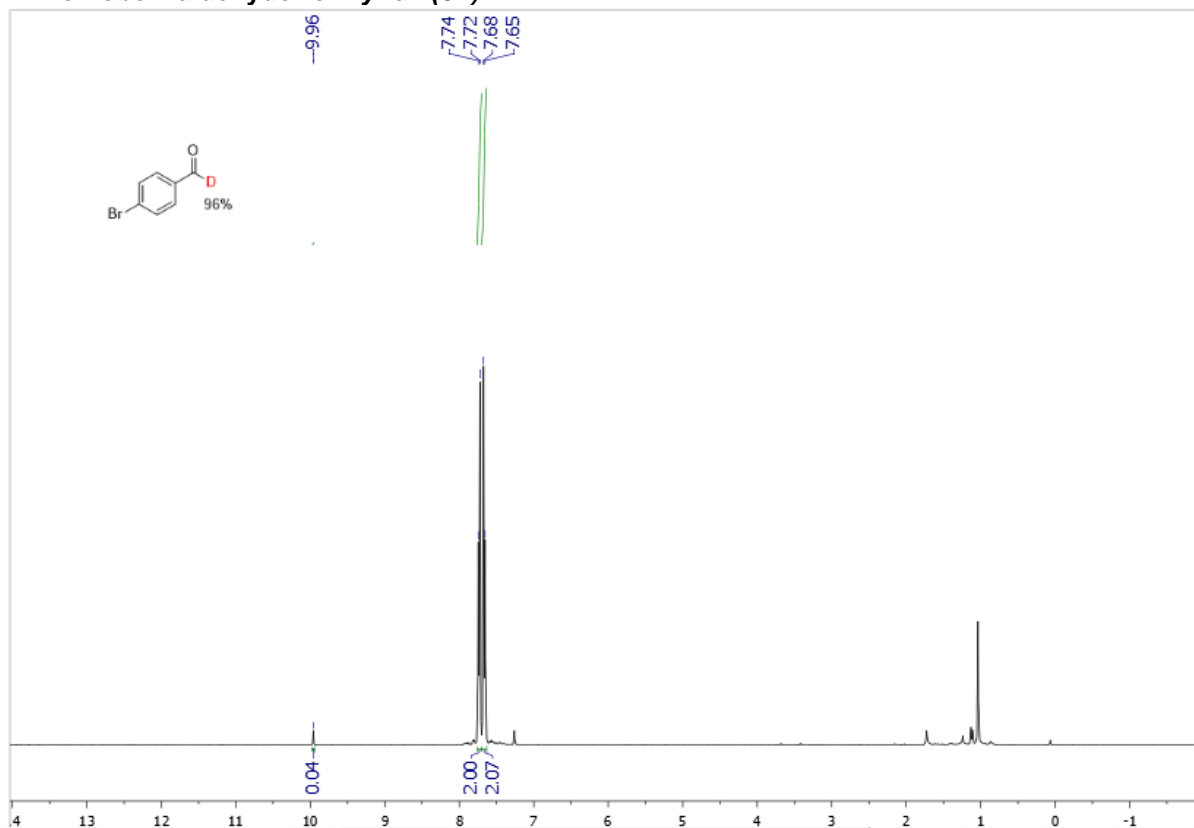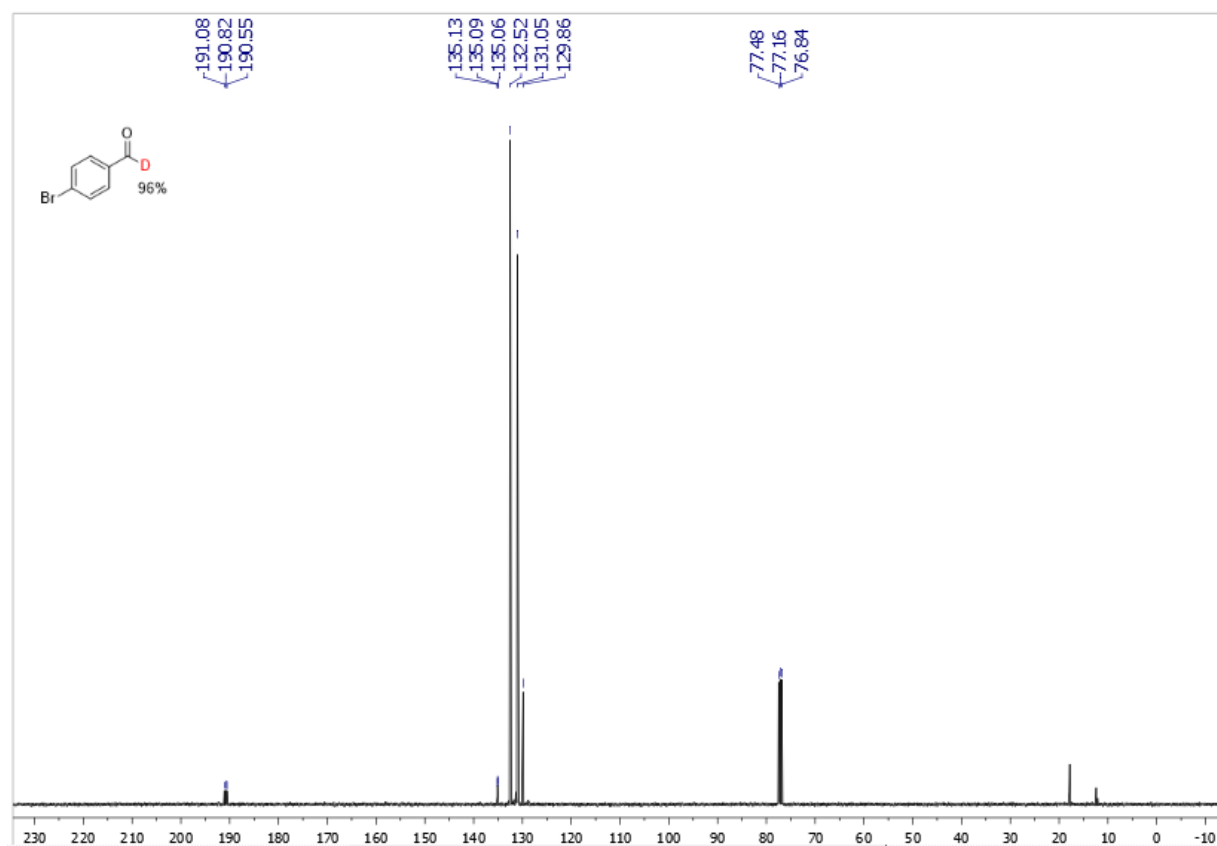

4-Iodobenzaldehyde-formyl-d1 (3i)

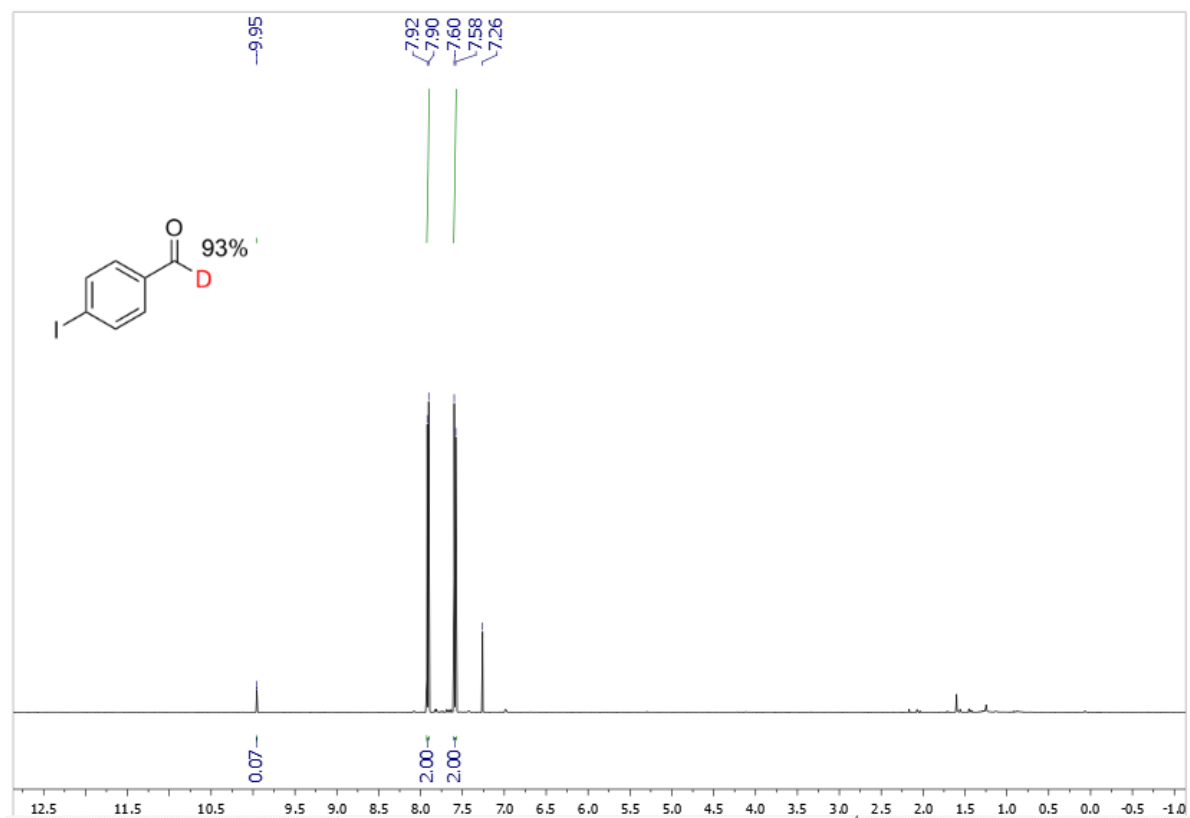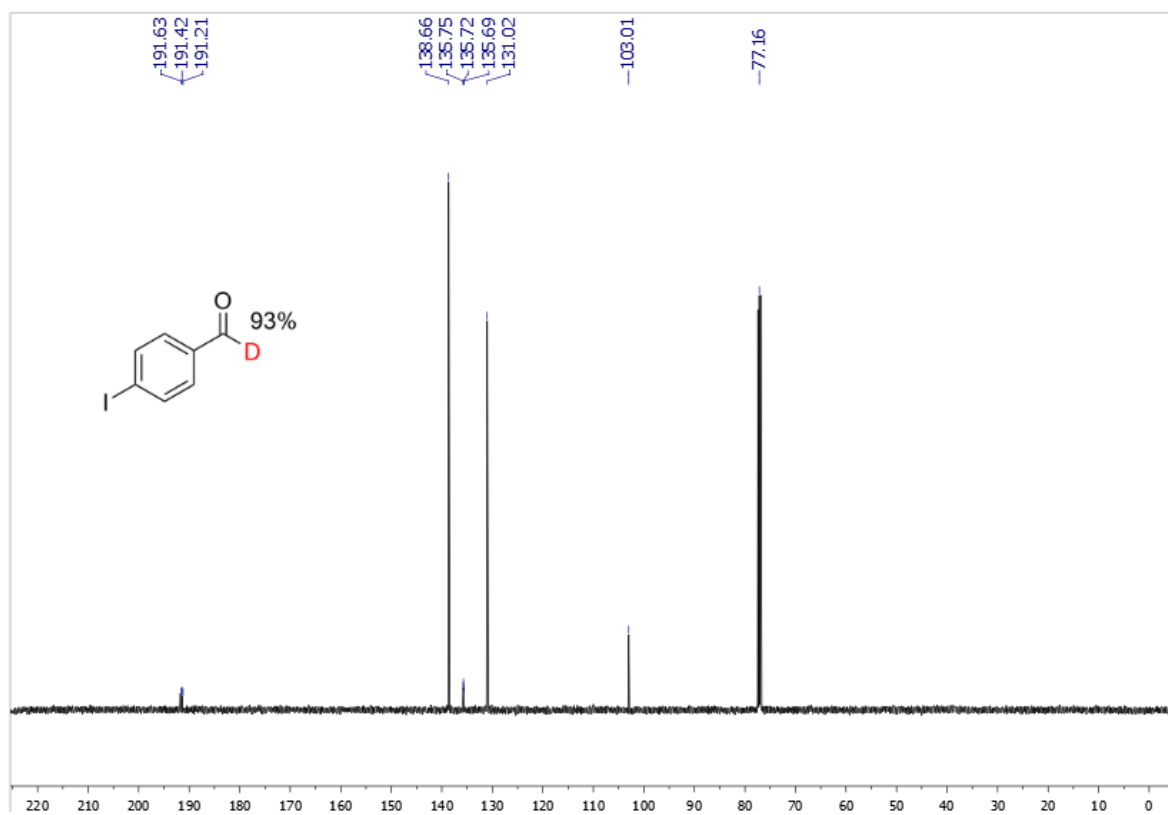

4-Hydroxybenzaldehyde-*formyl-d1* (3J)

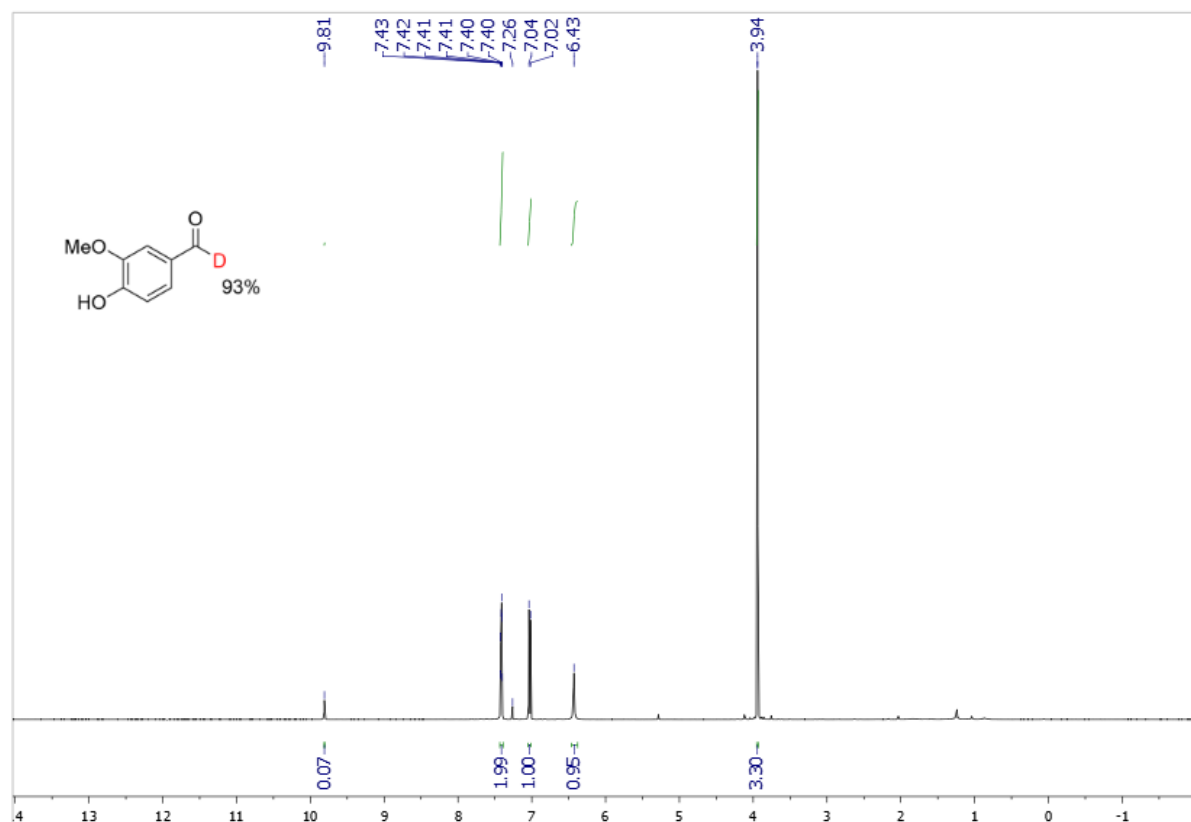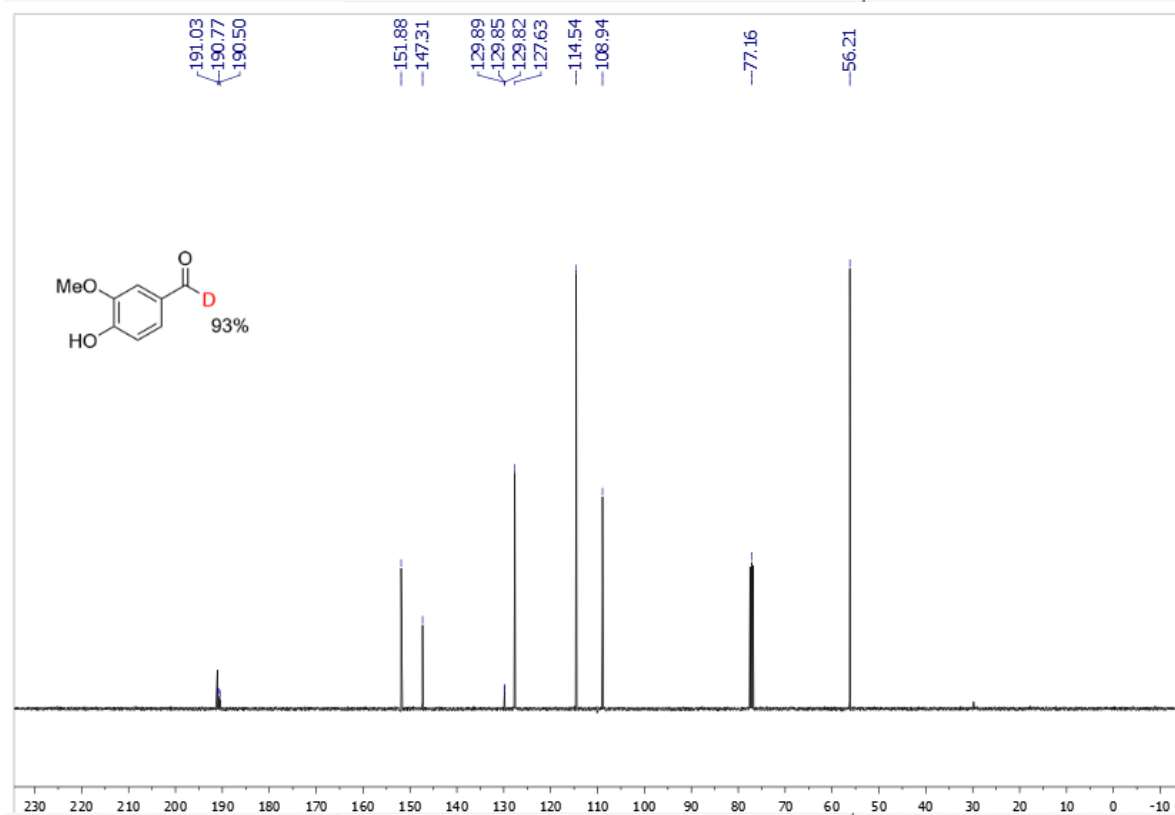

4-Hydroxy-3-methoxybenzaldehyde-*formyl-d1* (3k)

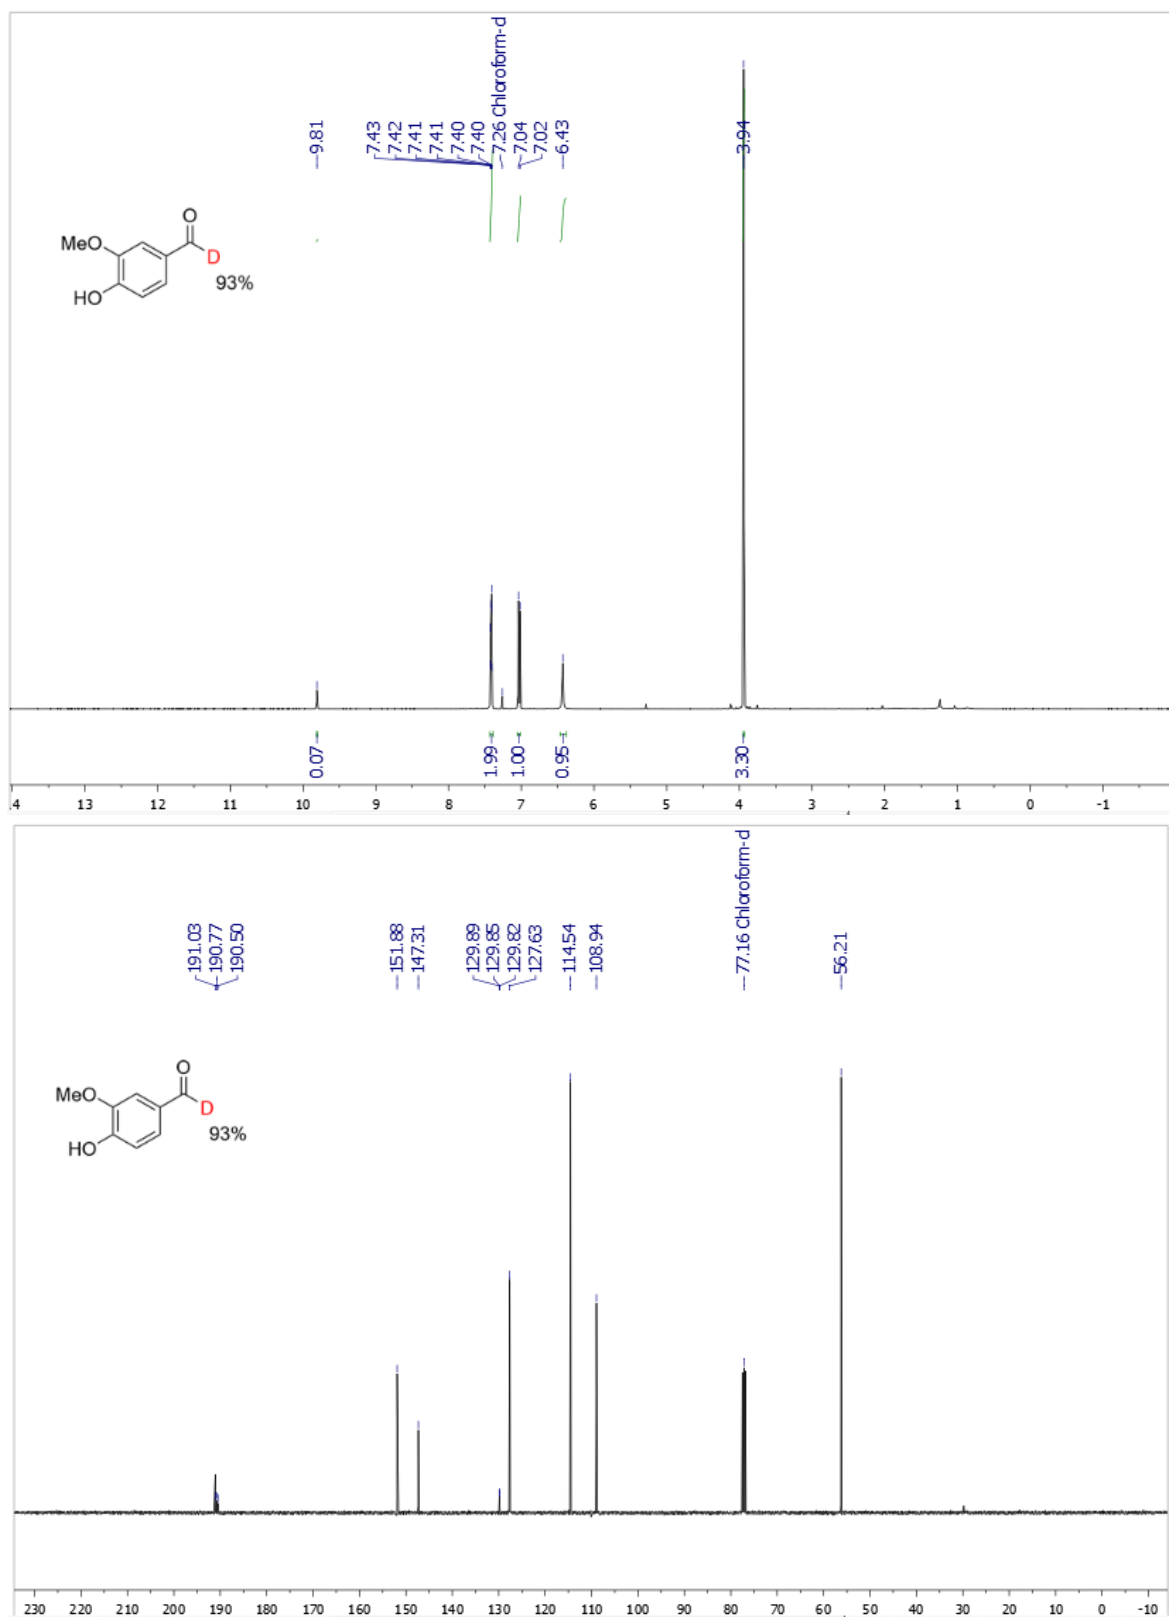

**4-Formylphenyl acetate-*formyl-d1* (3I)**

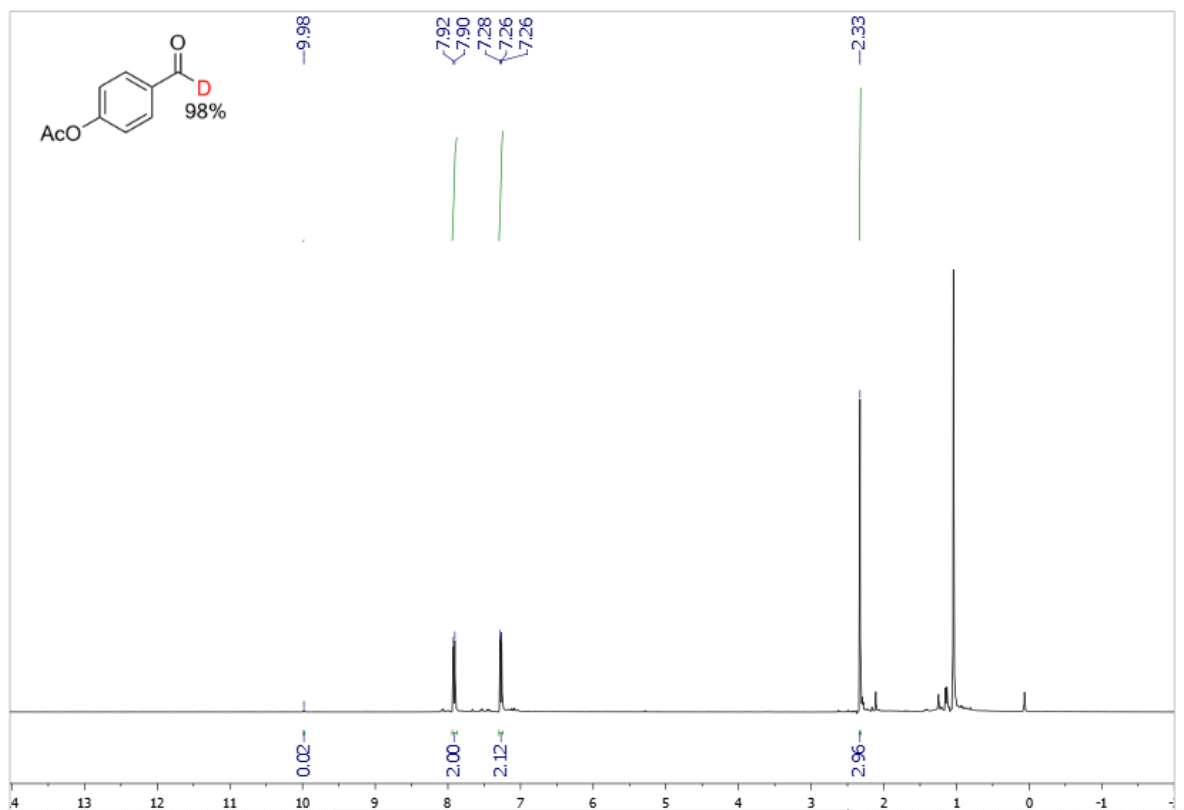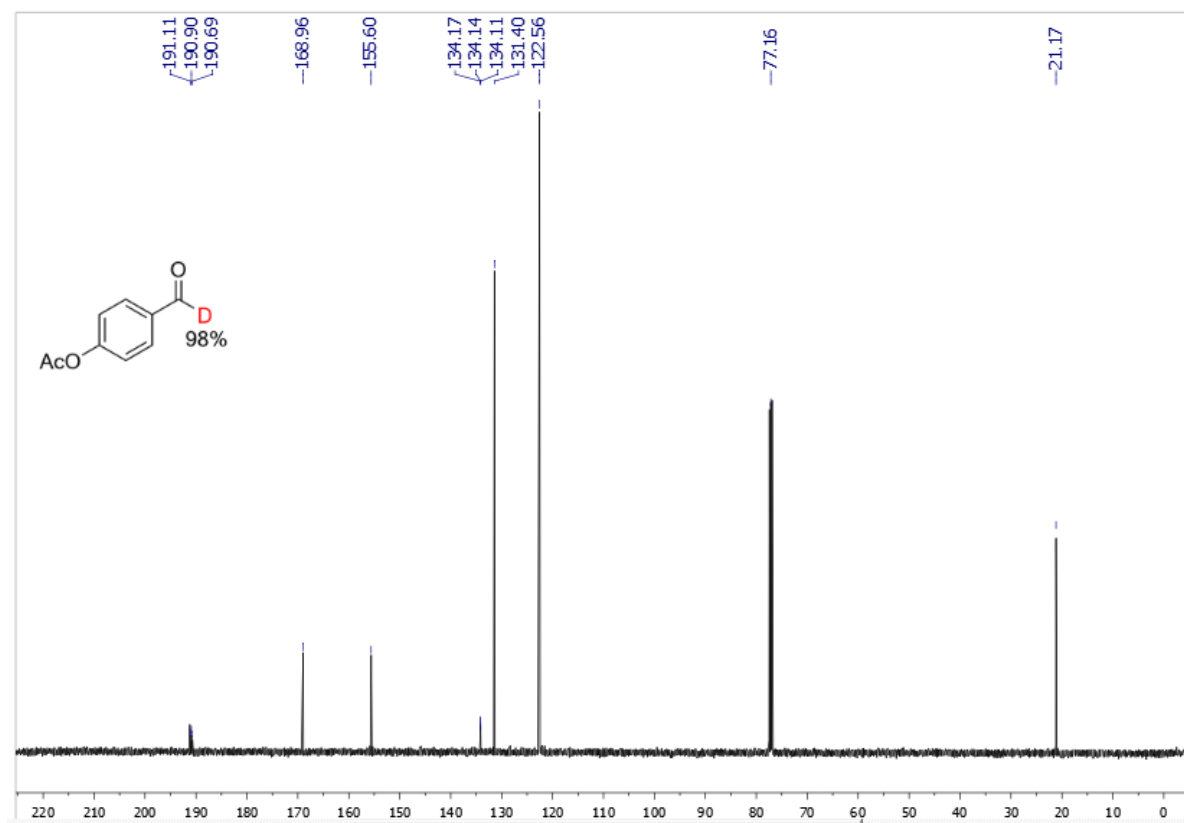

4-(Allyloxy)benzaldehyde-*formyl-d1* (3m)

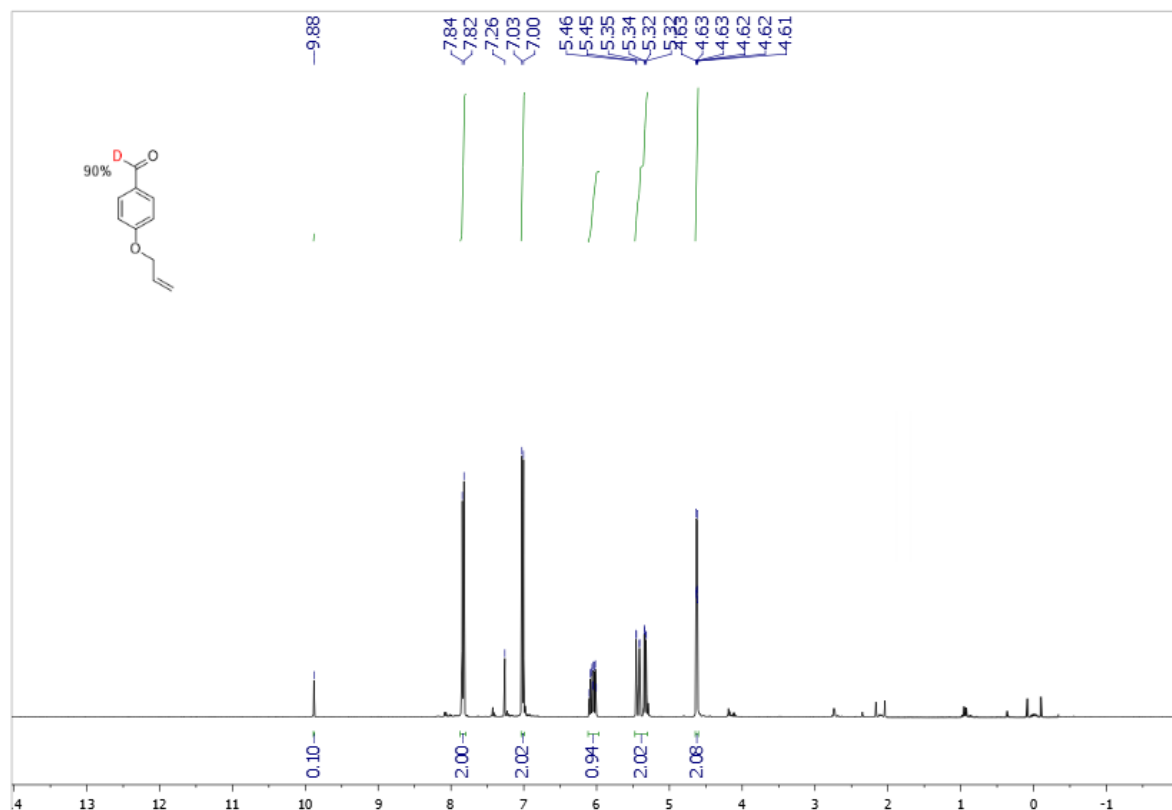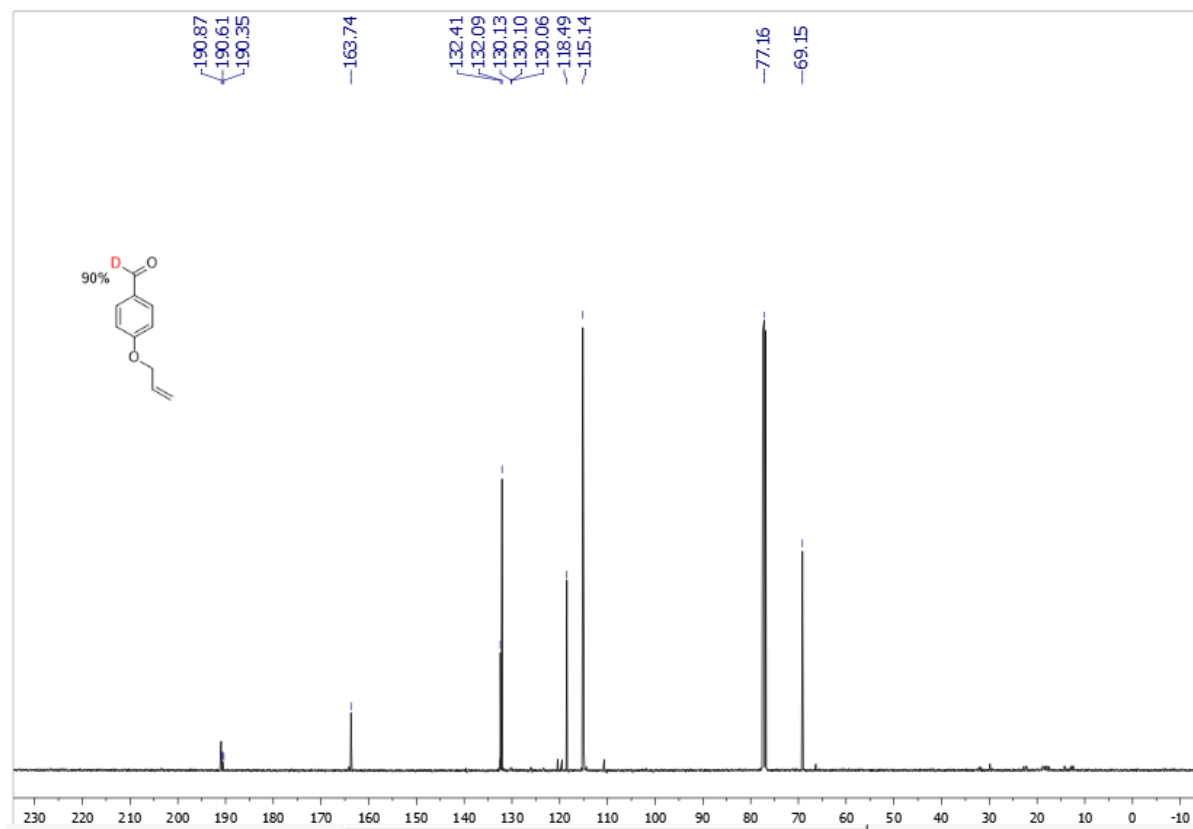



***N*-(4-Formylphenyl)acetamide-*formyl-d1* (3n)**

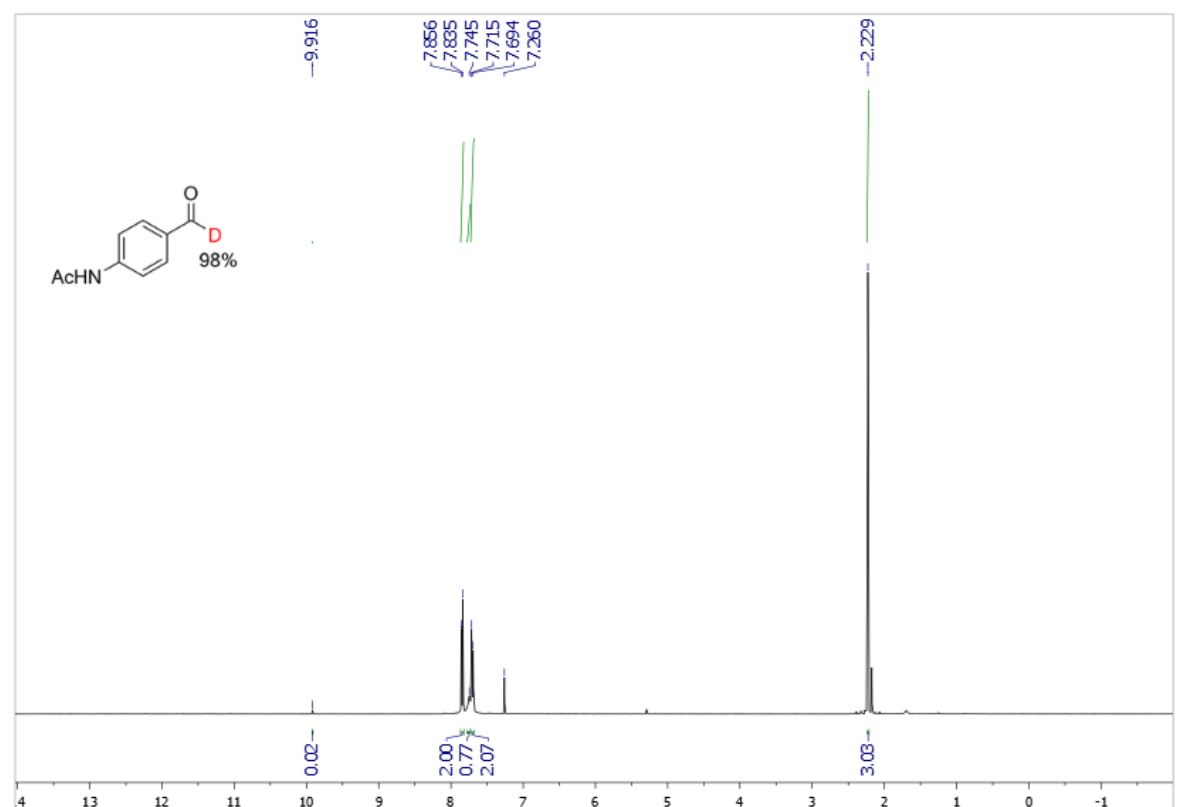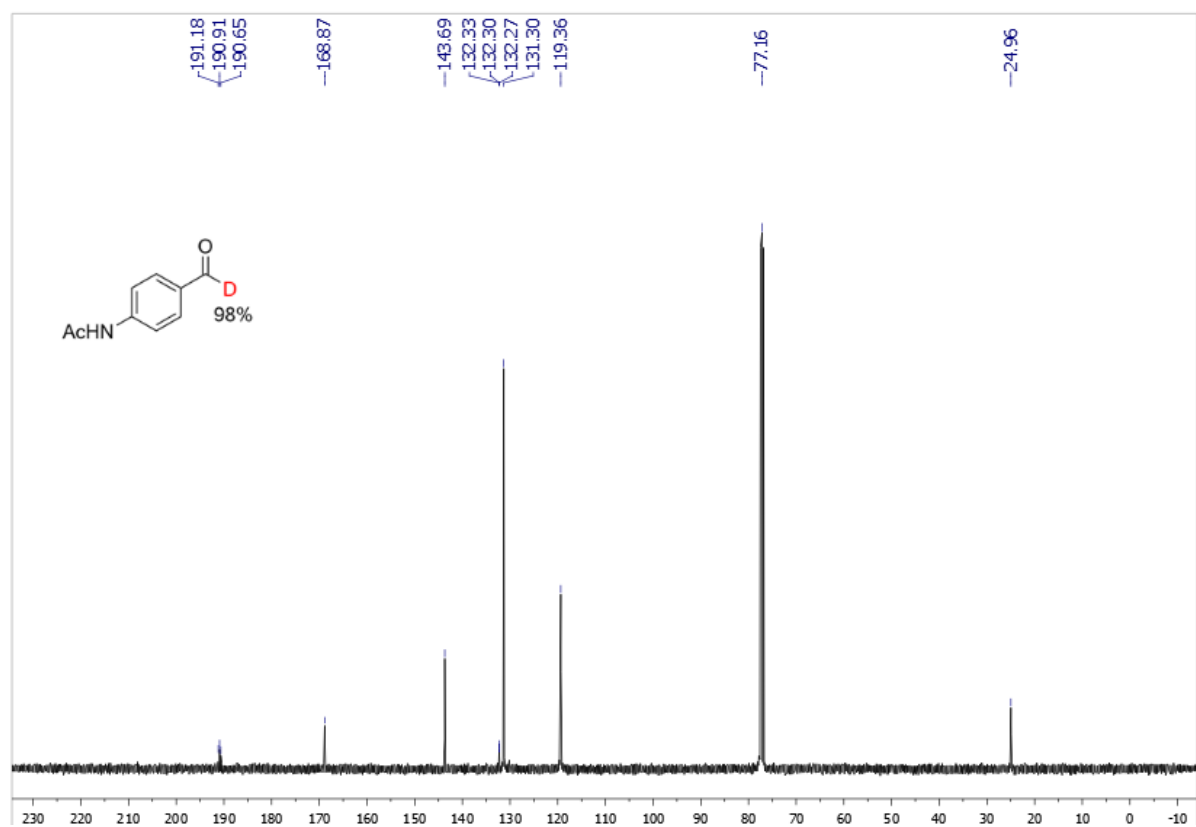

**4-Morpholinobenzaldehyde-*formyl-d*1 (3o)**

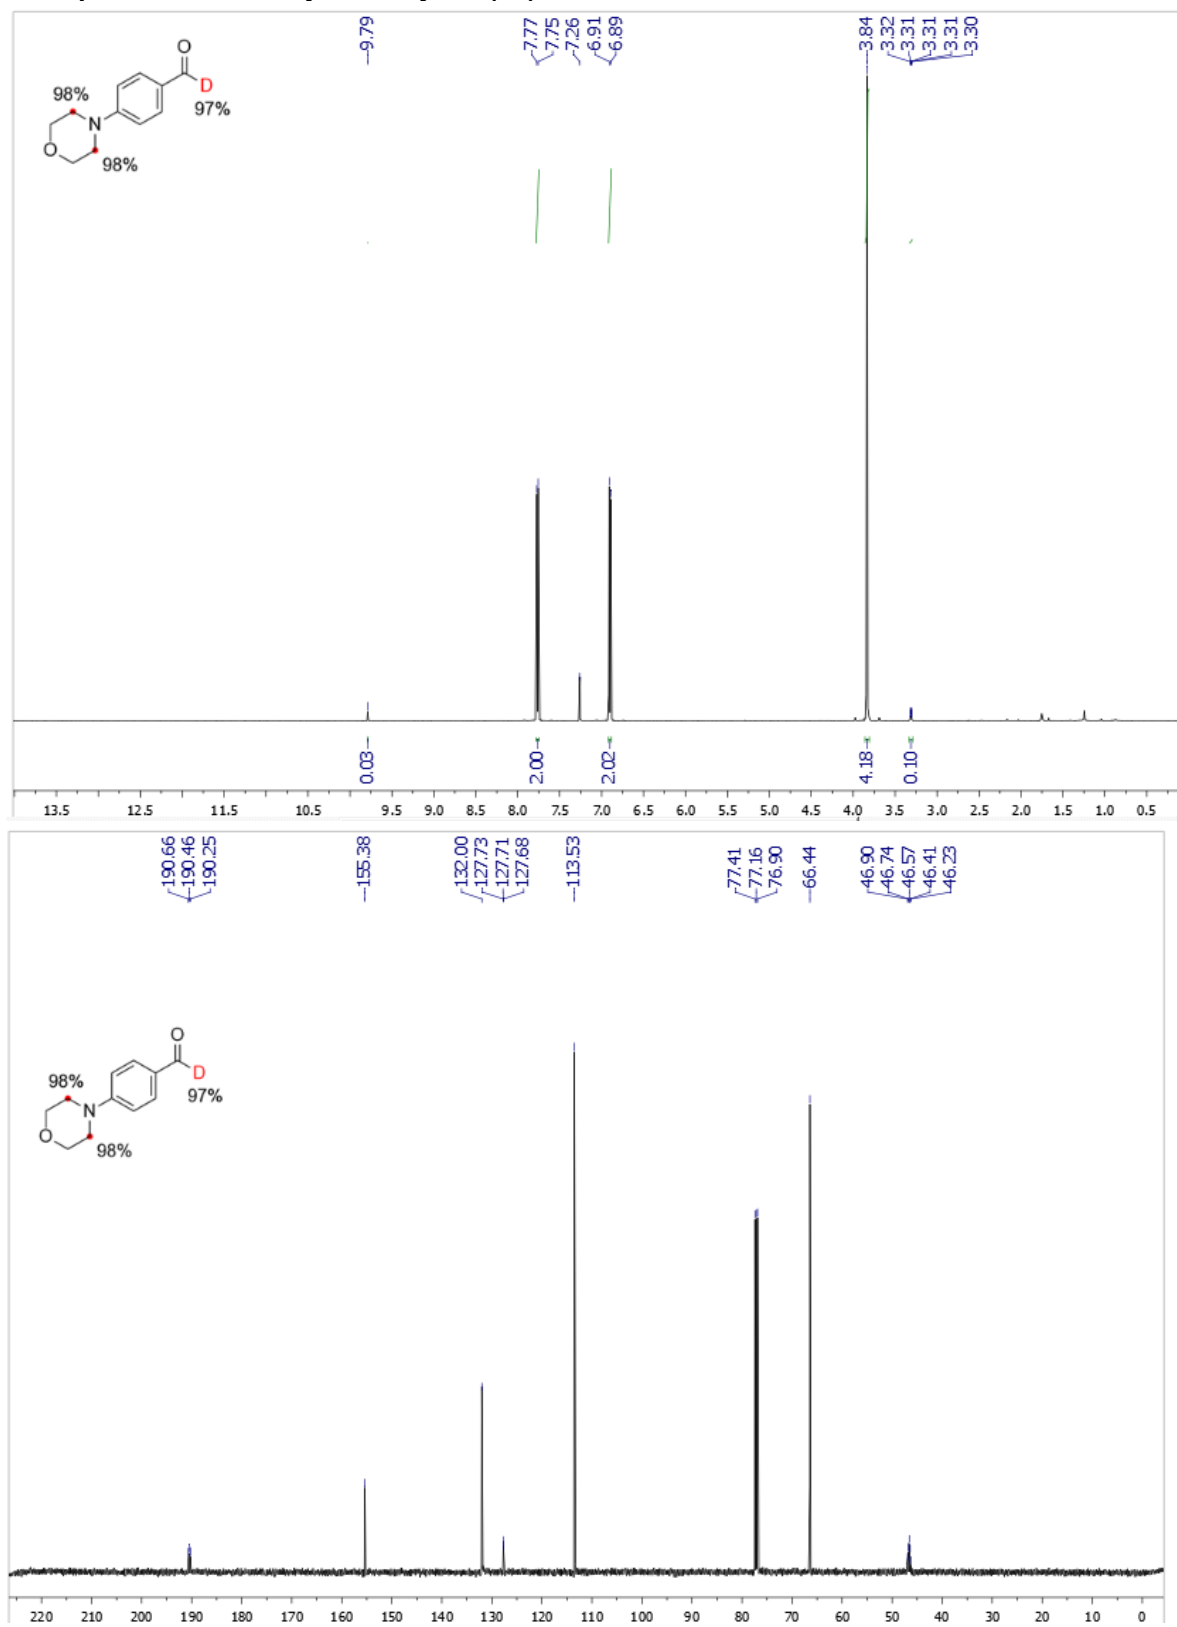

**1H-indole-3-carbaldehyde-formyl-d1 (3p)**

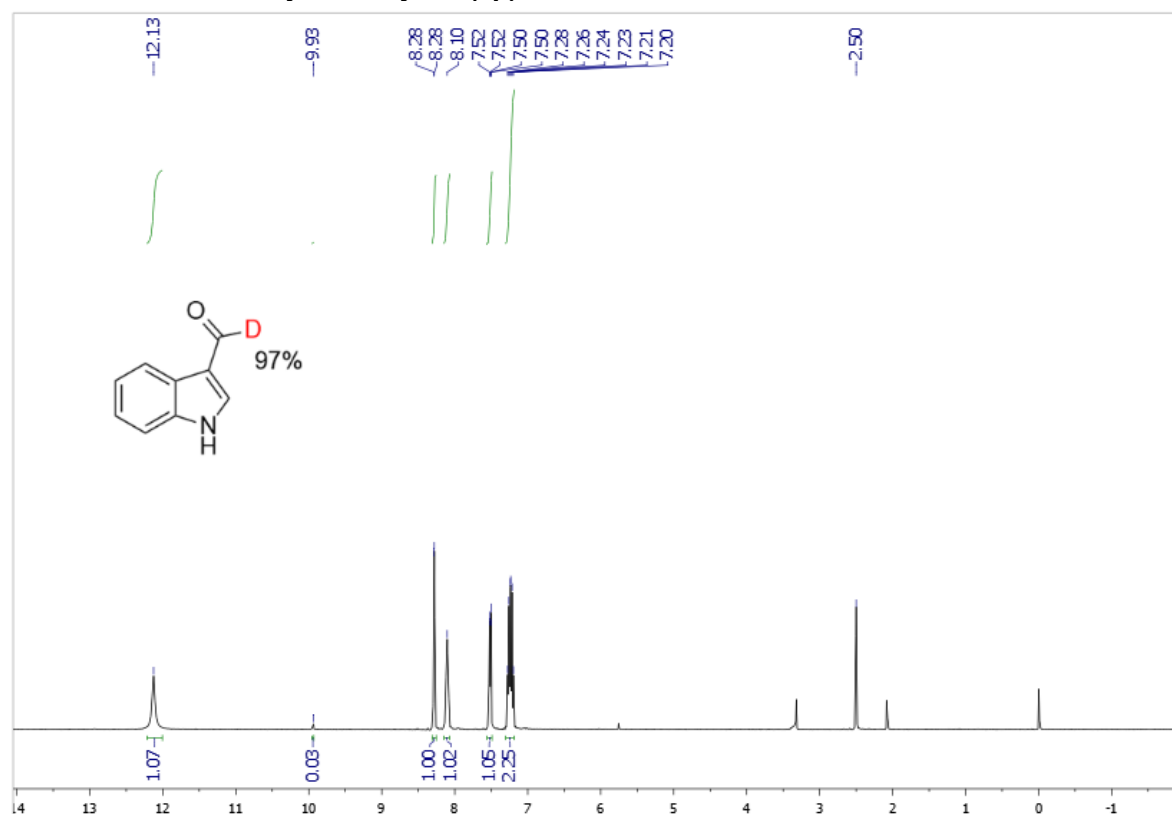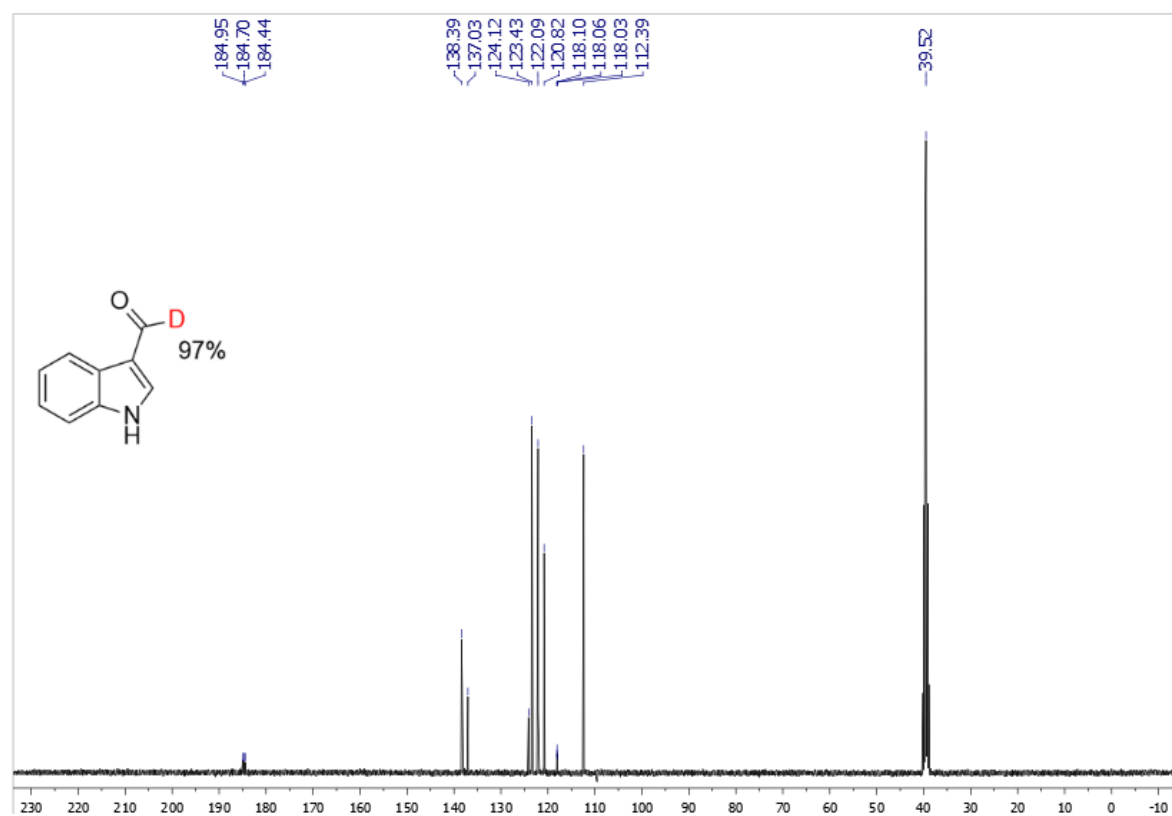

**1H-indole-6-carbaldehyde-formyl-d1 (3q)**

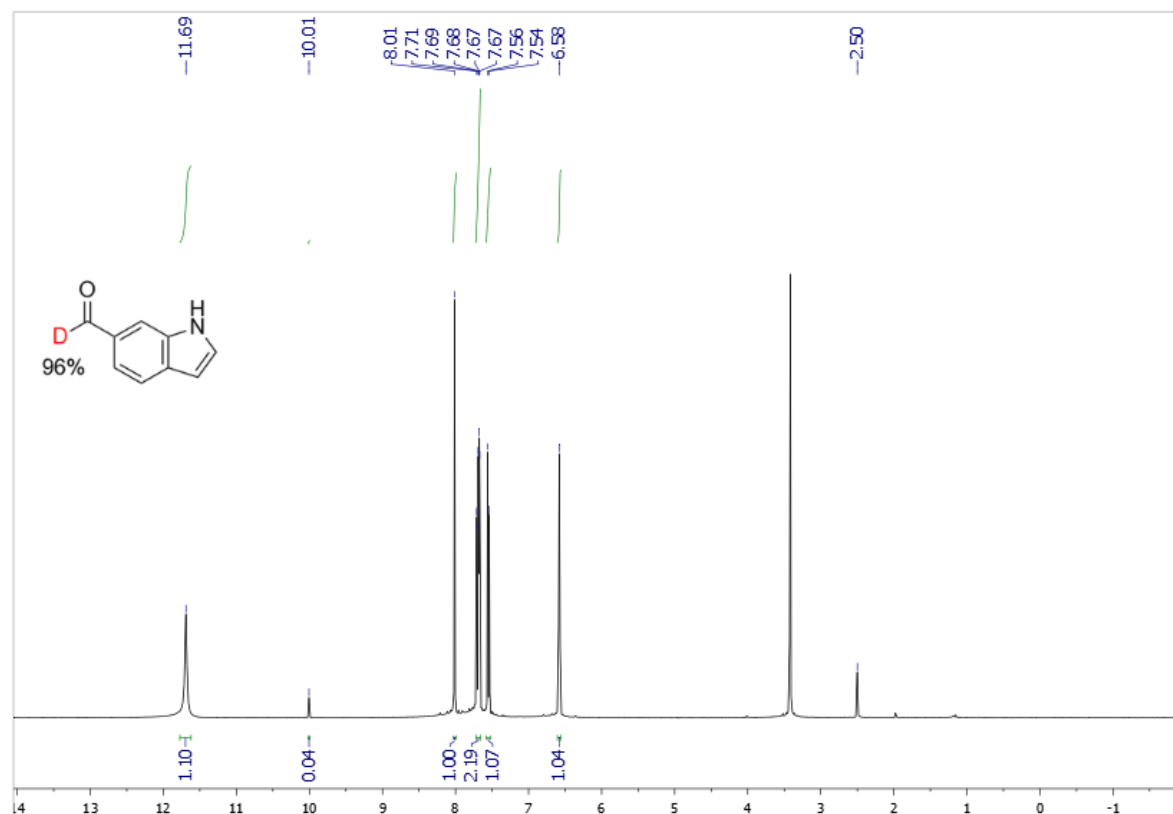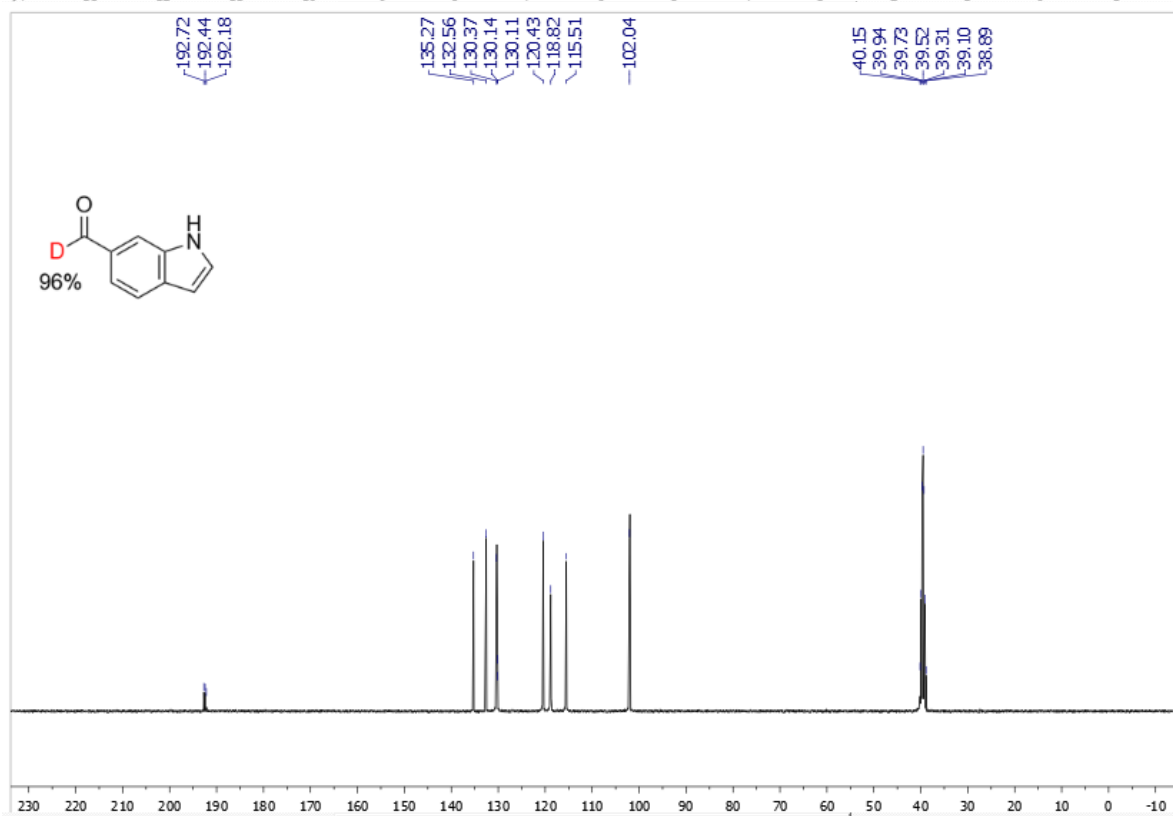

**Benzo[b]thiophene-3-carbaldehyde-*formyl-d1* (3r)**

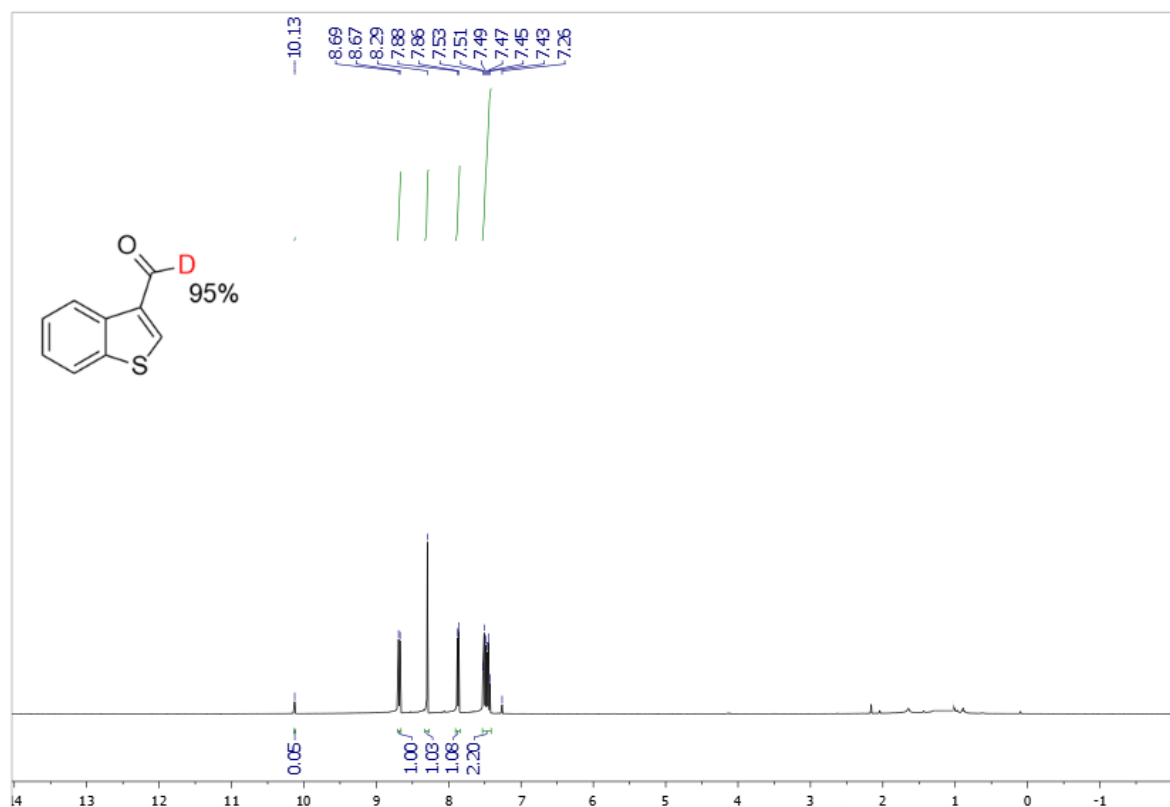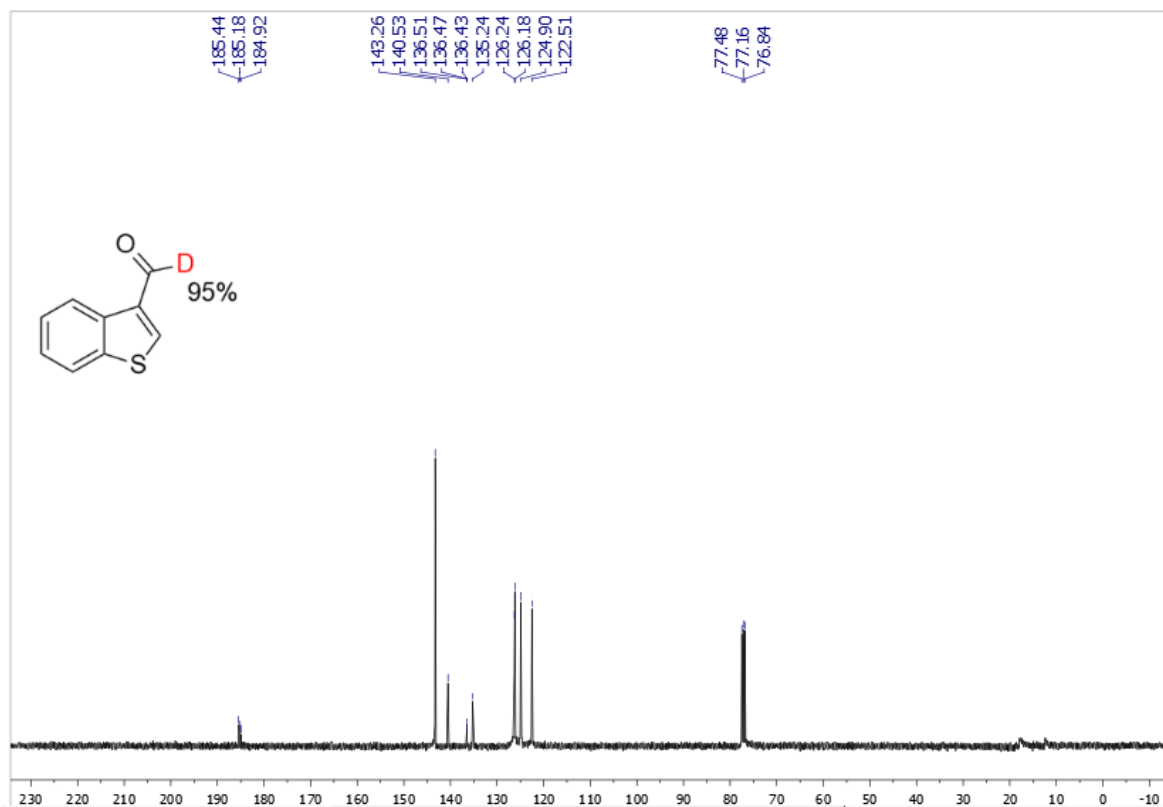

**1-(*tert*-Butyl) 2-(4-formylphenyl) (*S*)-pyrrolidine-1,2-dicarboxylate-*formyl-d1* (3s)**

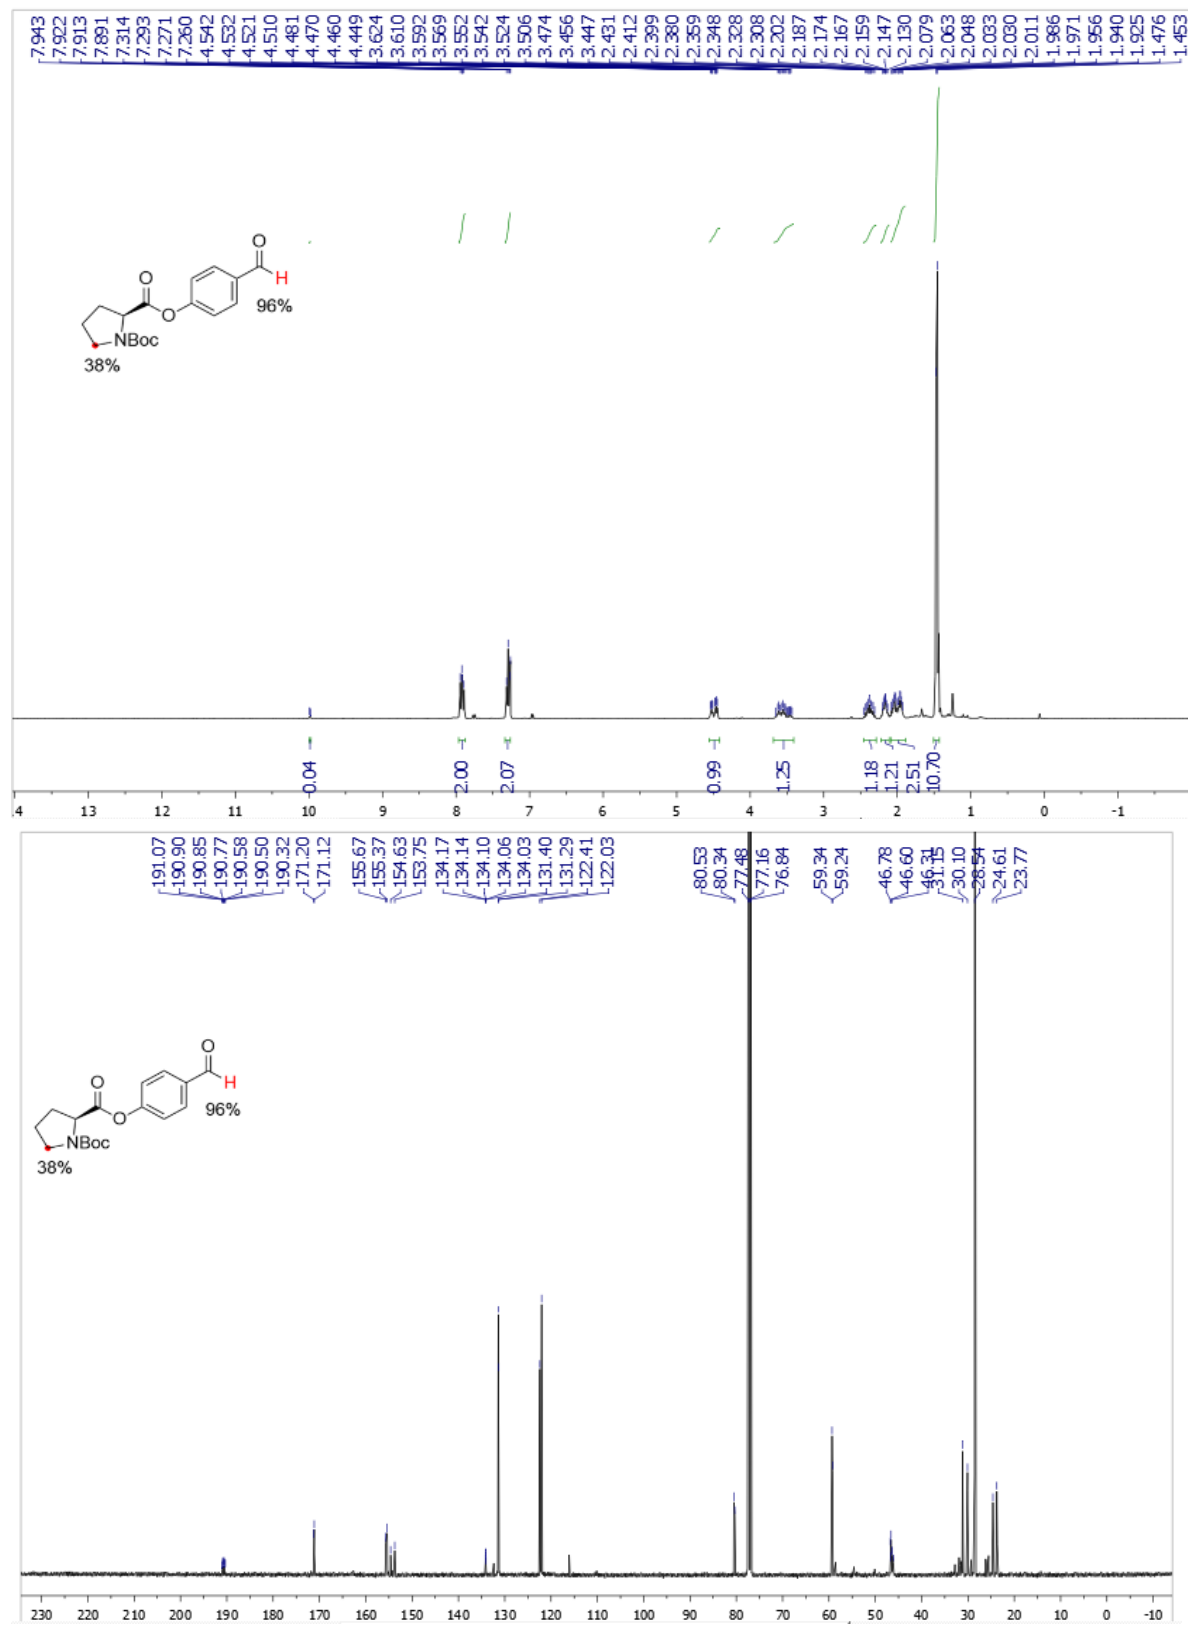

### 3-Phenylpropanal-formyl-d1 (3t)

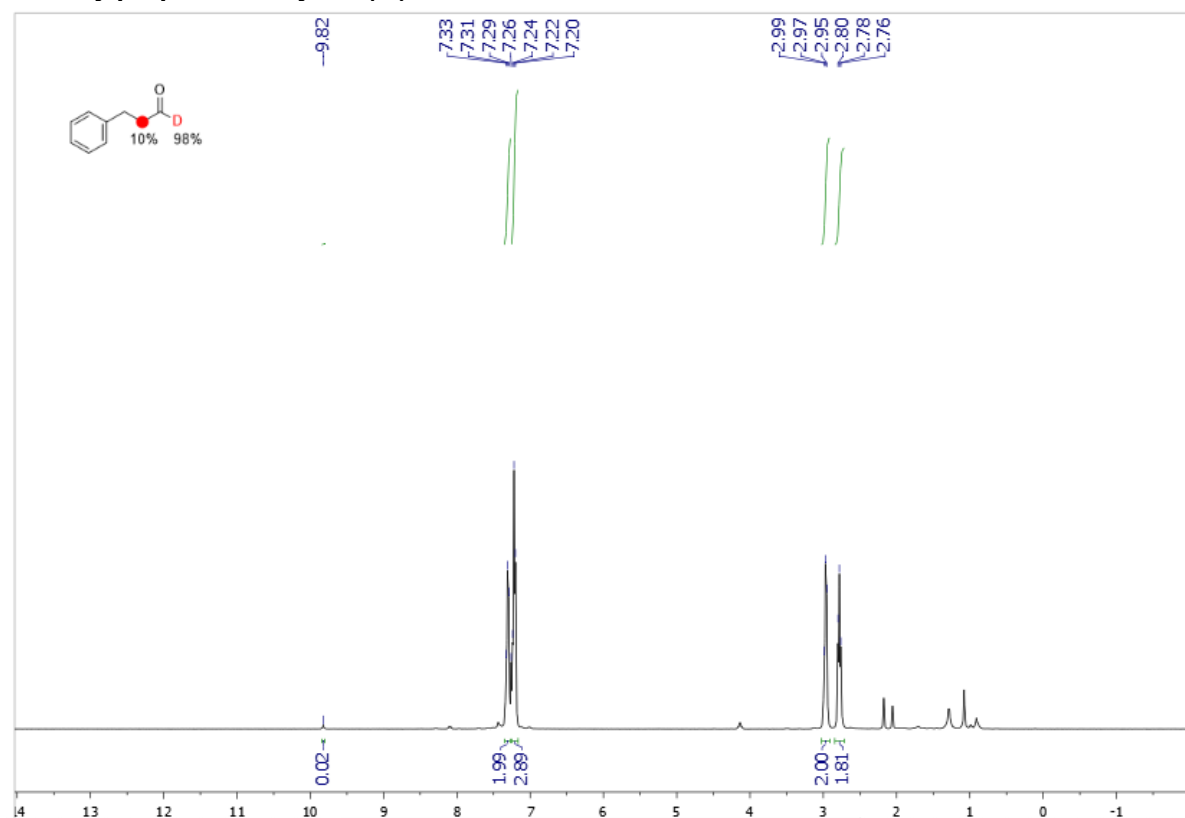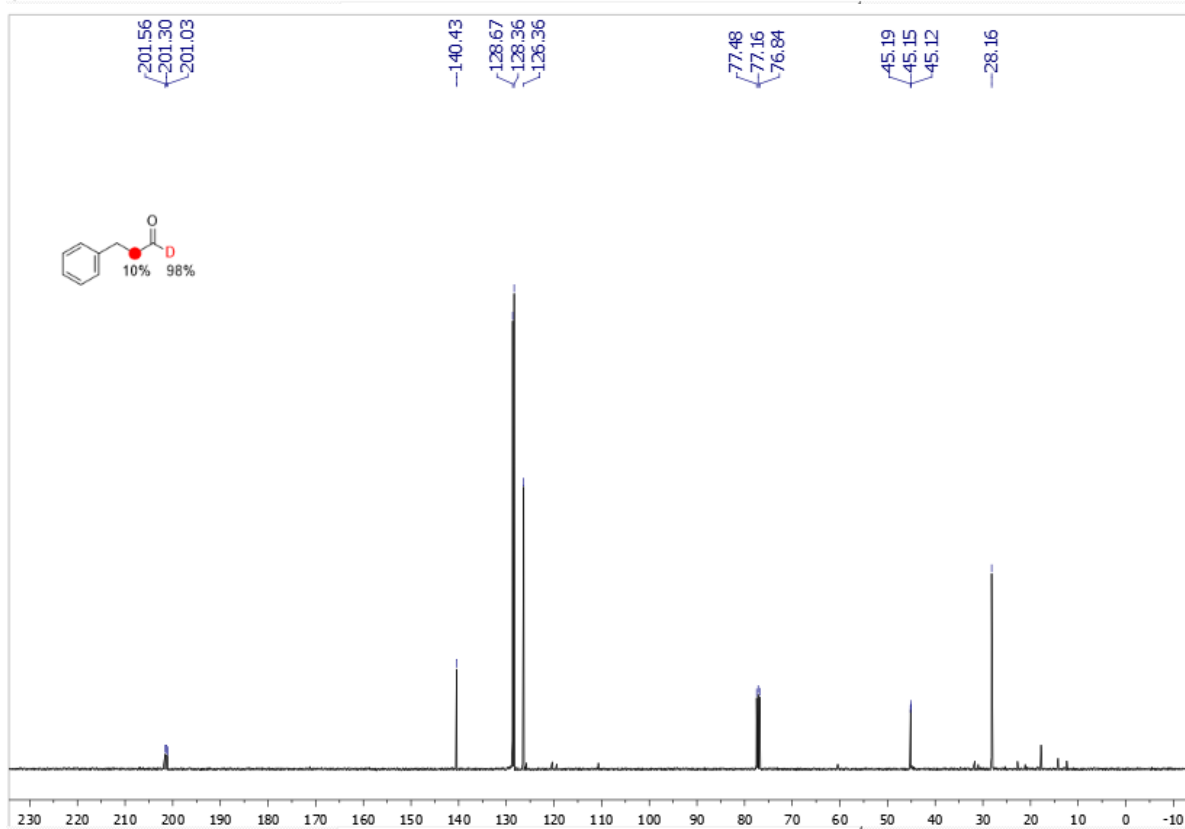

**3-(2-Chlorophenyl)propanal-*formyl-d1* (3u)**

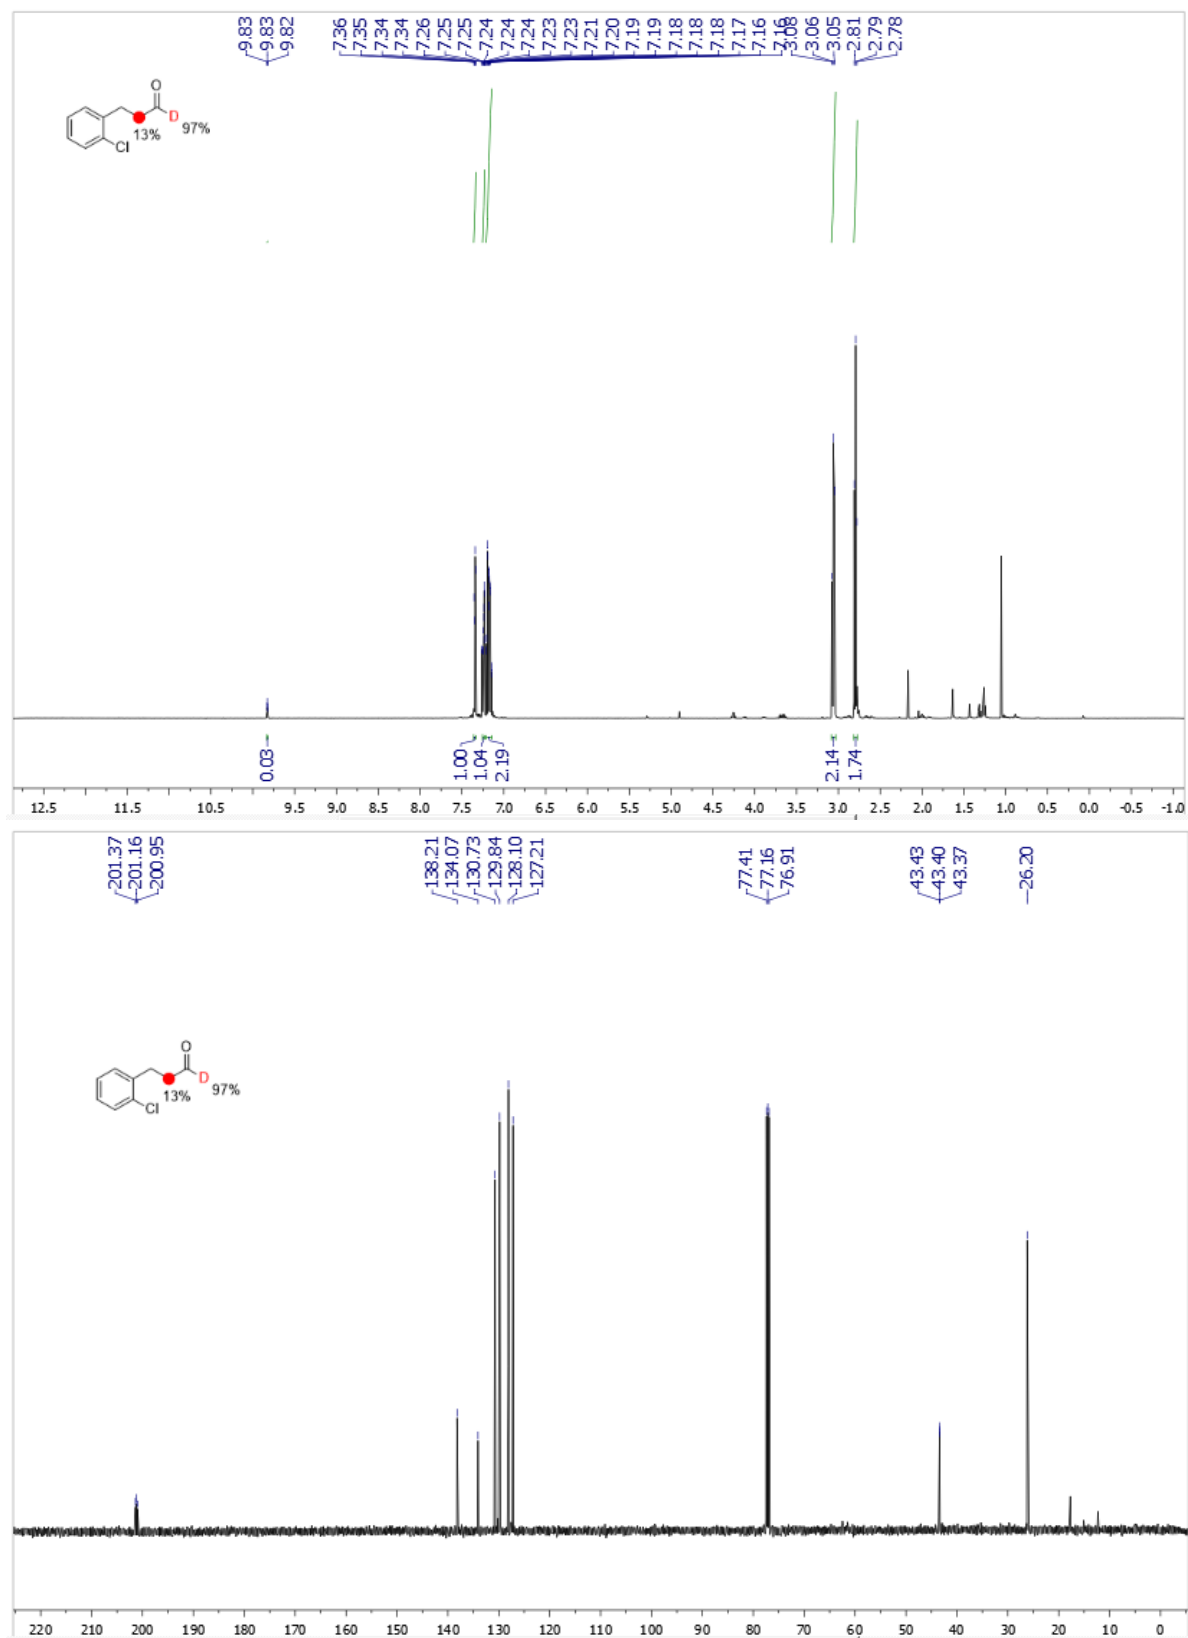



**3-(Benzo[d][1,3]dioxol-5-yl)propanal-formyl-d1 (3v)**

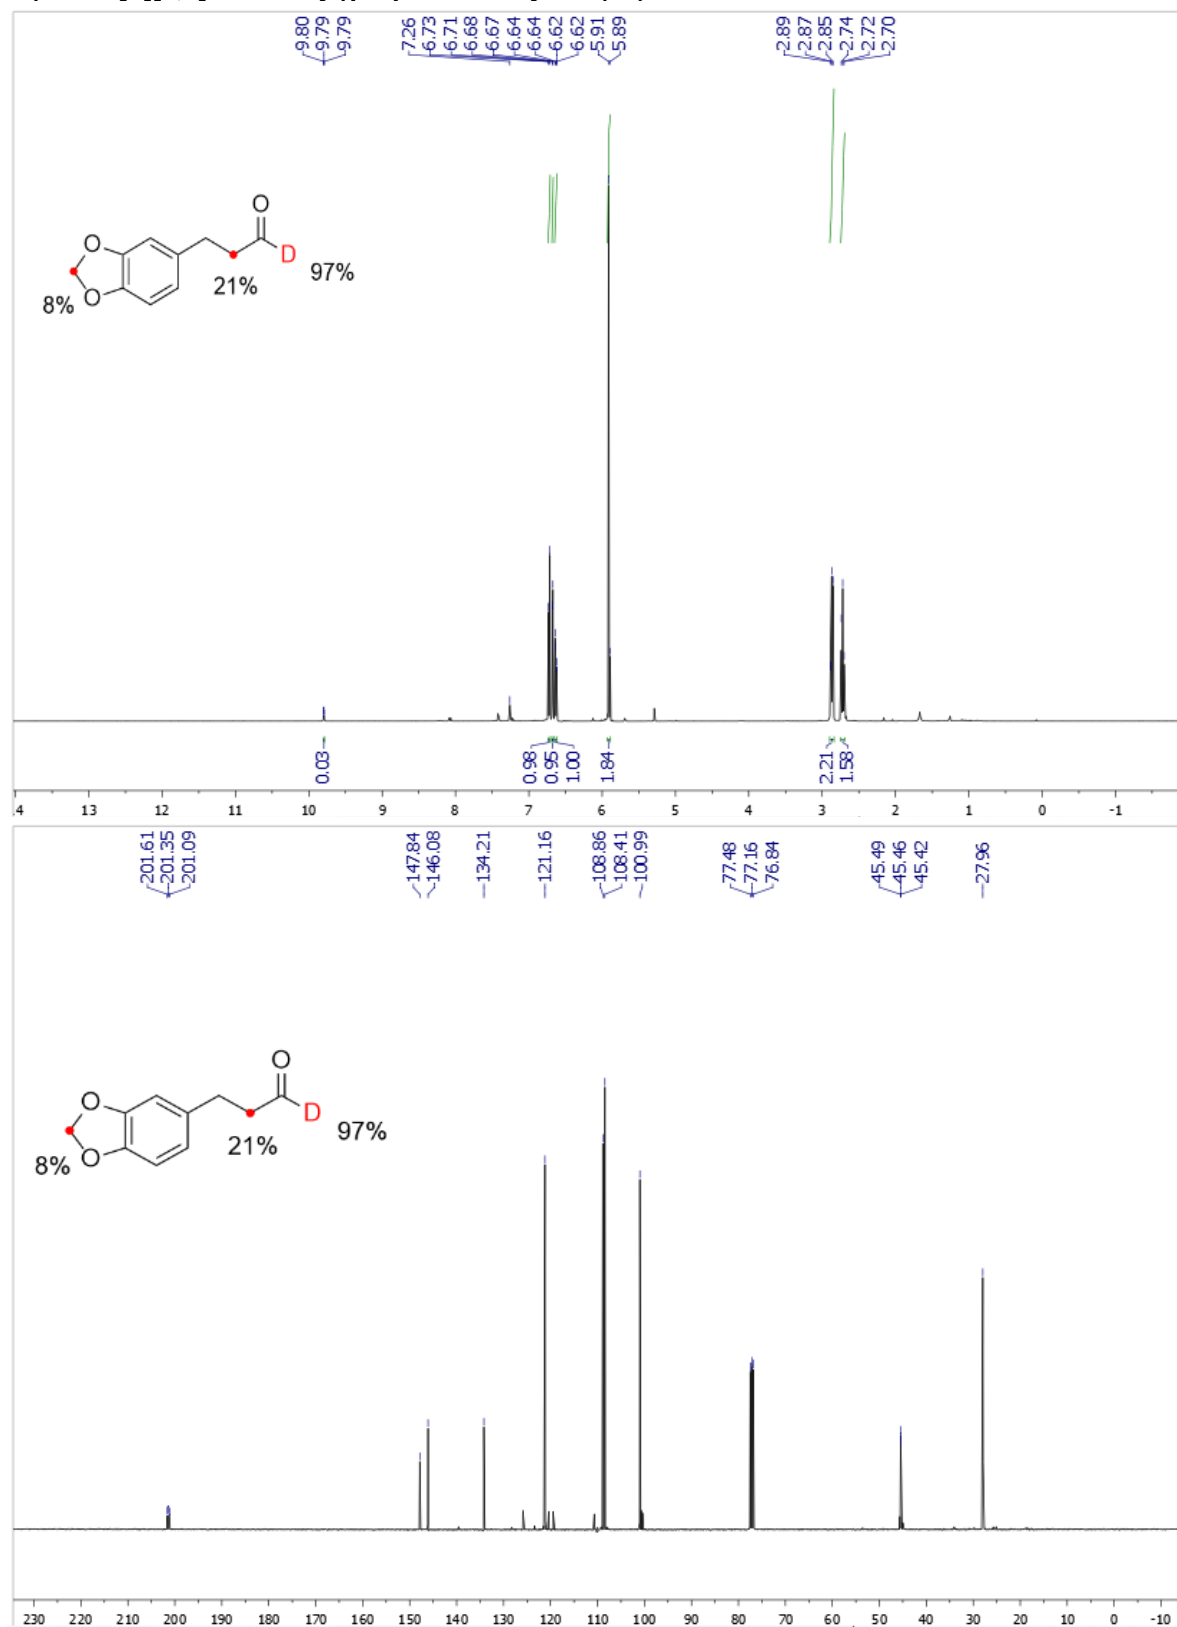

**3-((*tert*-Butyldimethylsilyl)oxy)propanal-*formyl-d1* (3w)**

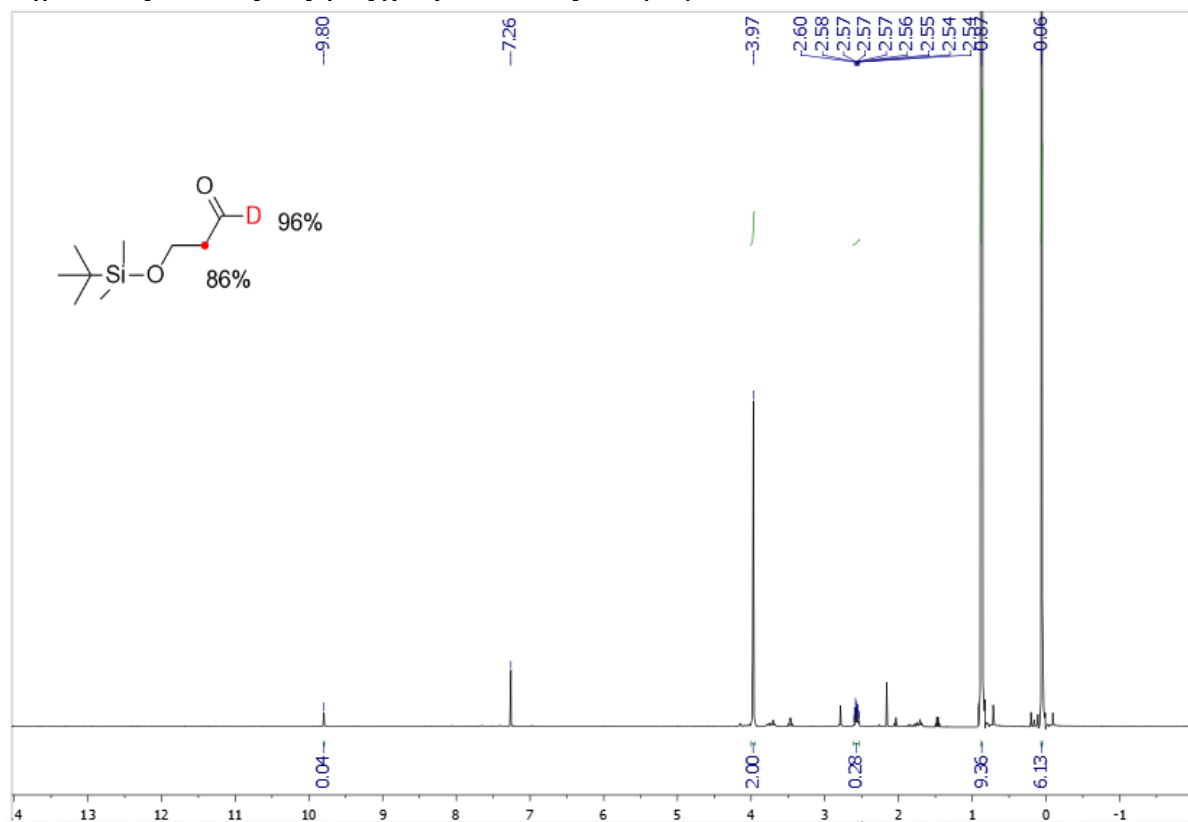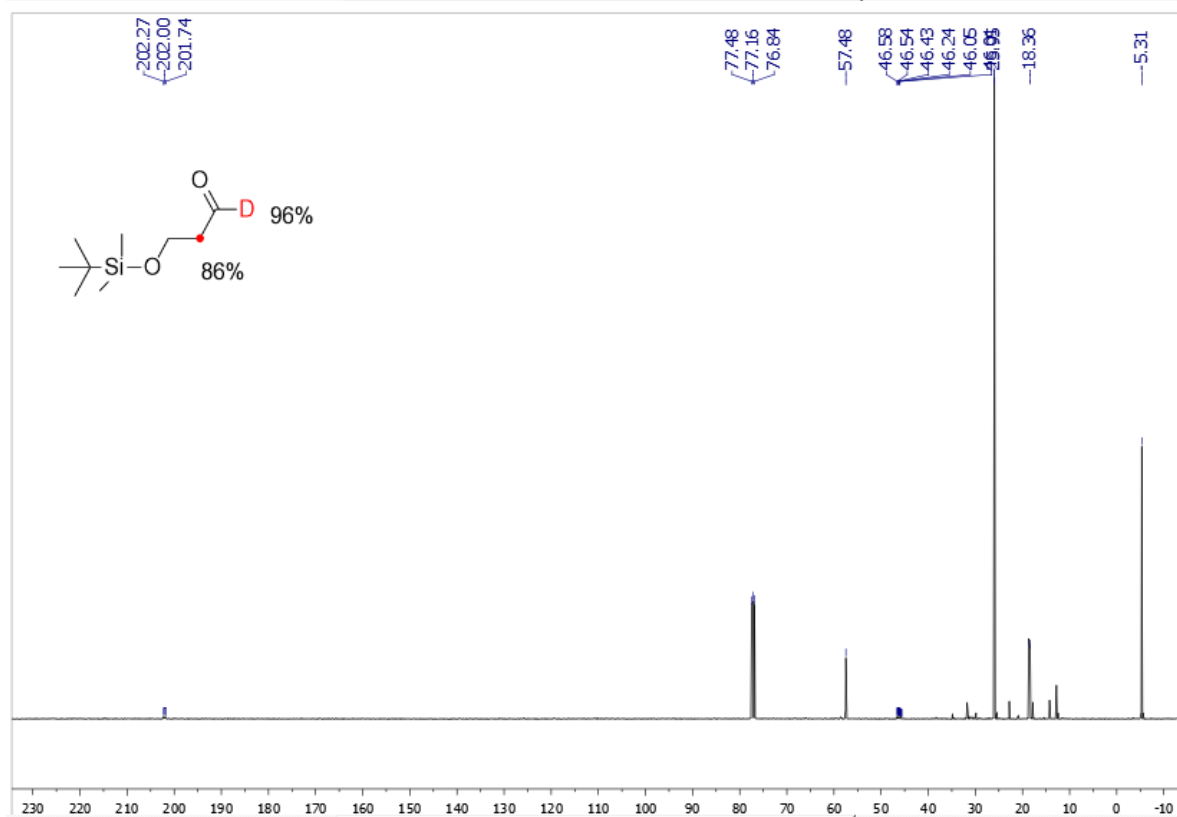

**3-(4-(*tert*-Butyl)phenyl)-2-methylpropanal-*formyl-d*1 (3x)**

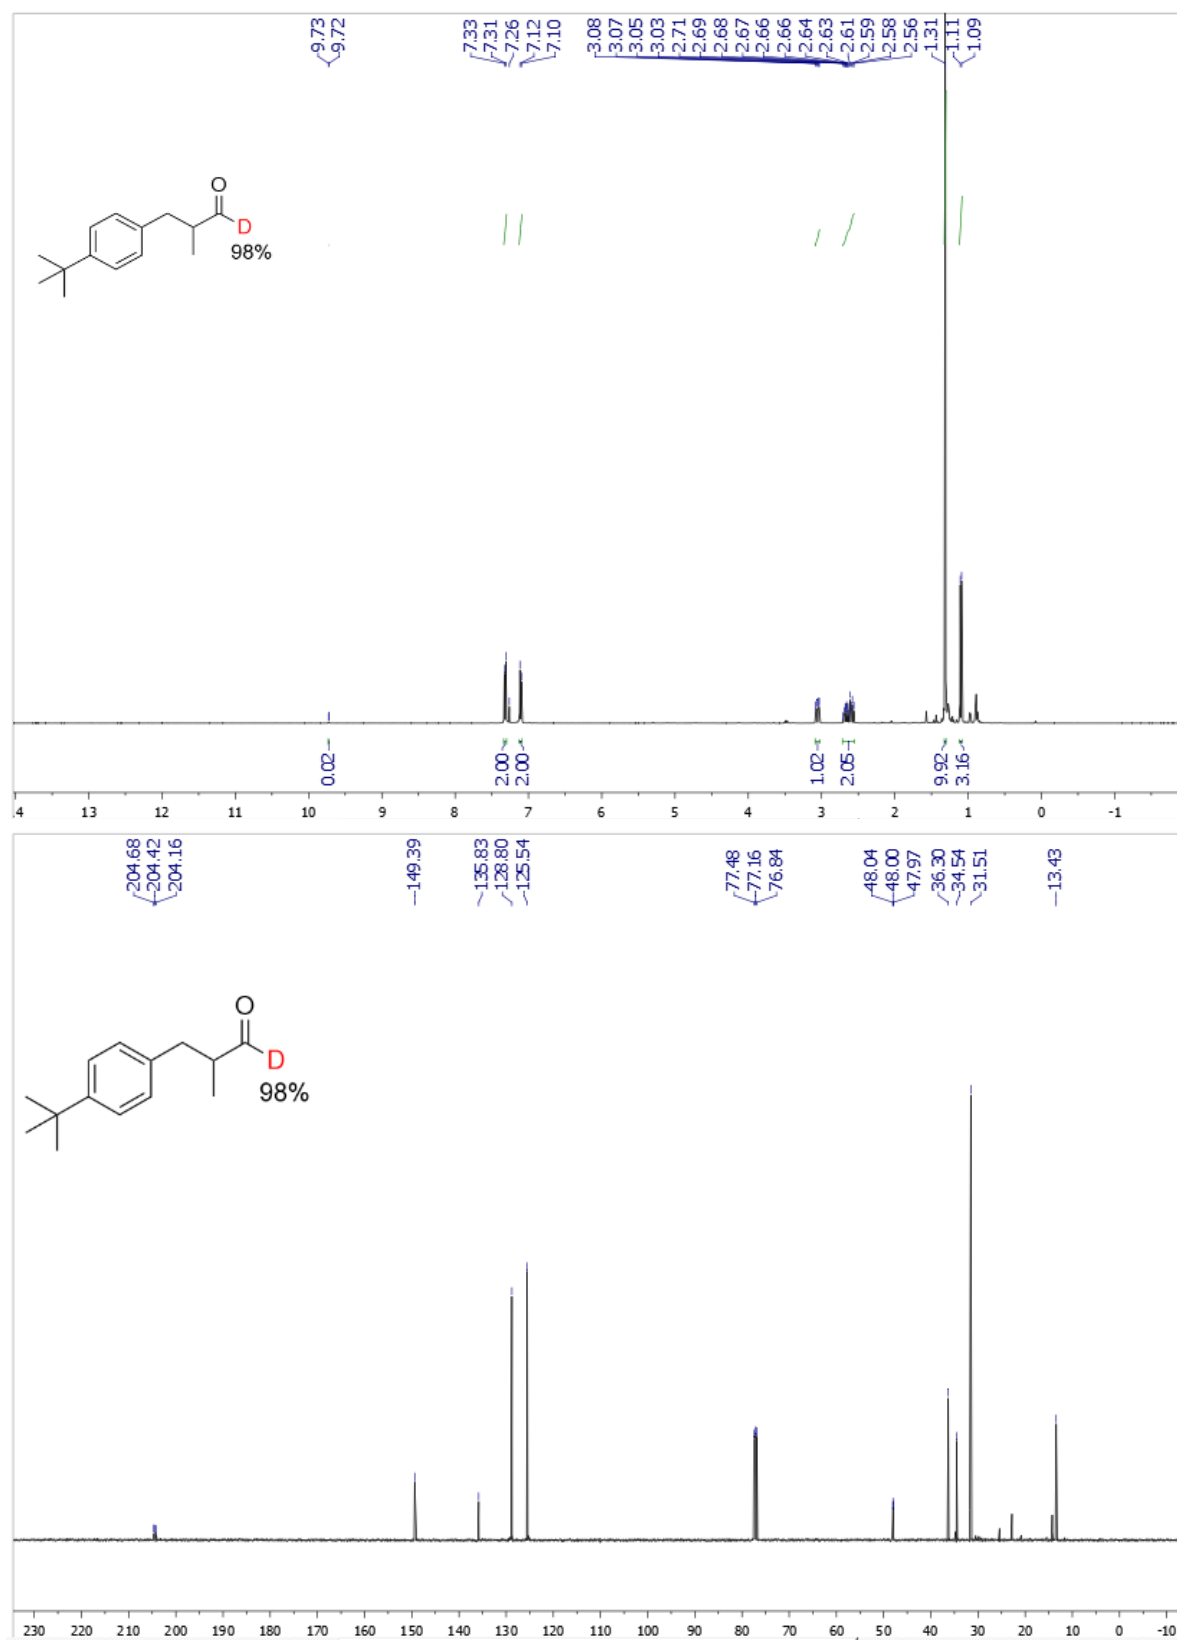

**2,3-Dihydro-1*H*-indene-2-carbaldehyde-*formyl-d*1 (3y)**

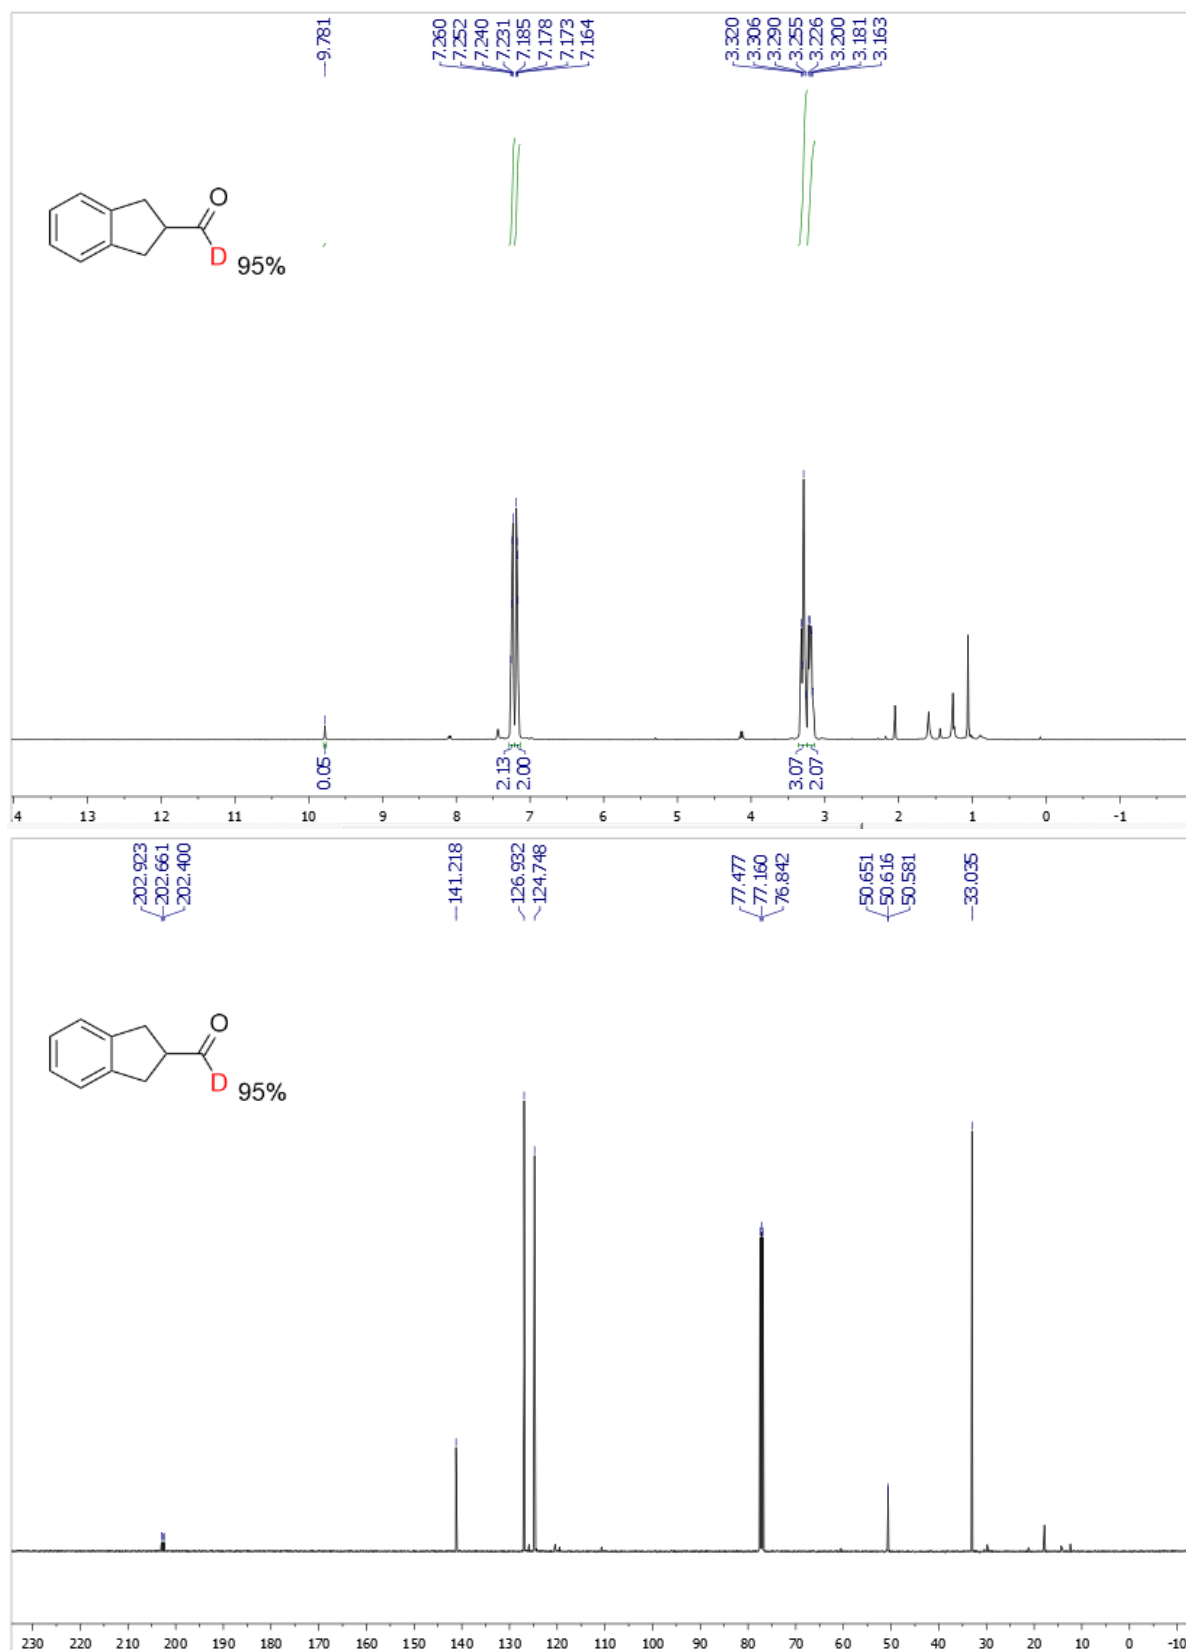

***tert*-Butyl 4-formylpiperidine-1-carboxylate-*formyl-d1* (3z)**

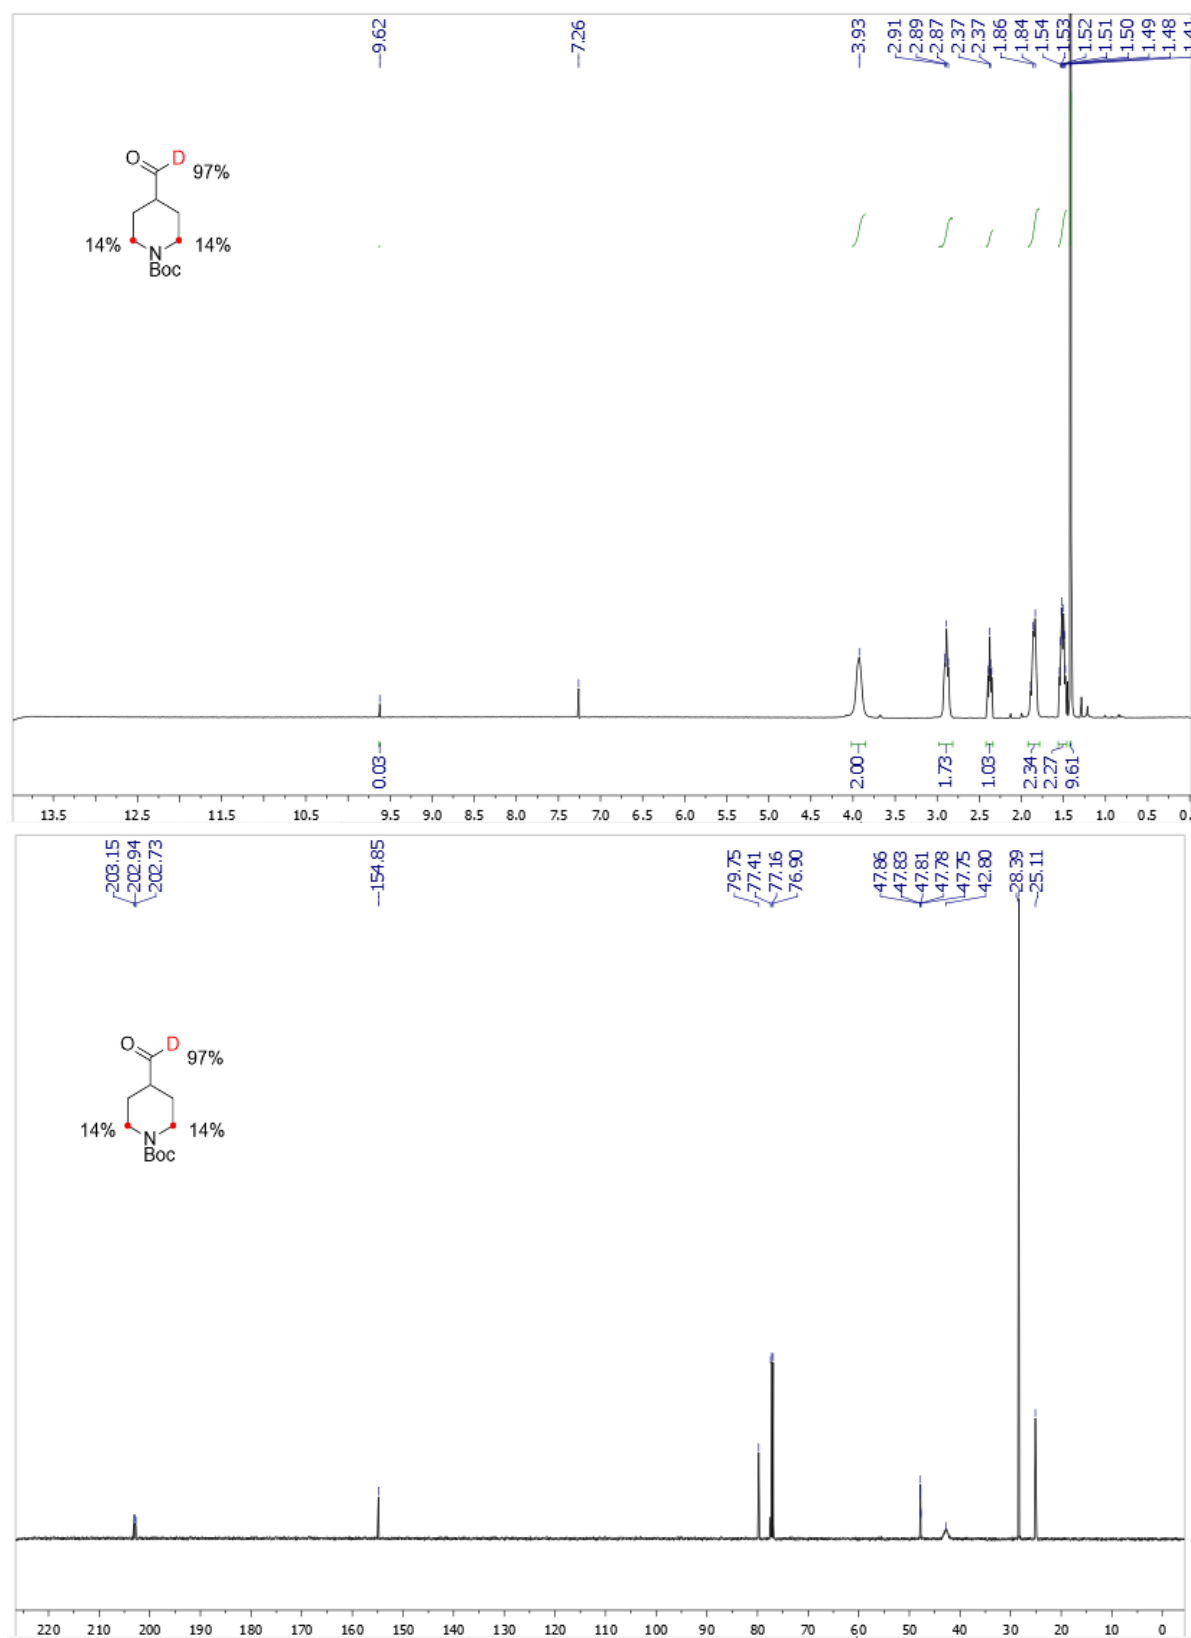

**Bicyclo[2.2.1]hept-5-ene-2-carboxaldehyde-*formyl*-d1 (3aa)**

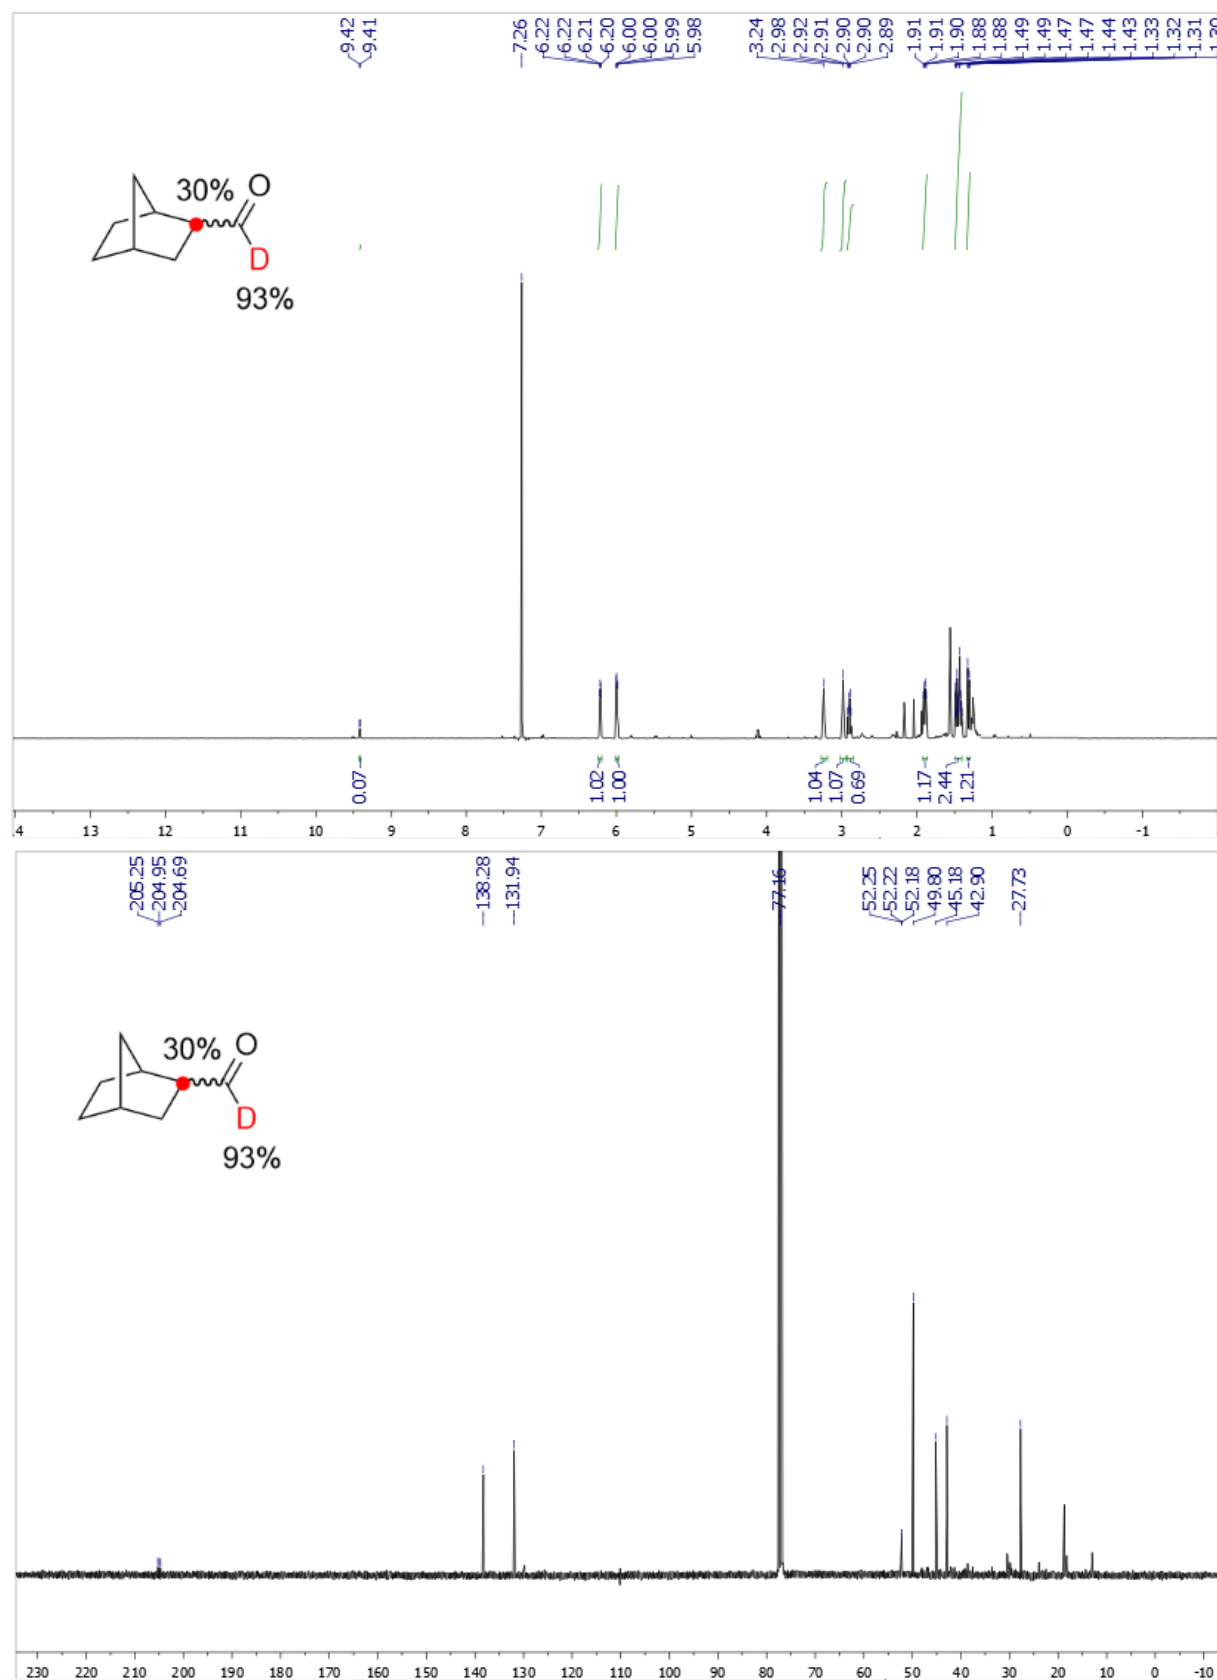

***tert*-Butyl (3-oxopropyl)carbamate-*formyl-d1* (3ab)**

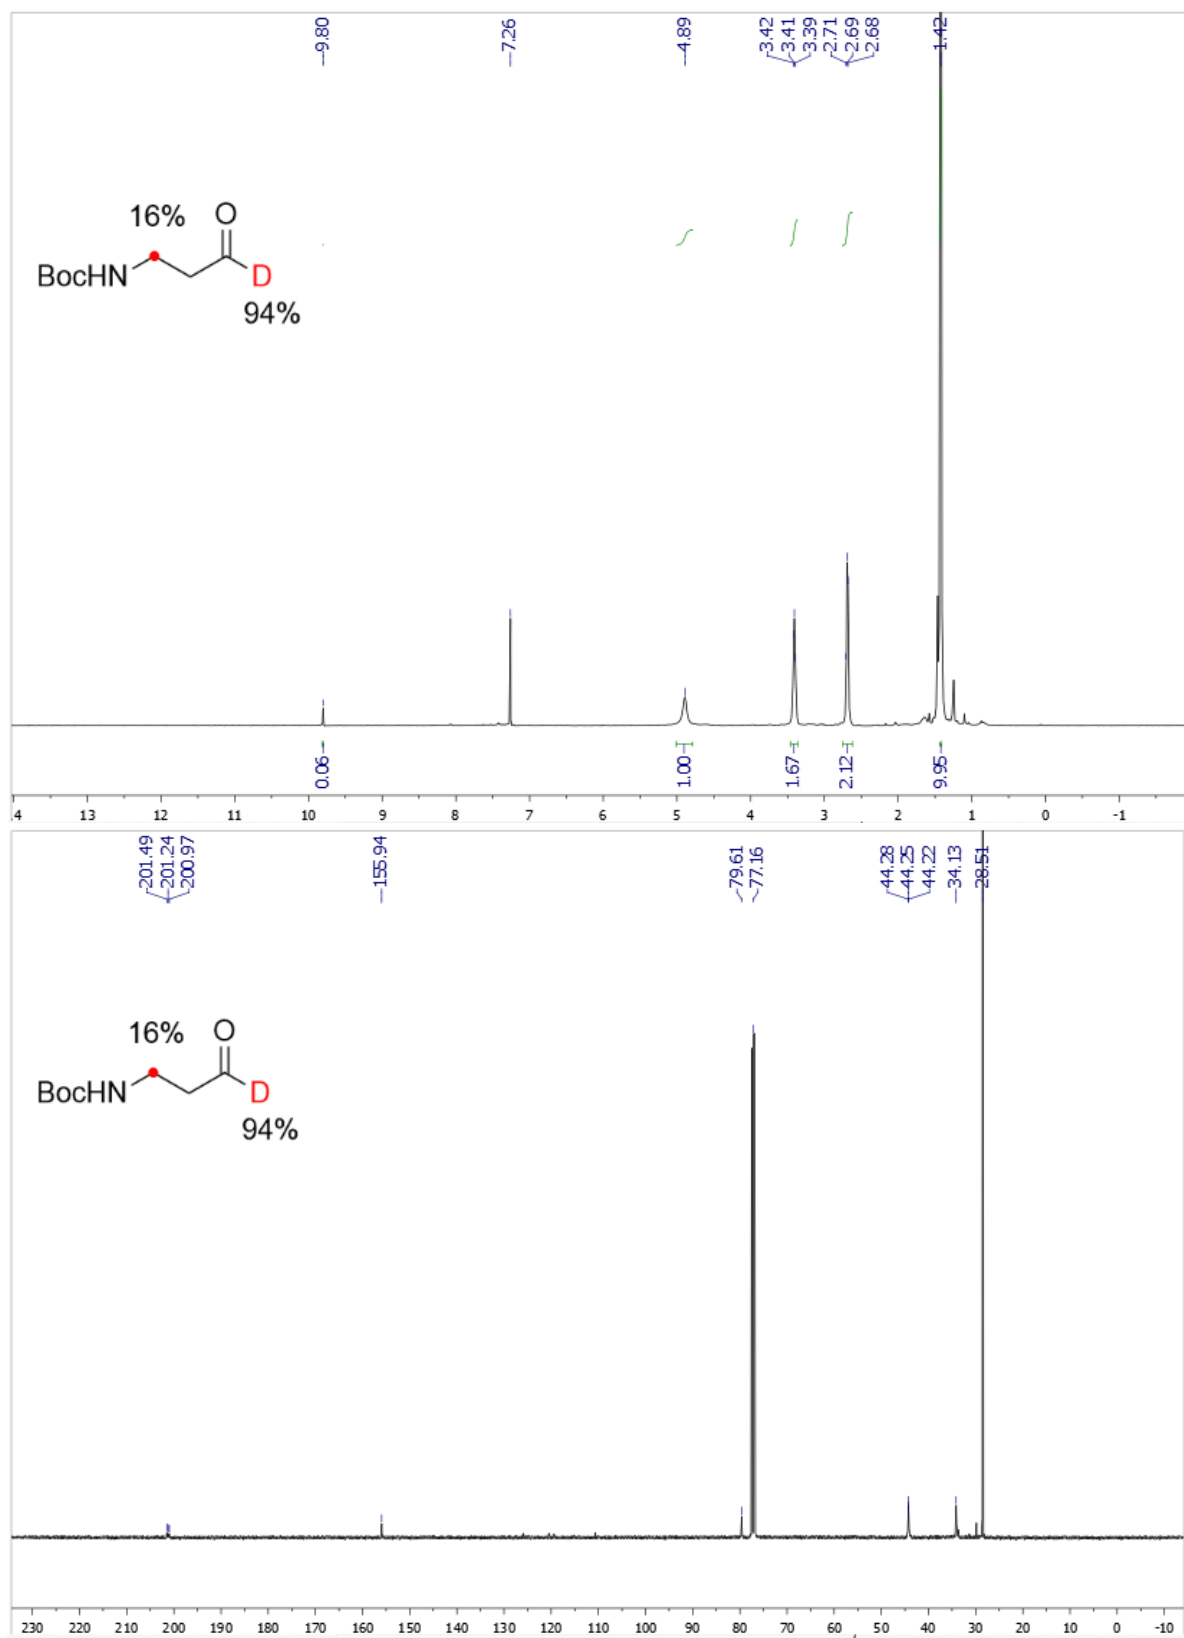

**4-Oxo-4-phenylbutanal-formyl-d1 (3ac)**

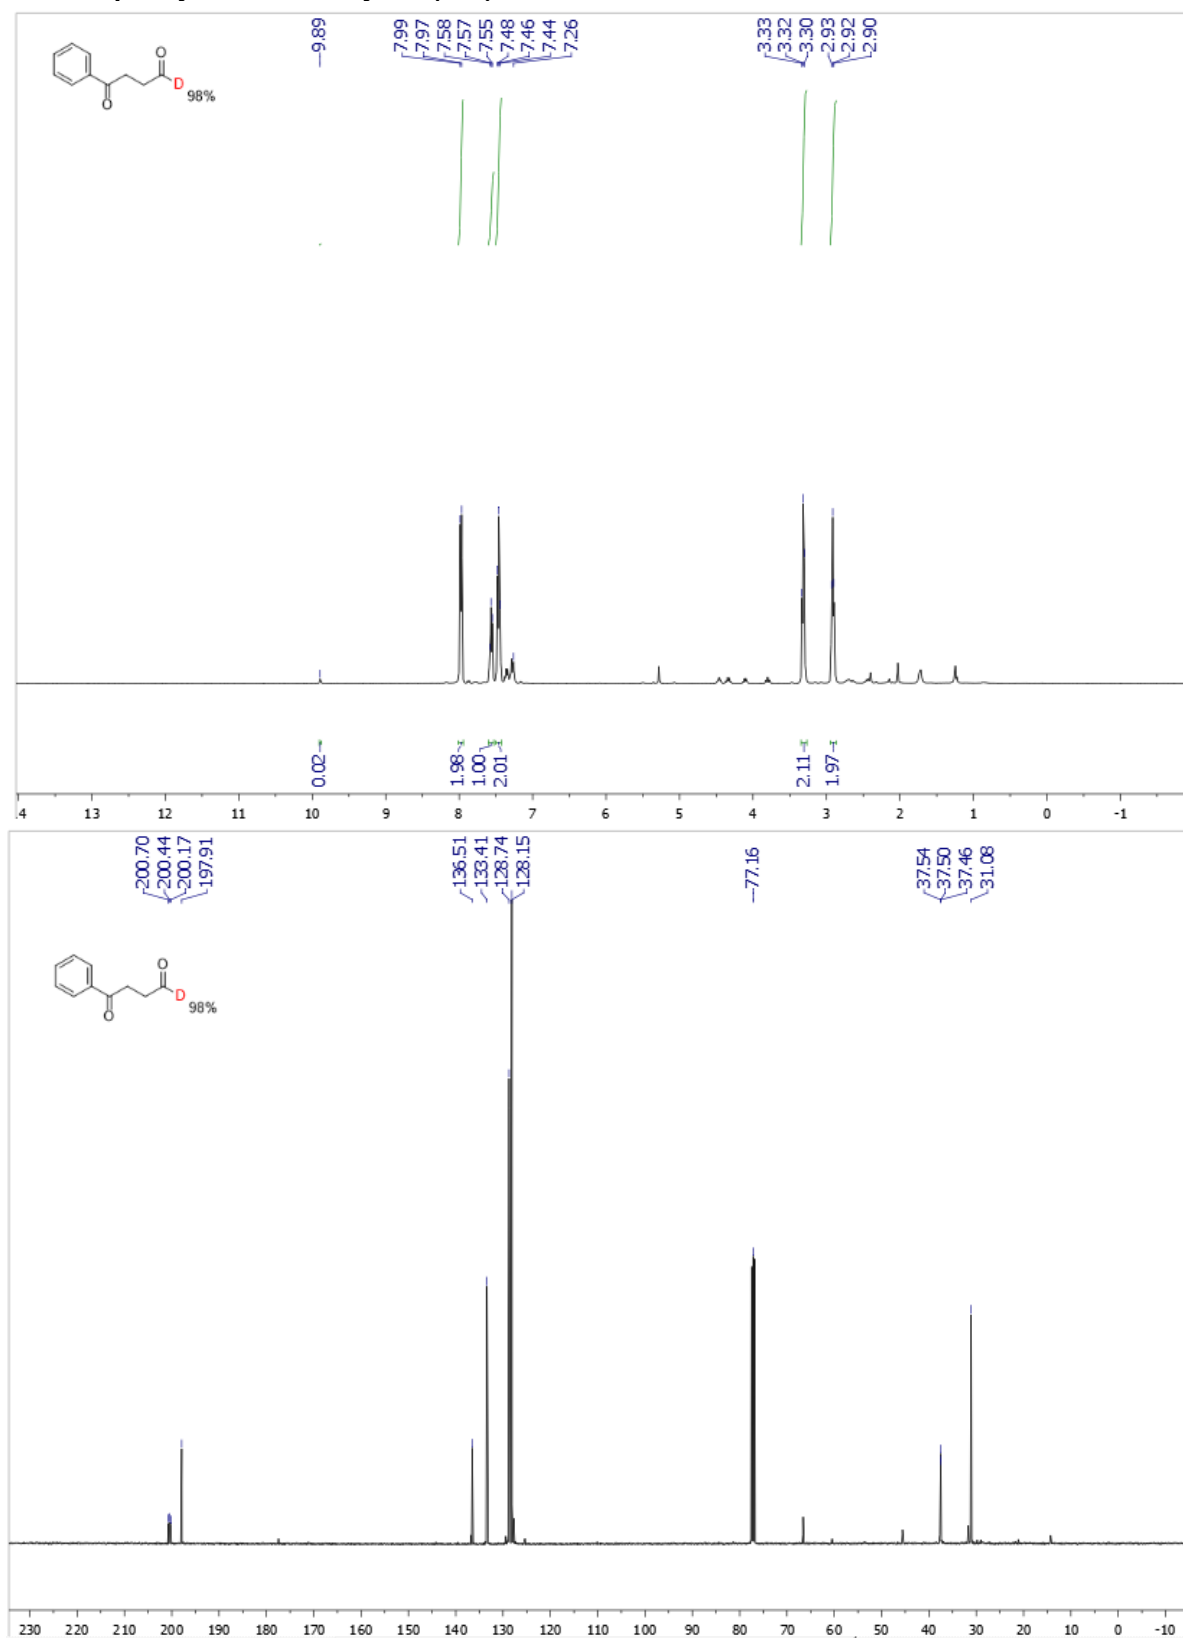



**Benzyl 4-oxobutanoate-*formyl-d1* (3ad)**

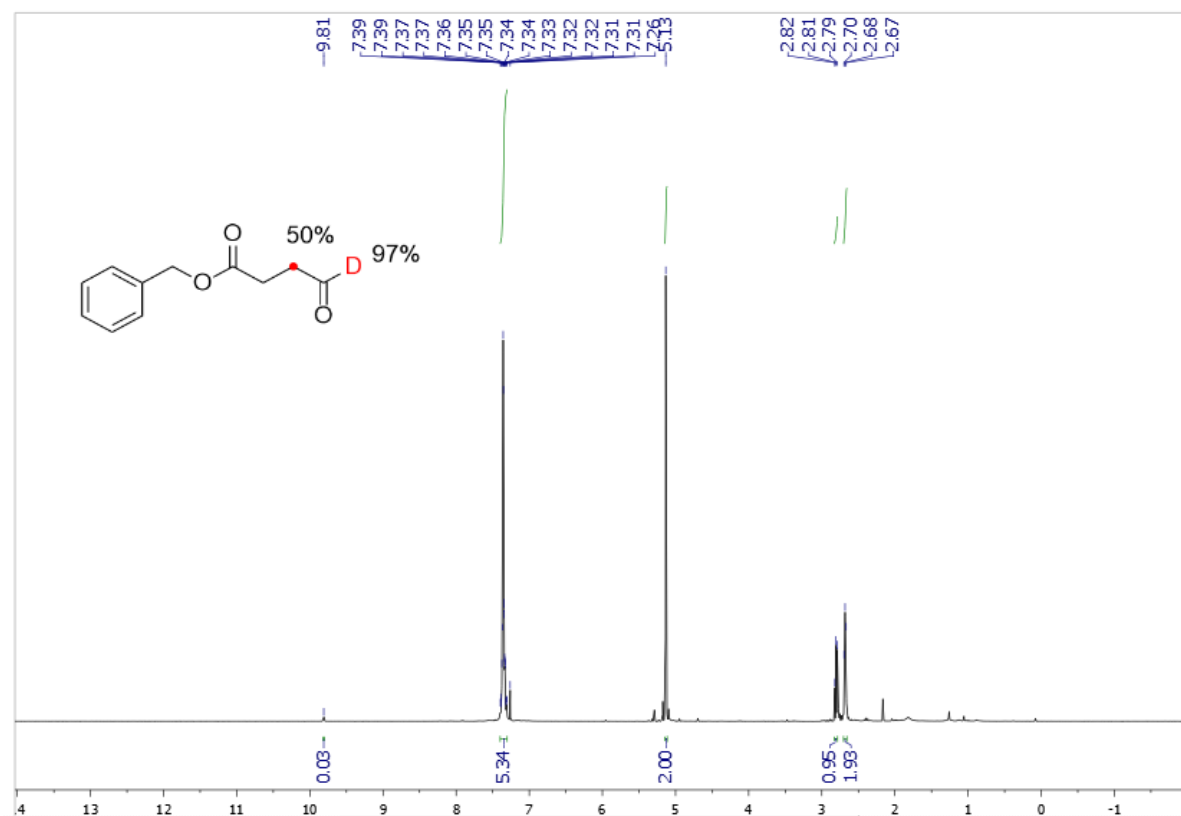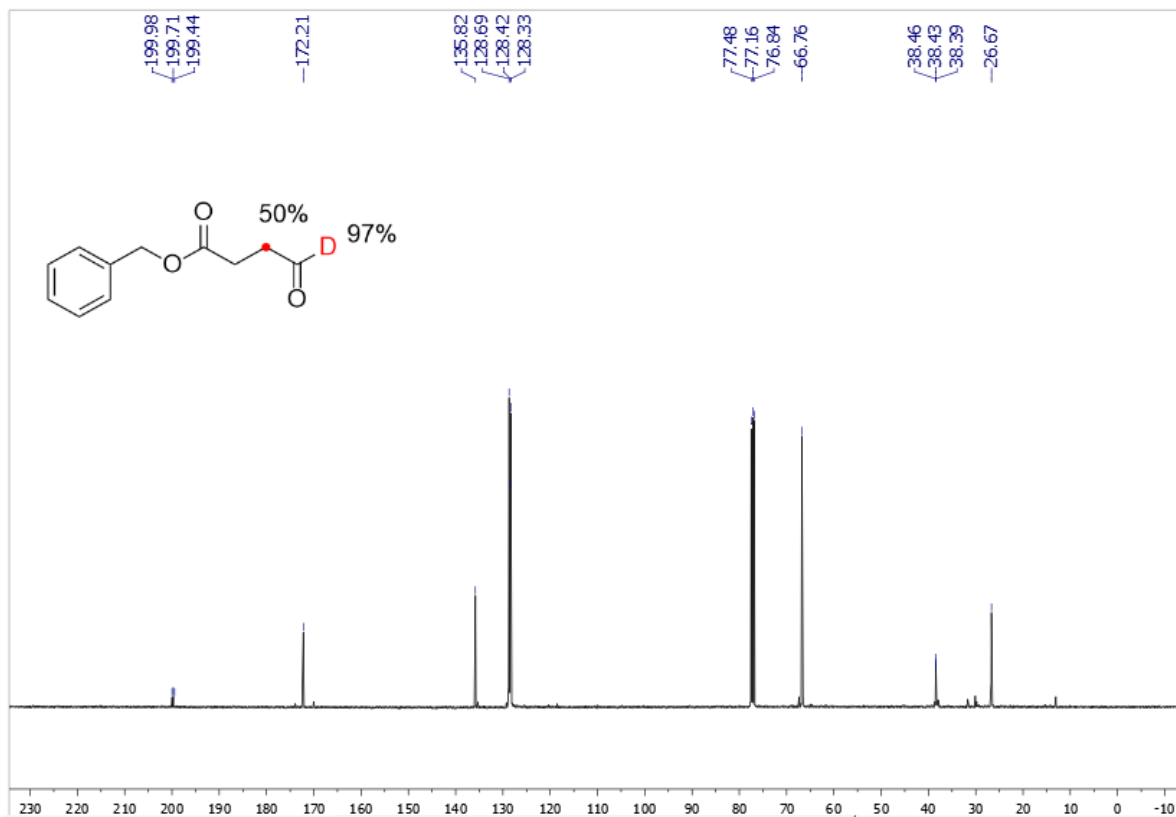

4-(3-Oxopropyl)benzonitrile-*formyl-d1* (3ae)

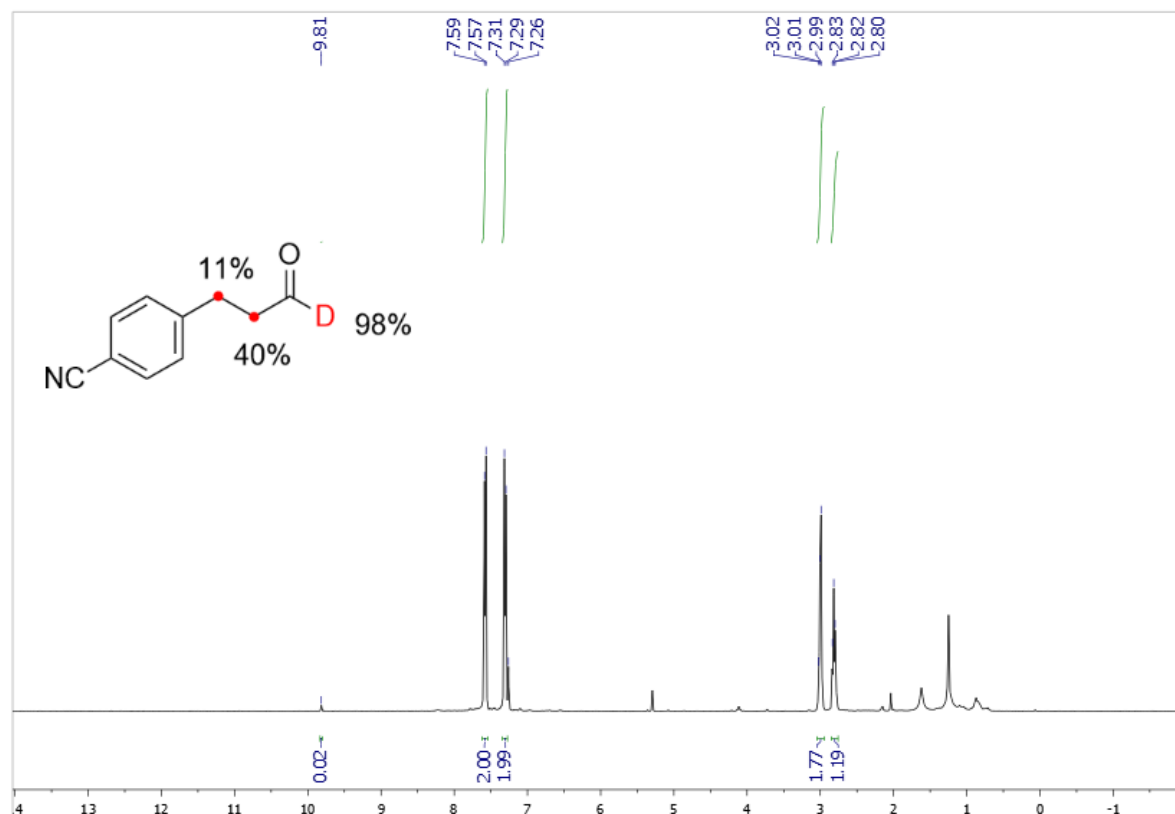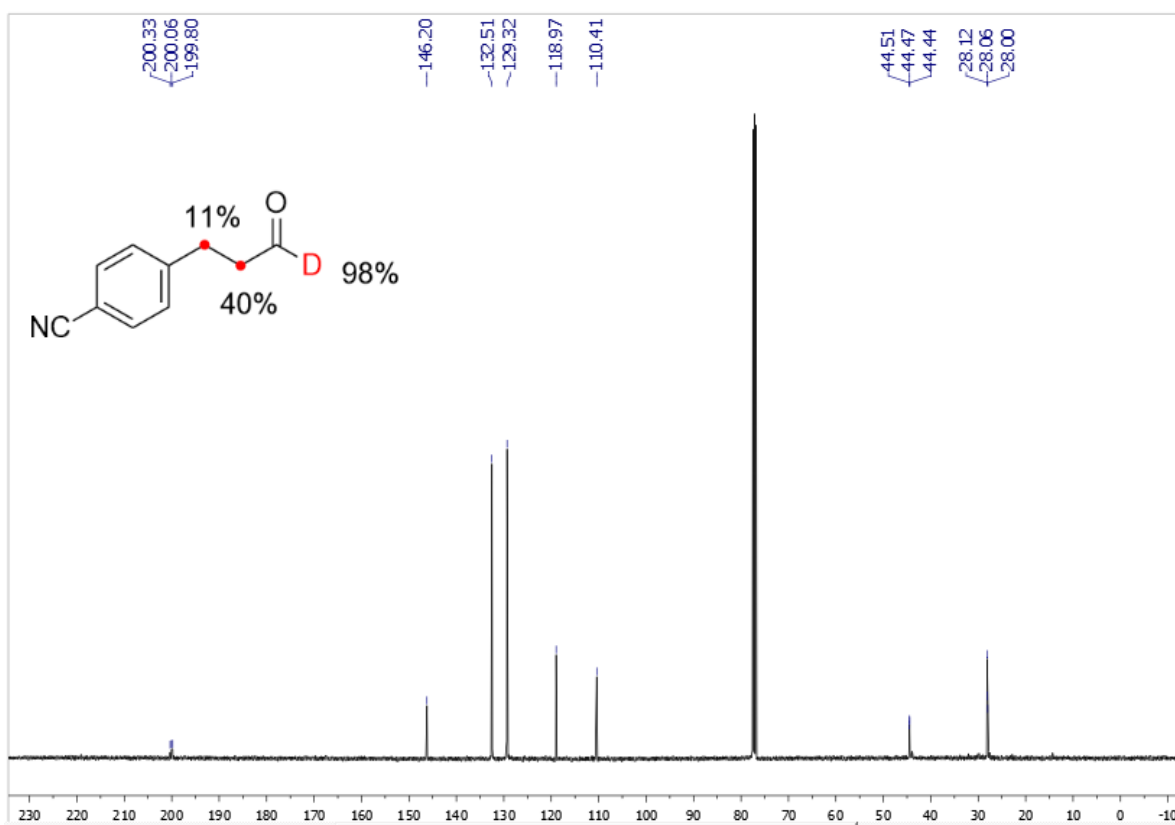

**3-Cyano-*N*-(3-oxopropyl)benzamide-*formyl-d1* (3af)**

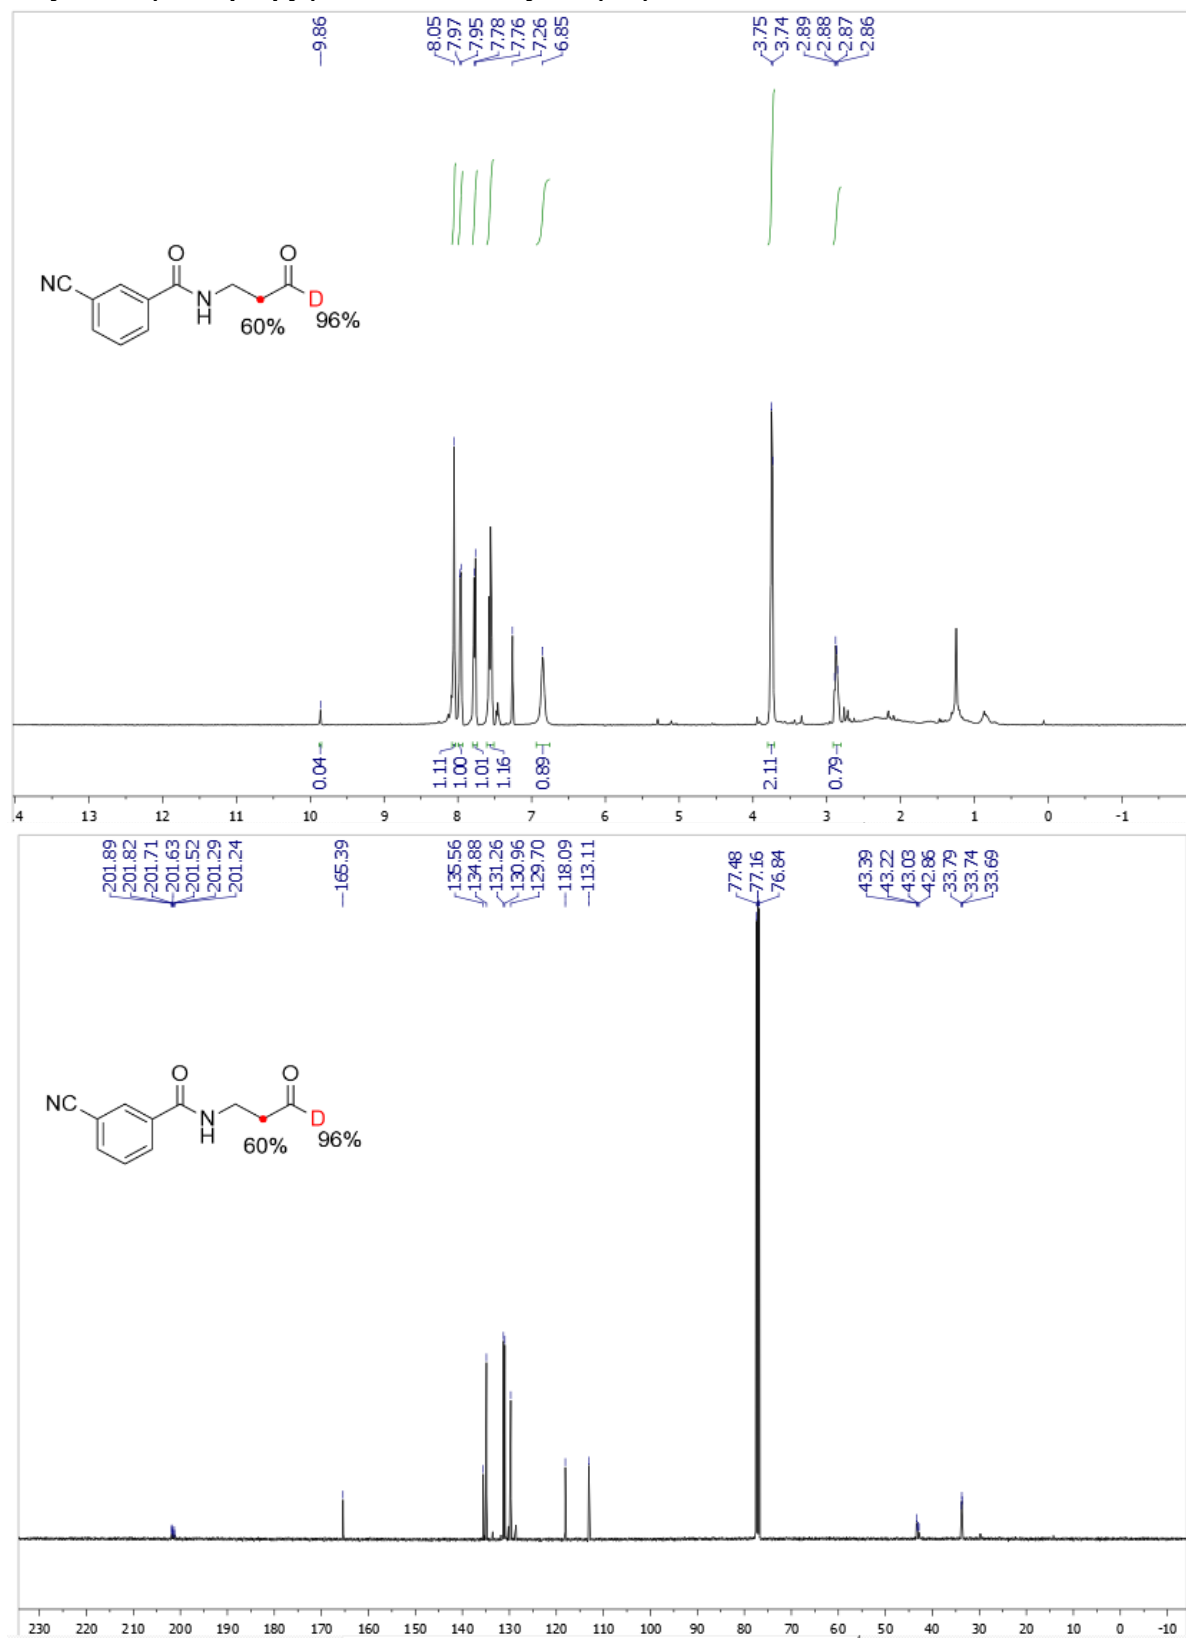

**3-(Pyridin-4-yl)propanal-formyl-d1 (3ag)**

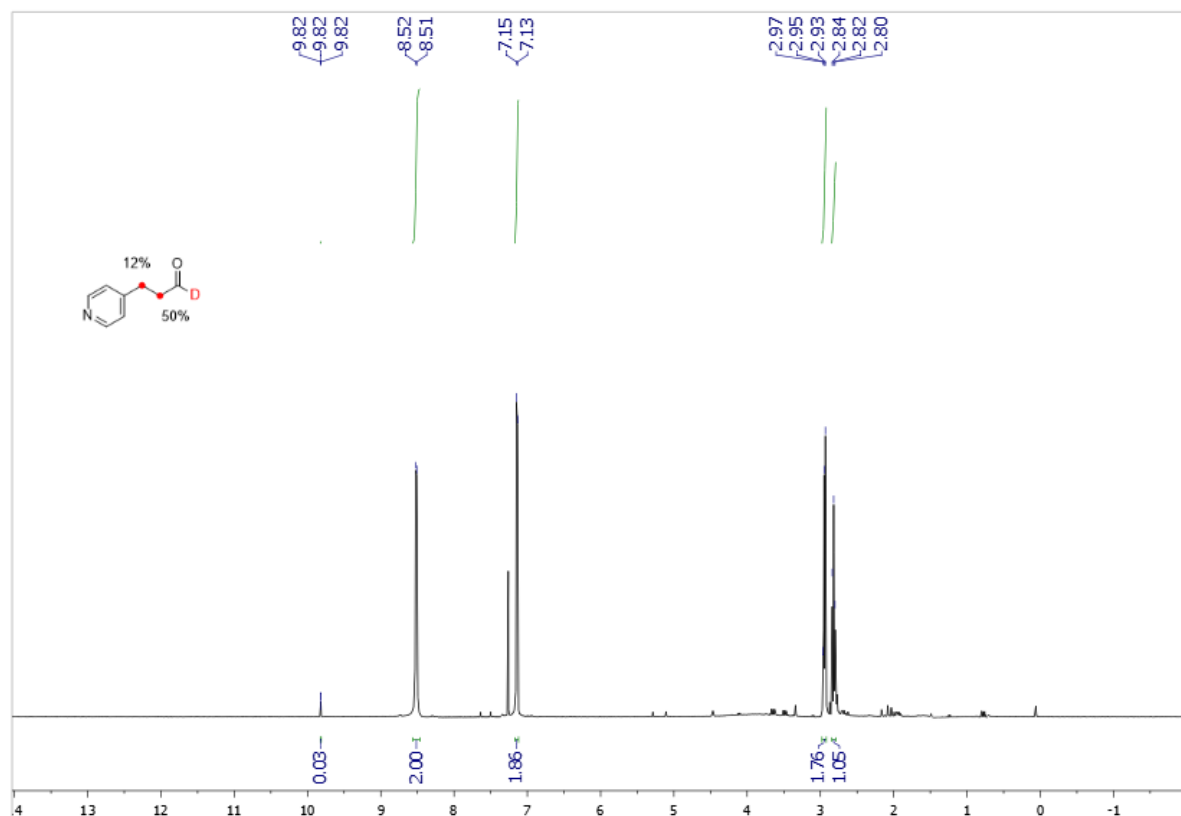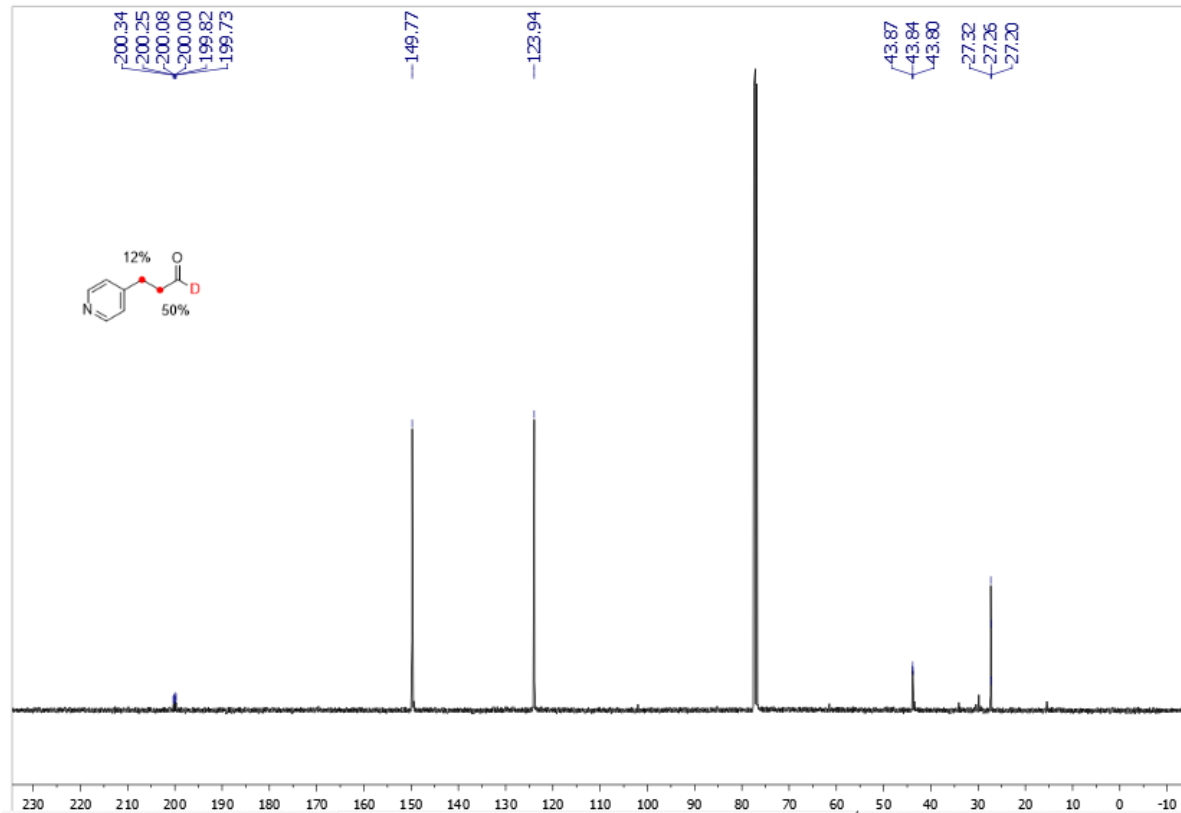

**3-(1*H*-indol-3-yl)propanal-*formyl-d*1 (3ah)**

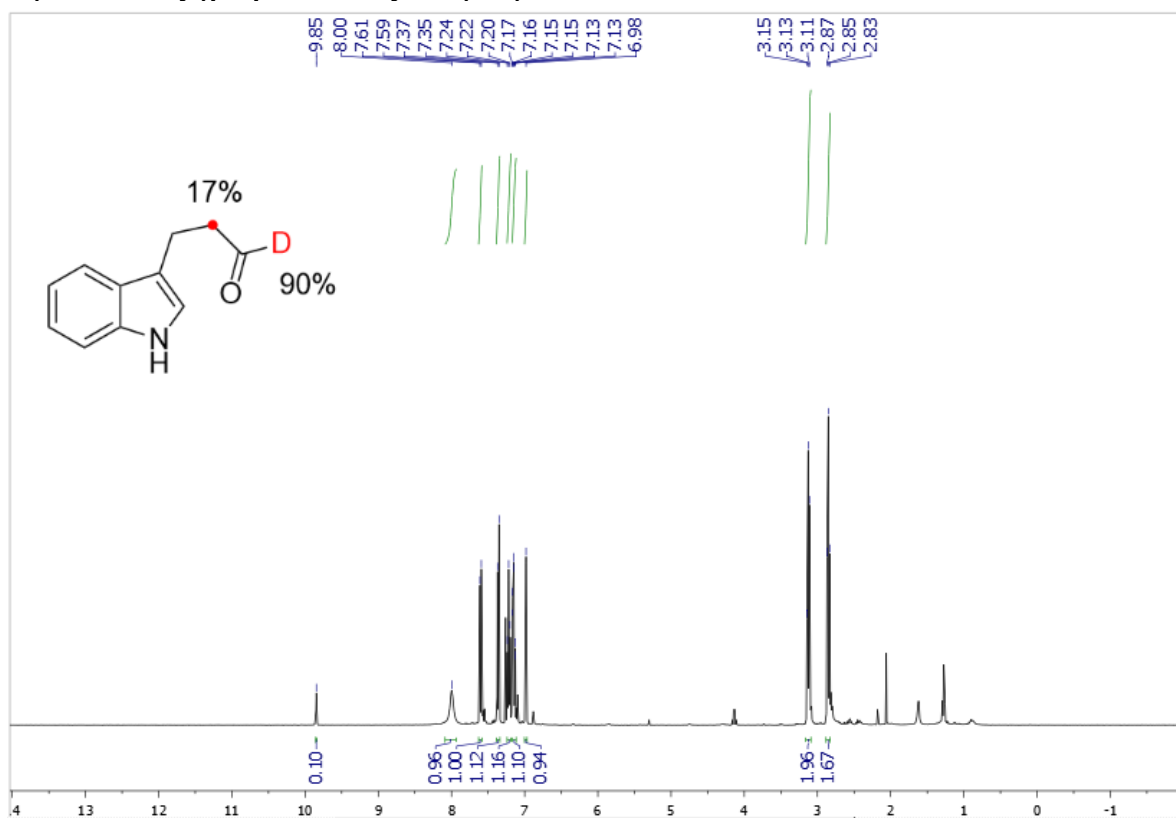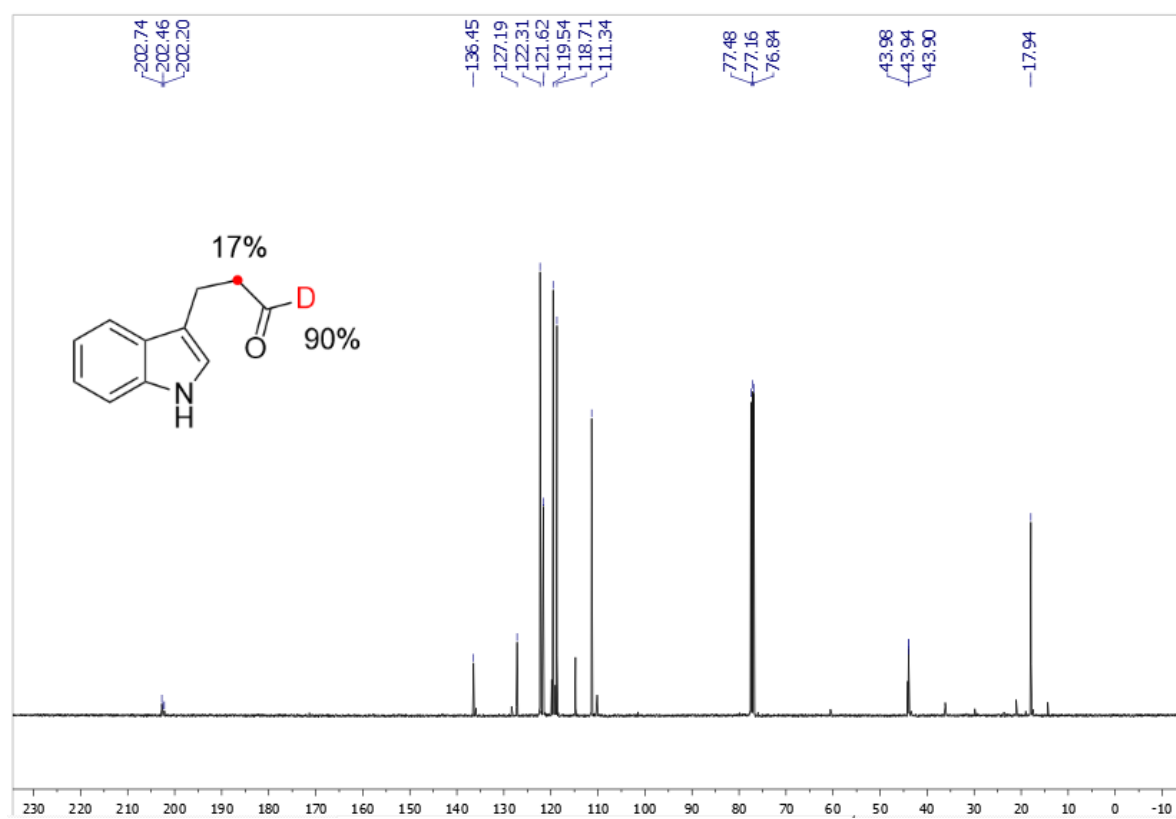

**3-(5-Methylfuran-2-yl)butanal-*formyl-d*1 (3ai)**

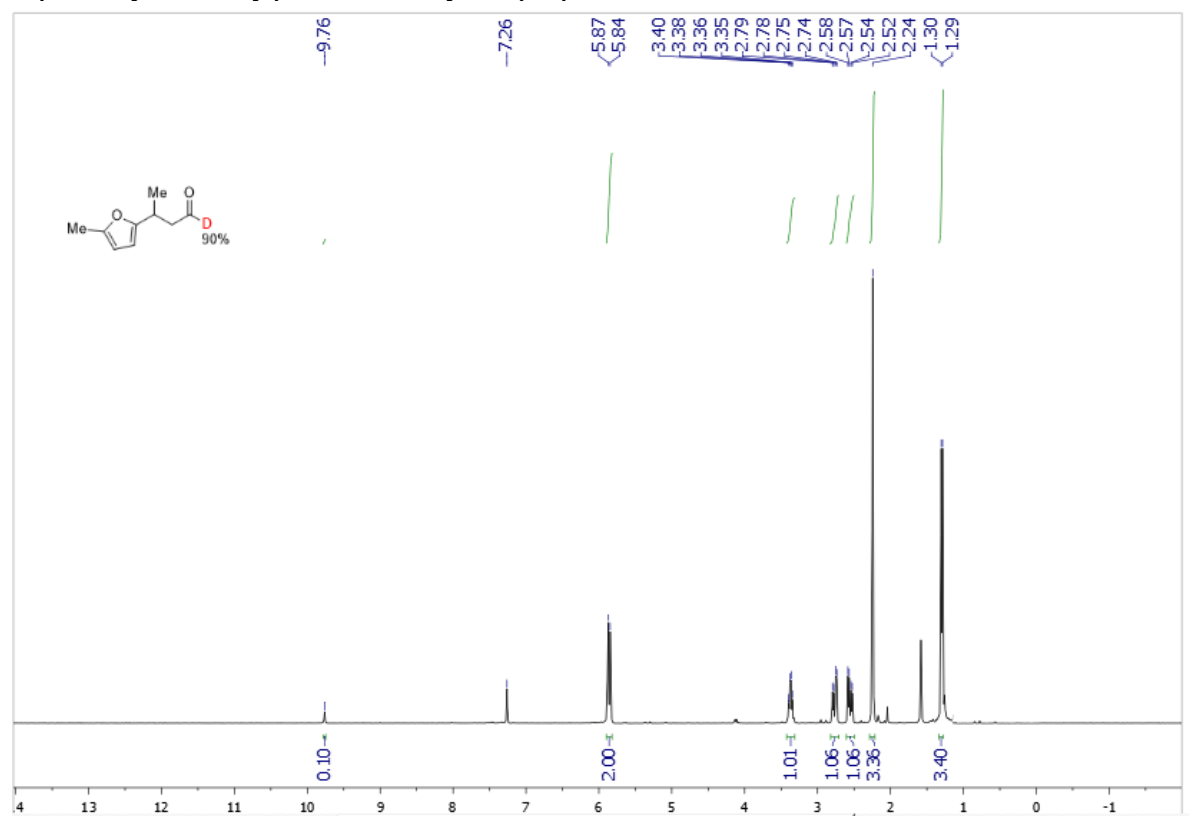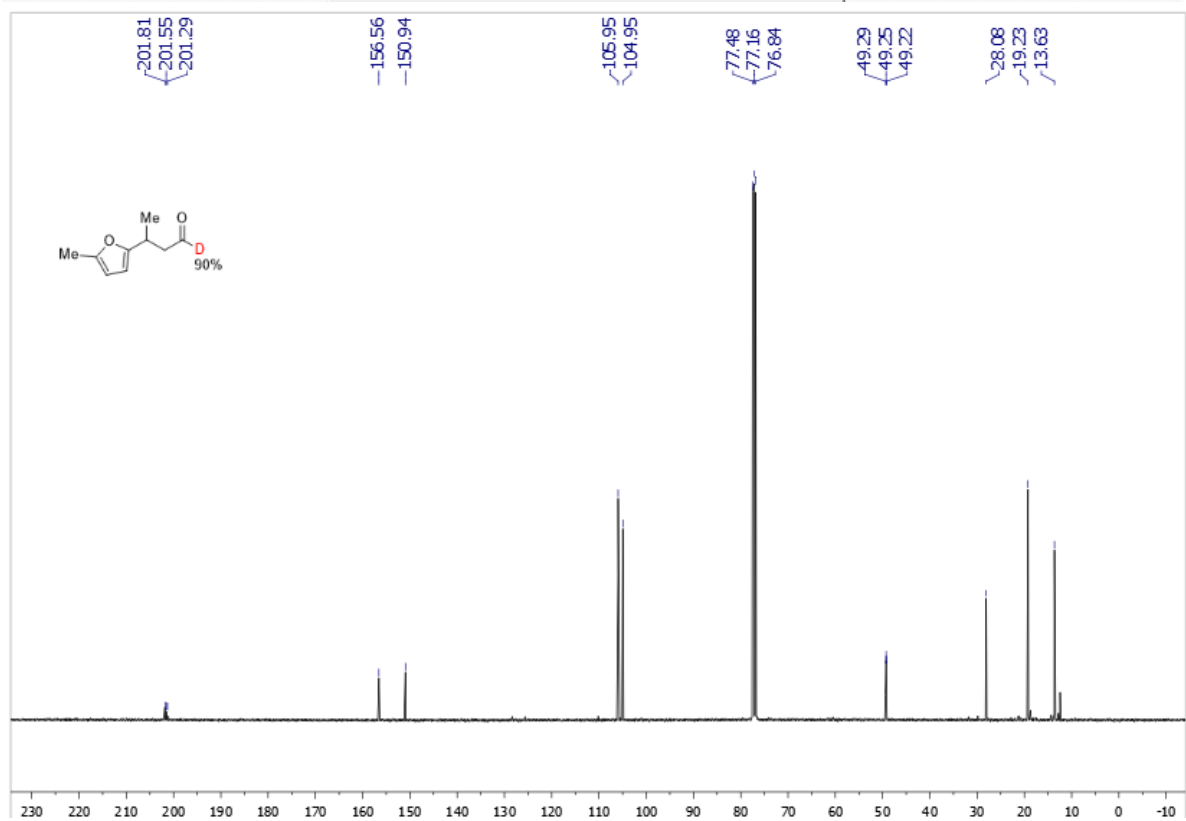

**3-(Thiophen-2-yl)propanal-formyl-d1 (3aj)**

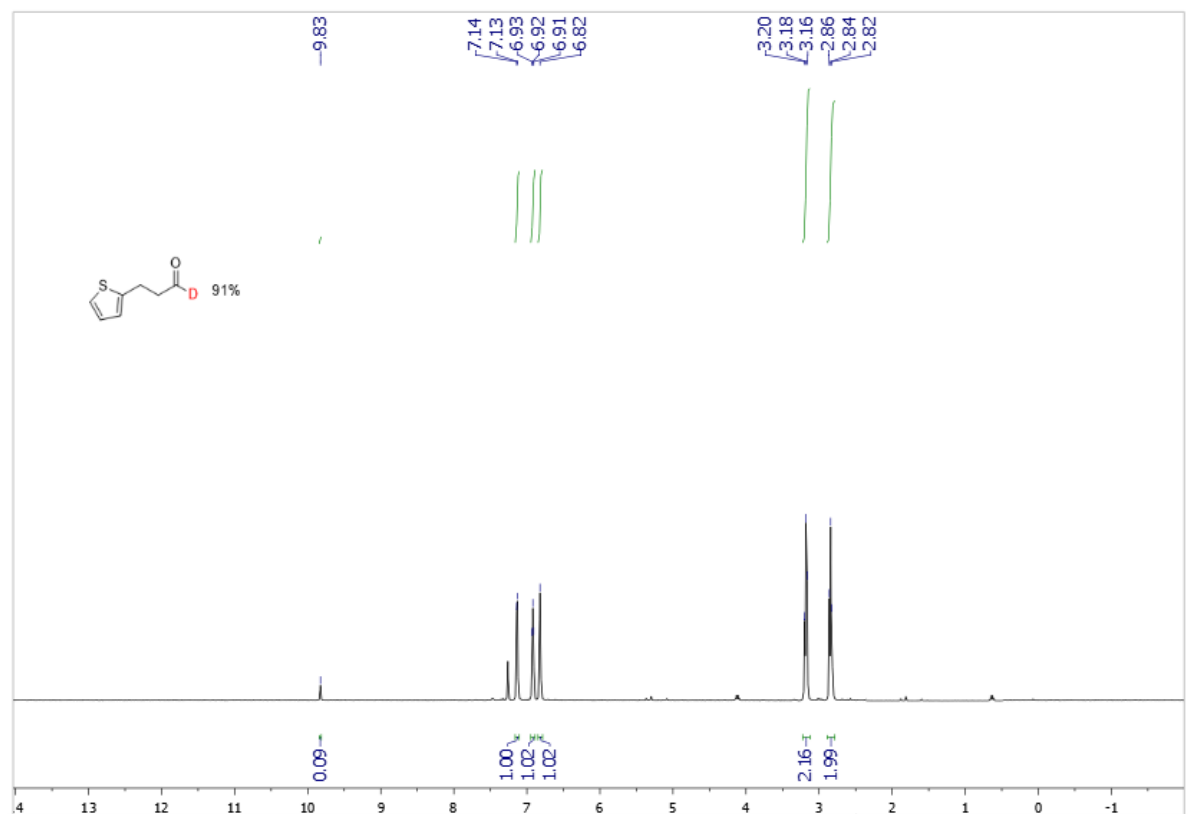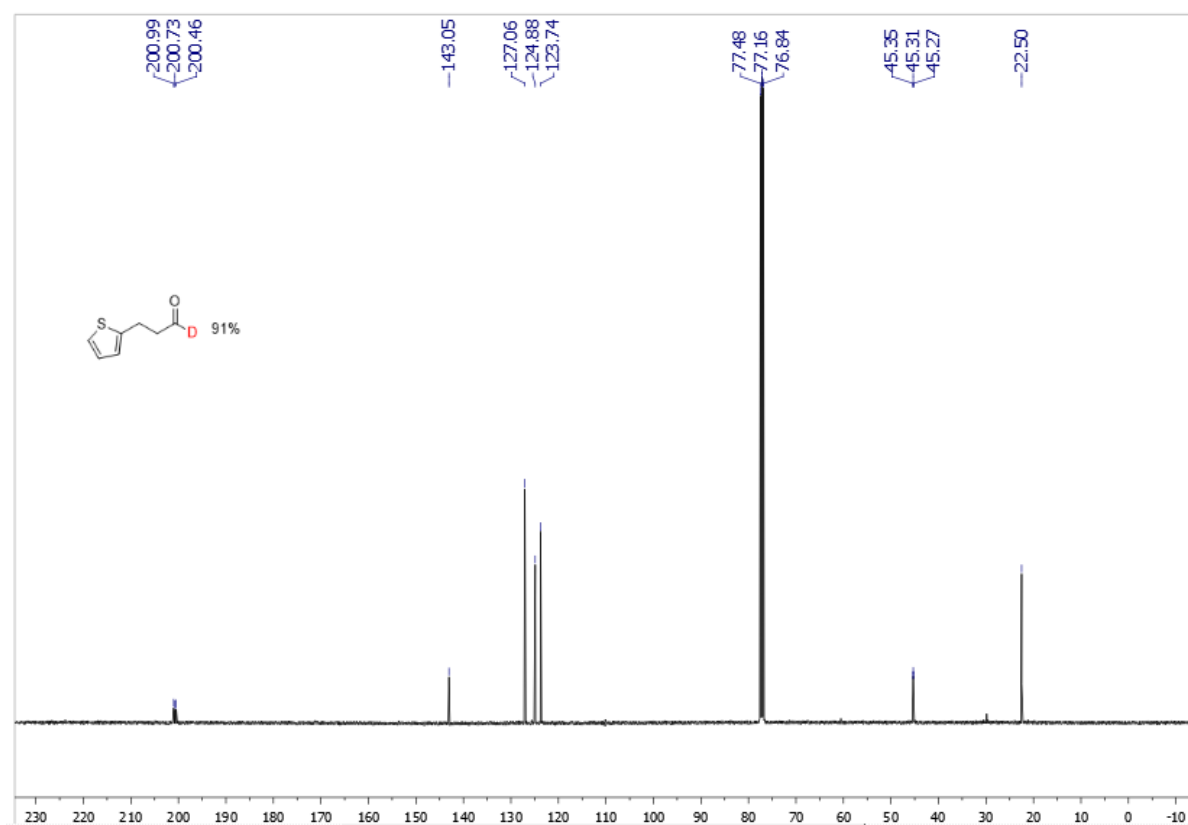

**3-(2,4-Dimethoxypyrimidin-5-yl)propanal-*formyl-d*1 (3ak)**

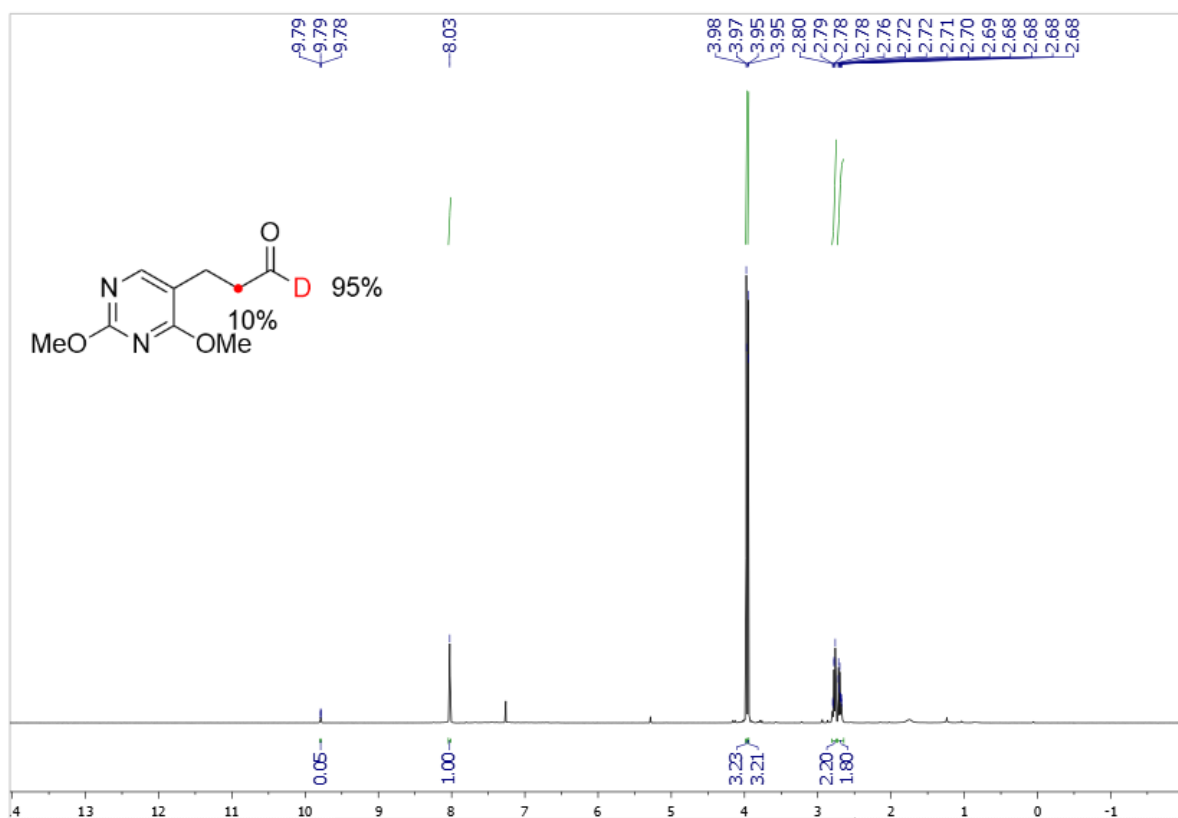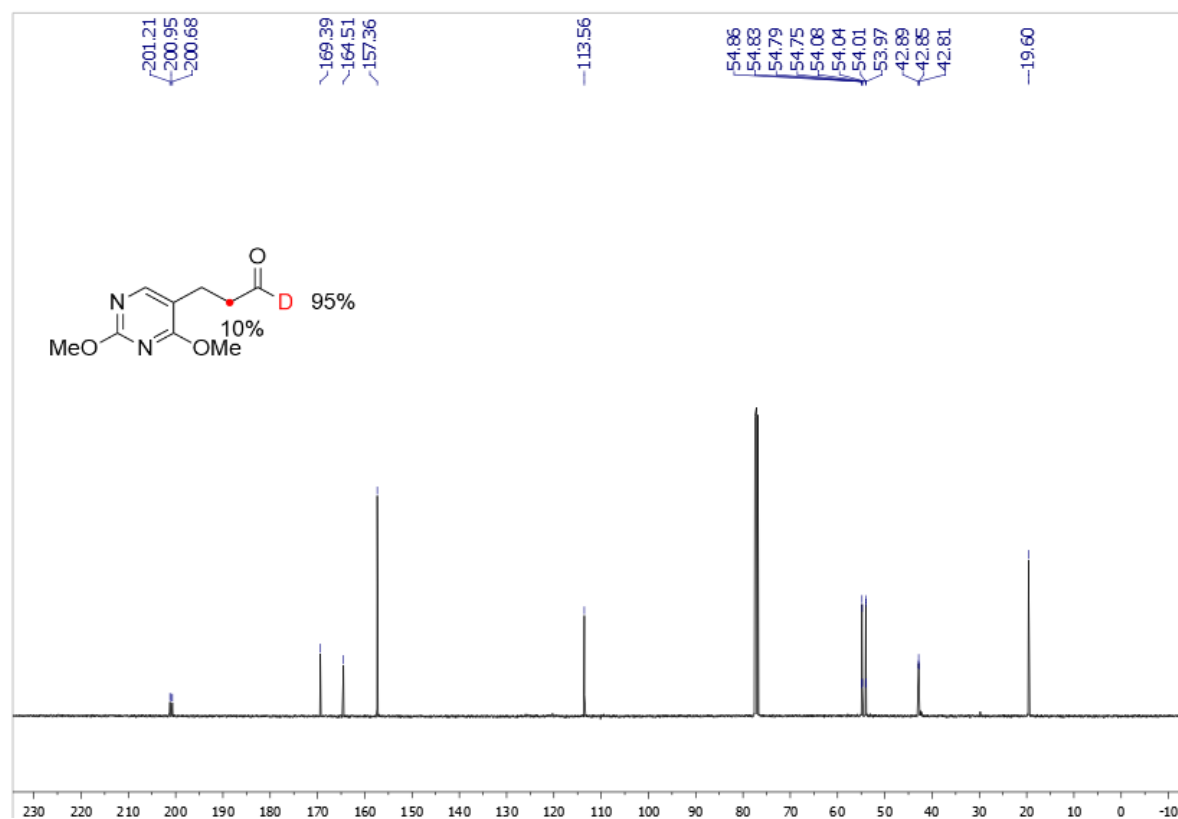



Dodecanal-formyl-d1 (3aI)

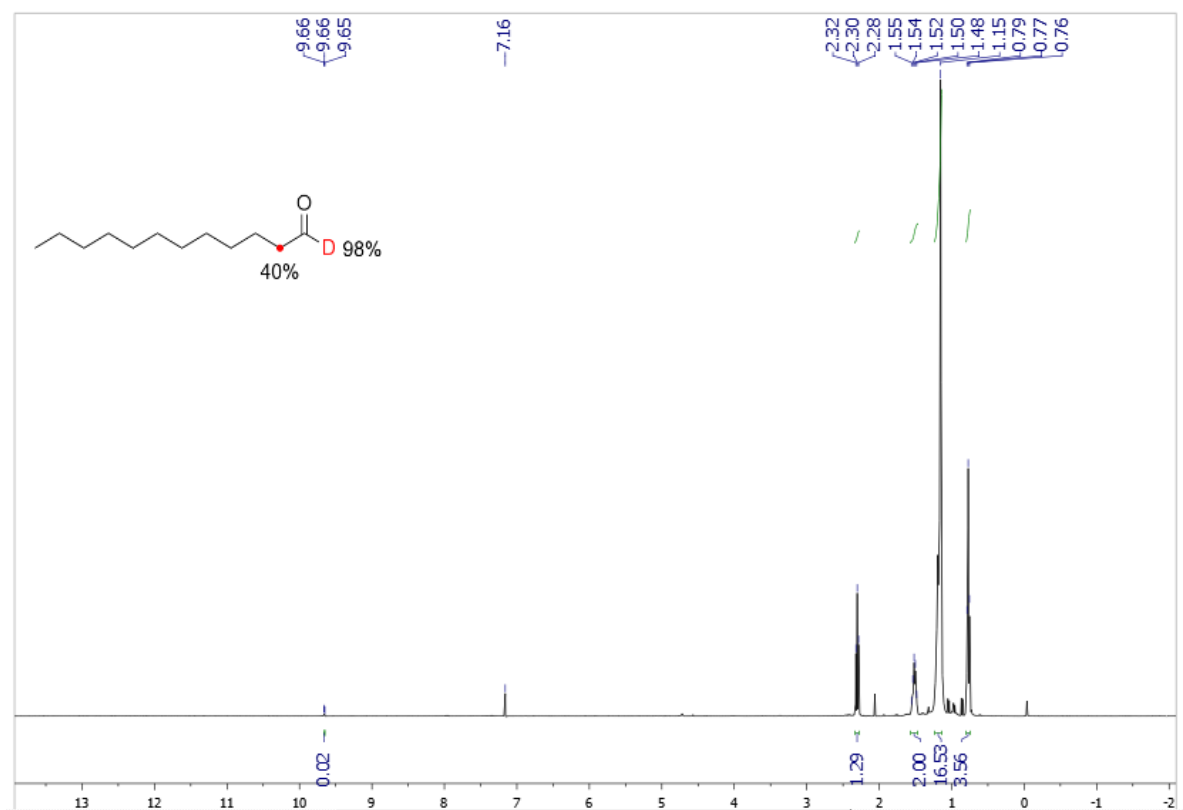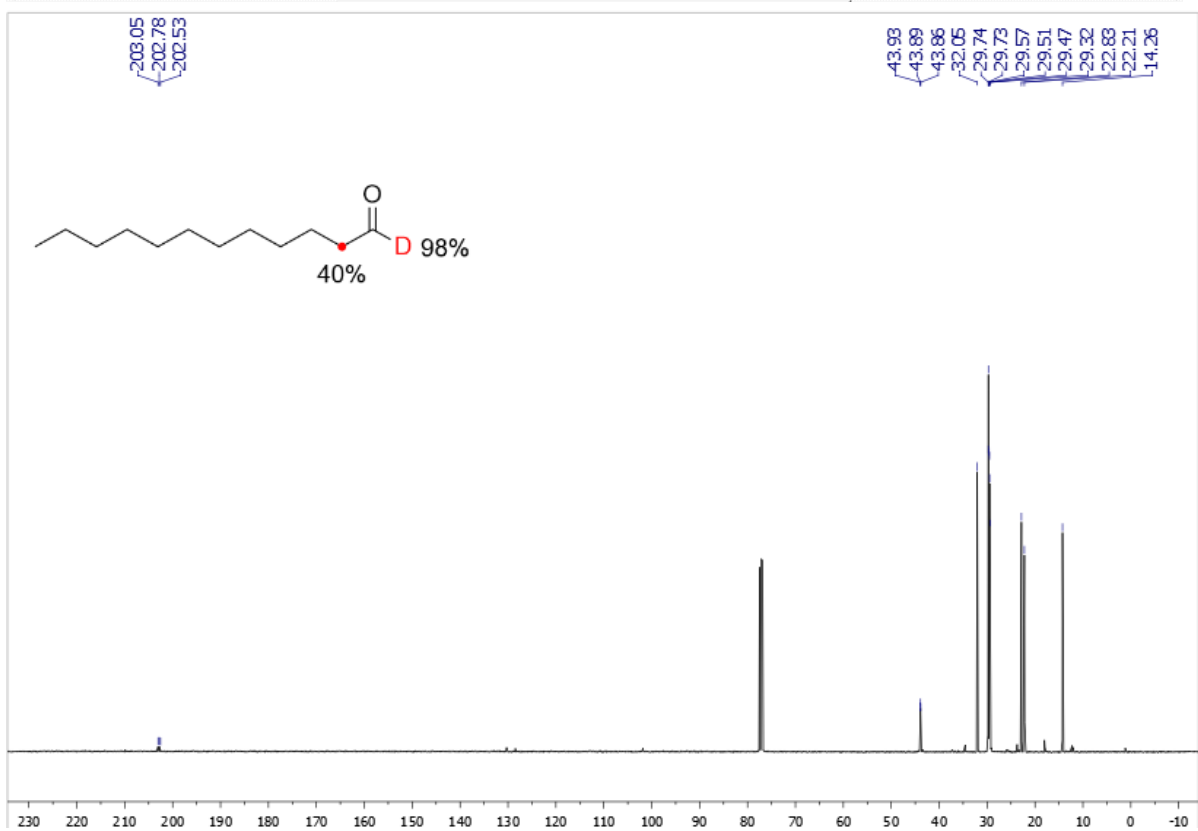

Olealdehyde-formyl-d1 (3am)

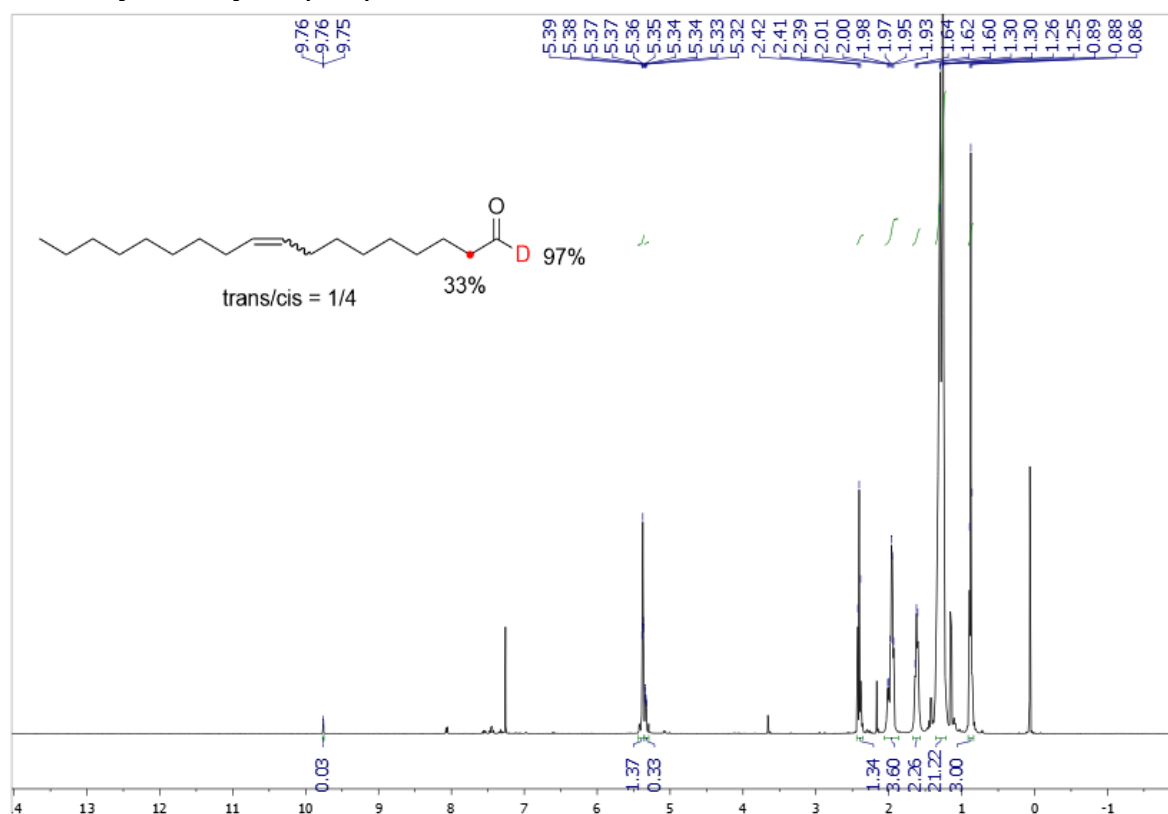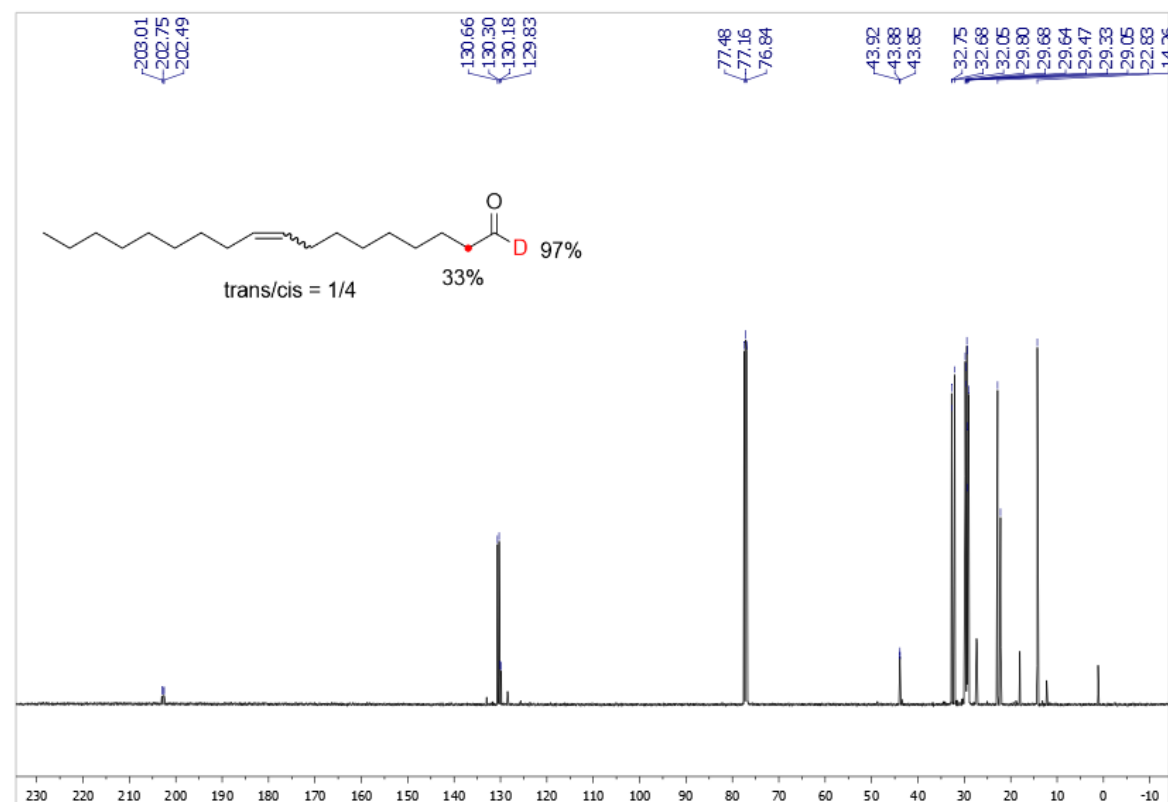

**(E)-6-(4-hydroxy-6-methoxy-7-methyl-3-oxo-1,3-dihydroisobenzofuran-5-yl)-4-methylhex-4-enal-formyl-d1 (3an)**

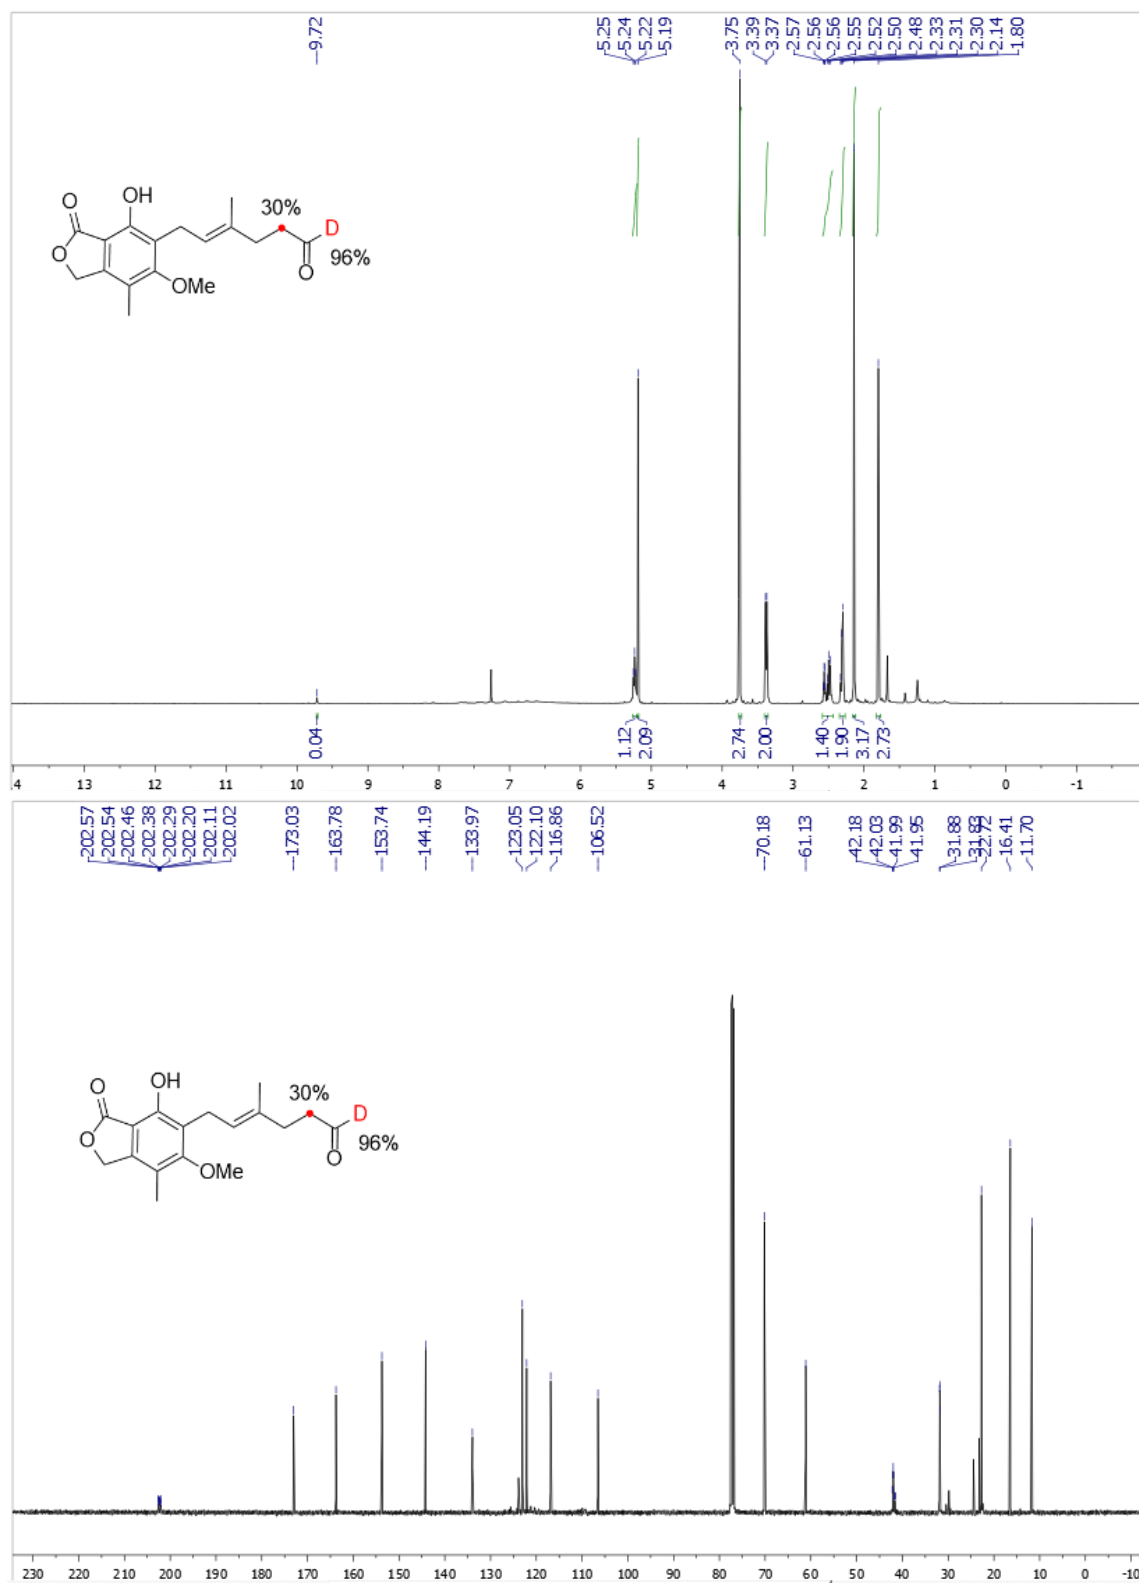

**(R)-4-((3R,5S,7S,8R,9S,10S,13R,14S,17R)-3,7-dihydroxy-10,13-dimethylhexadecahydro-1H-cyclopenta[a]phenanthrene-17-yl)pentanal-formyl-d1 (3ao)**

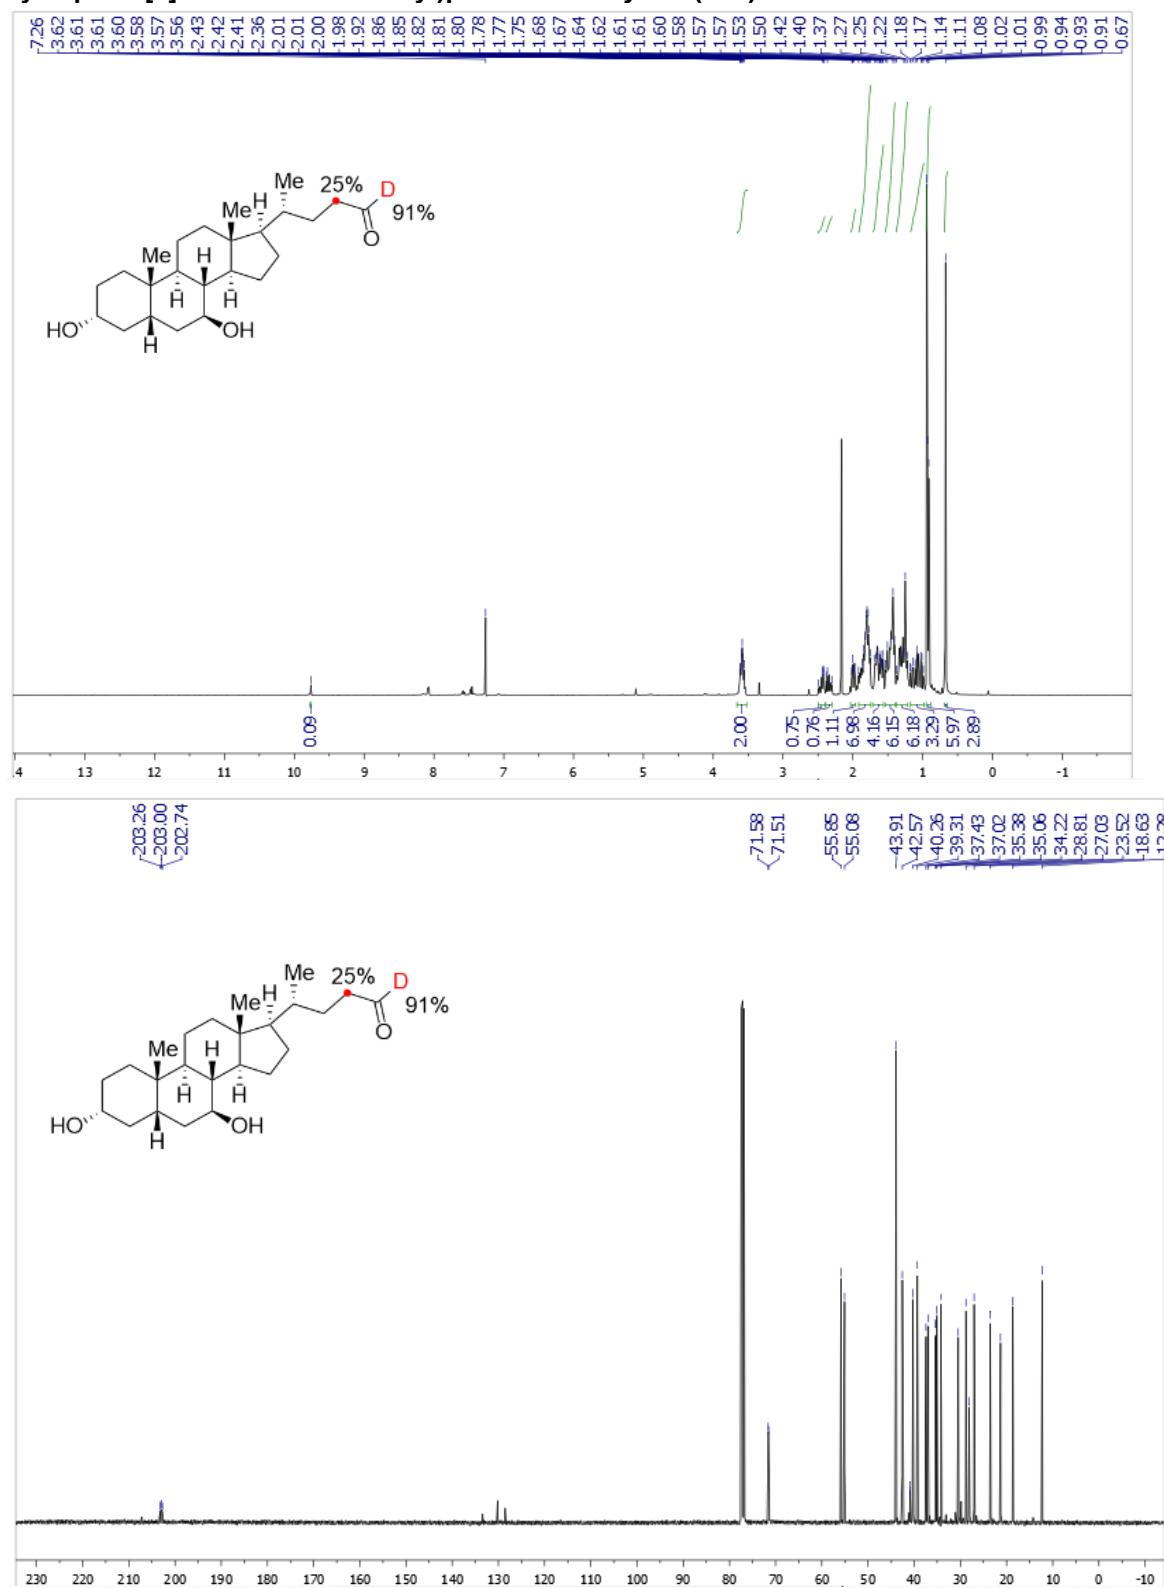

4-Formylphenyl 2-(1-(4-chlorobenzoyl)-5-methoxy-2-methyl-1H-indol-3-yl)acetate-formyl-d1 (3ap)

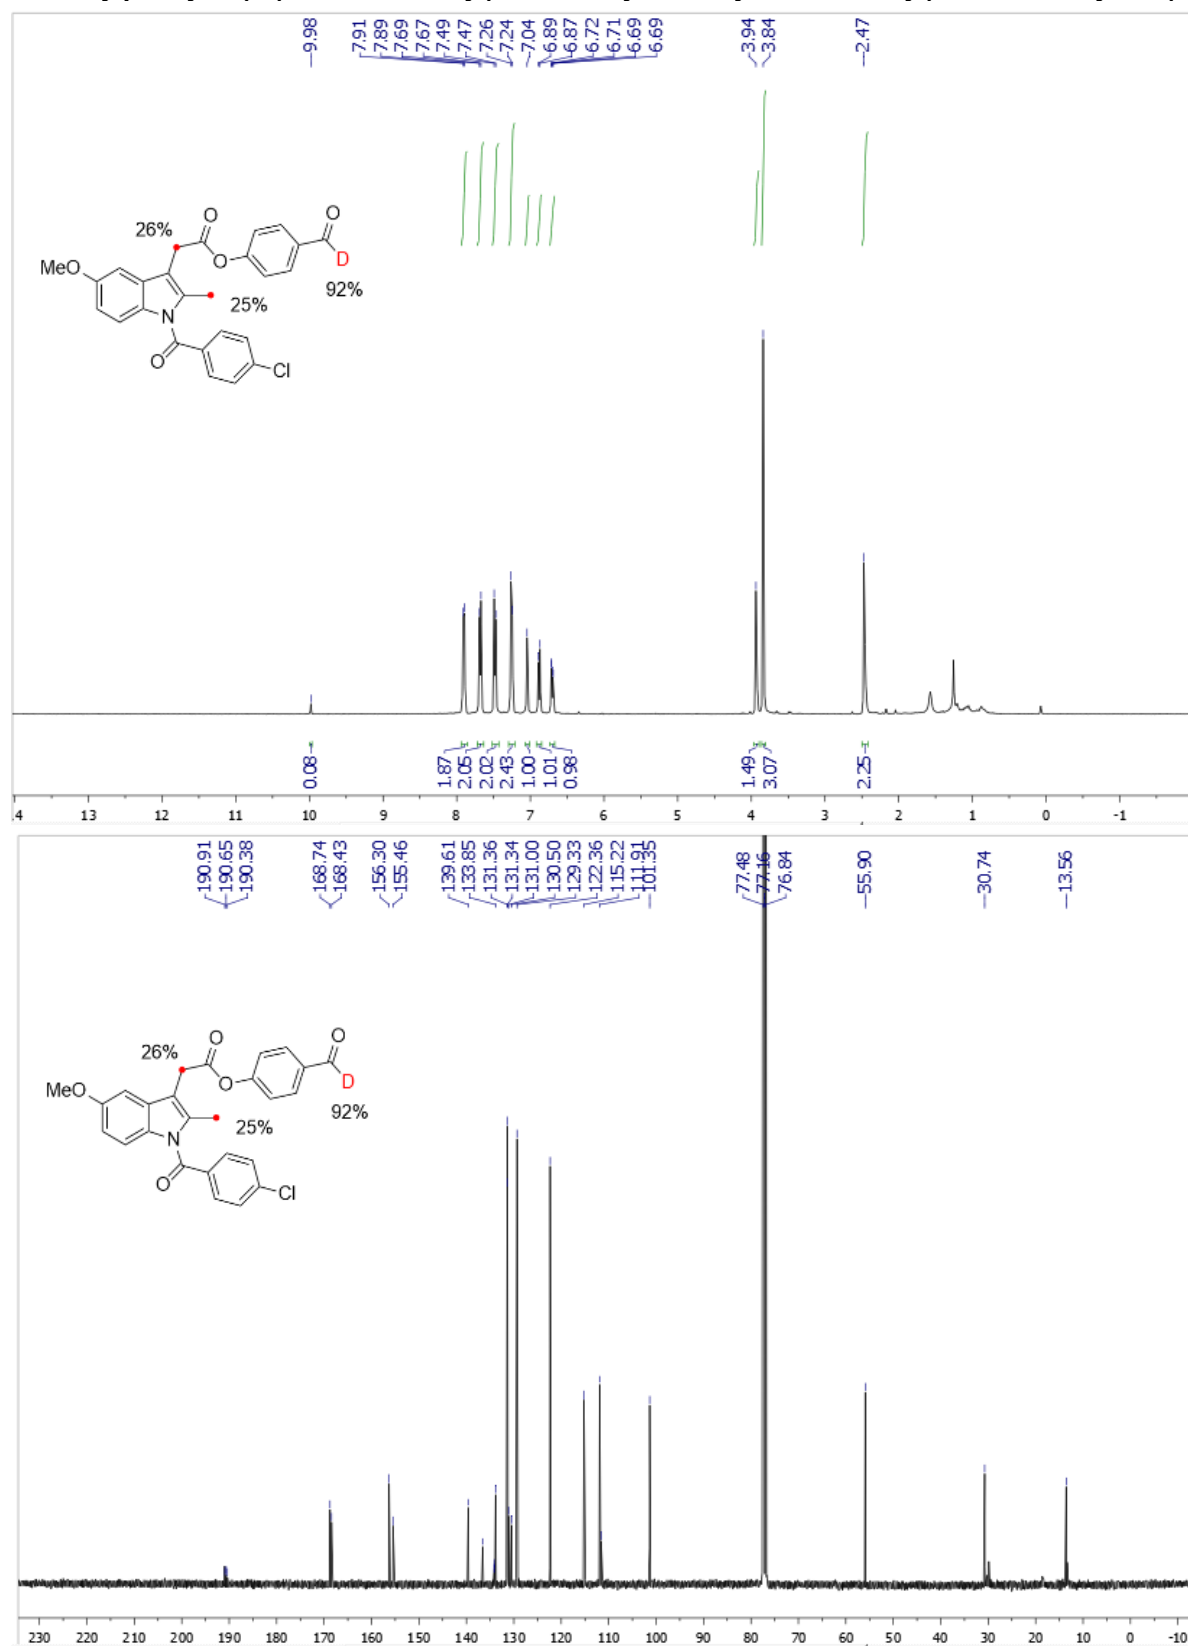

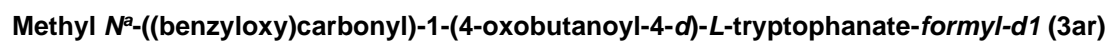

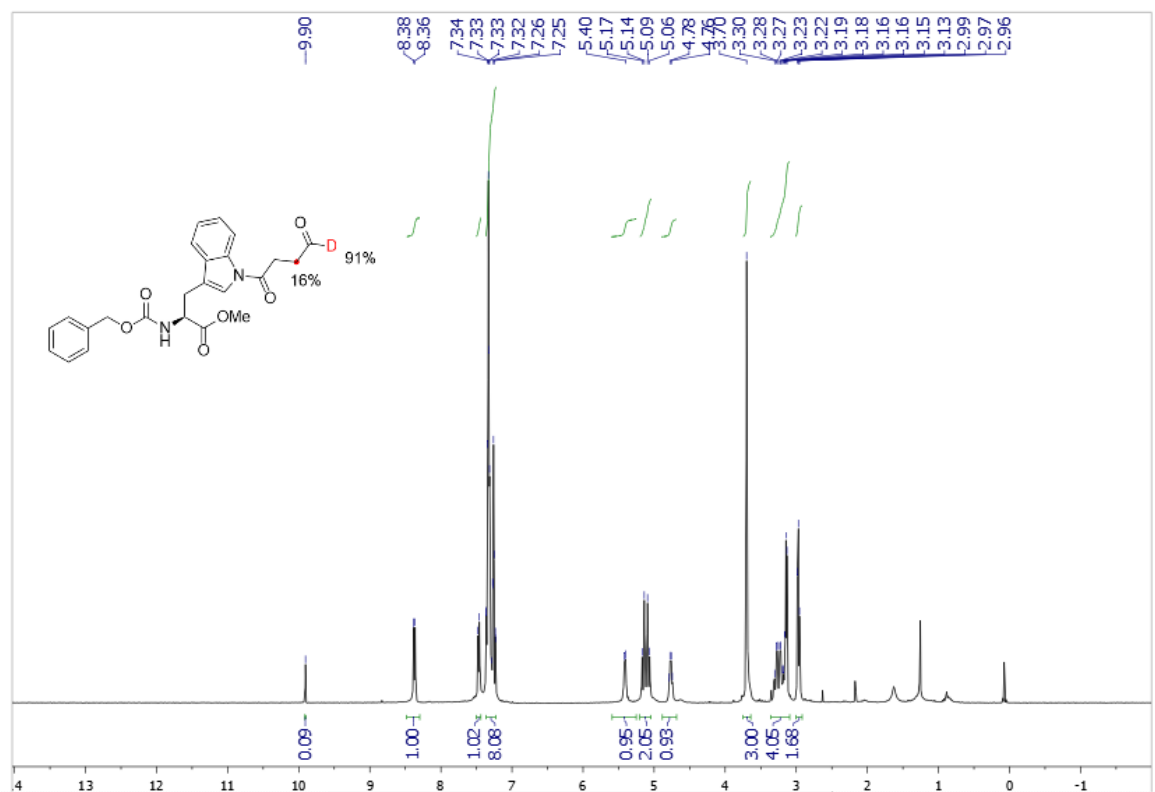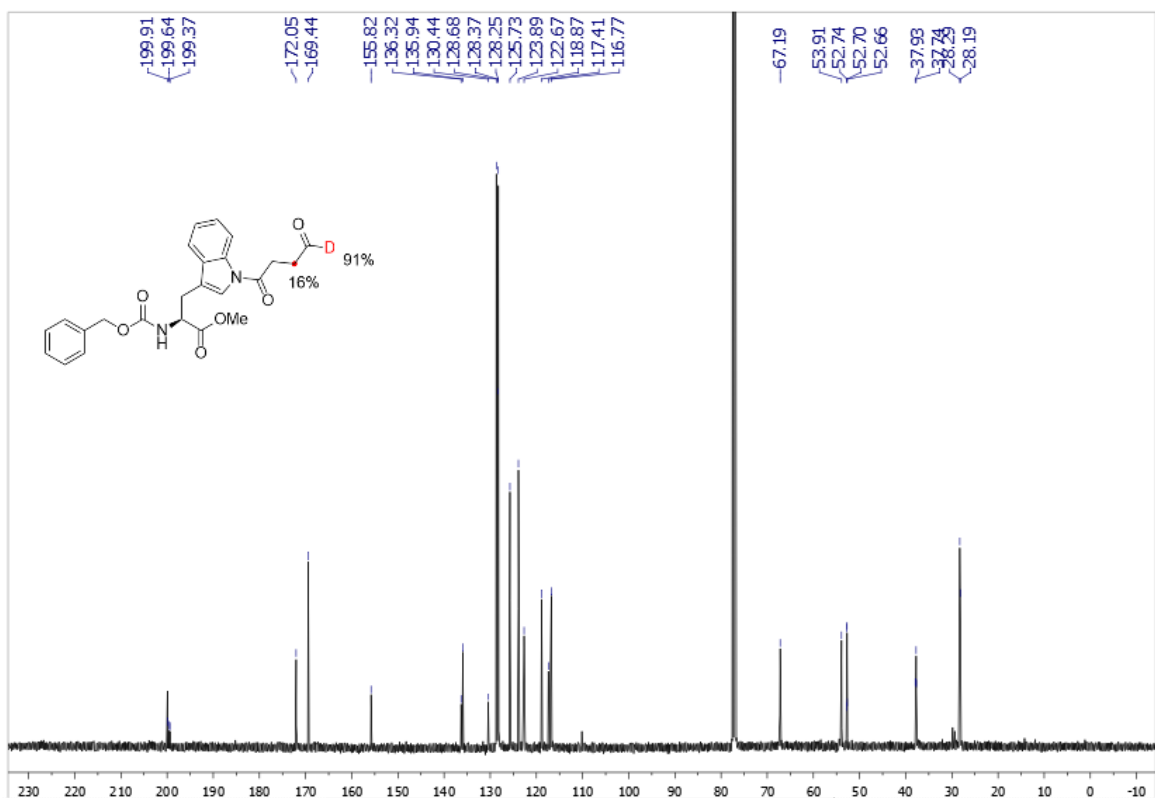

***tert*-butyl (S)-1-oxo-1-((2-oxo-2-((3-oxopropyl)amino)ethyl)amino)-3-phenylpropan-2-yl)carbamate (3as)**

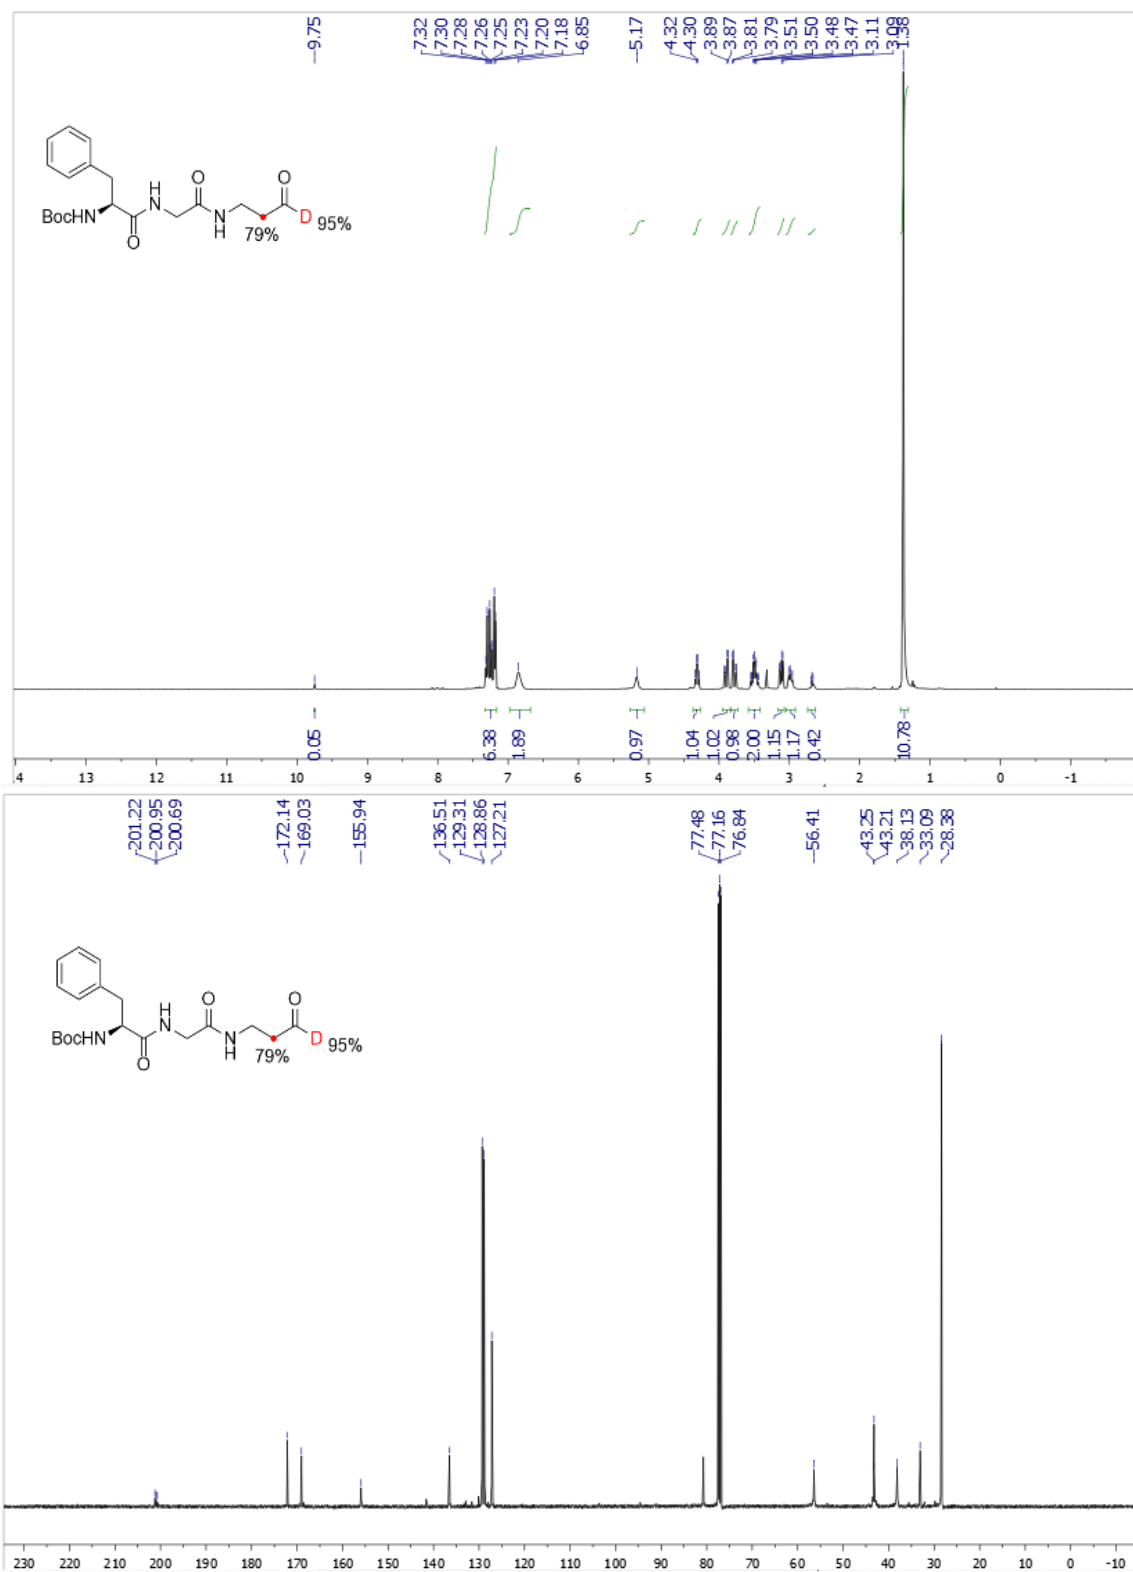



## Generic Display Report

### Analysis Info

Analysis Name: D:\Data\2019\_08\YZ-2758896\2758896\_YZ-12-67B\_00.d  
 Method: Tuning Mix.m  
 Sample Name: 2758896\_YZ-12-67B\_  
 Comment: dissolved in 400ul ACN, then diluted 1000x in ACN/H2O/0.1%FA

Acquisition Date: 8/14/2019 10:20:11 AM  
 Operator: KK  
 Instrument: amaZon SL

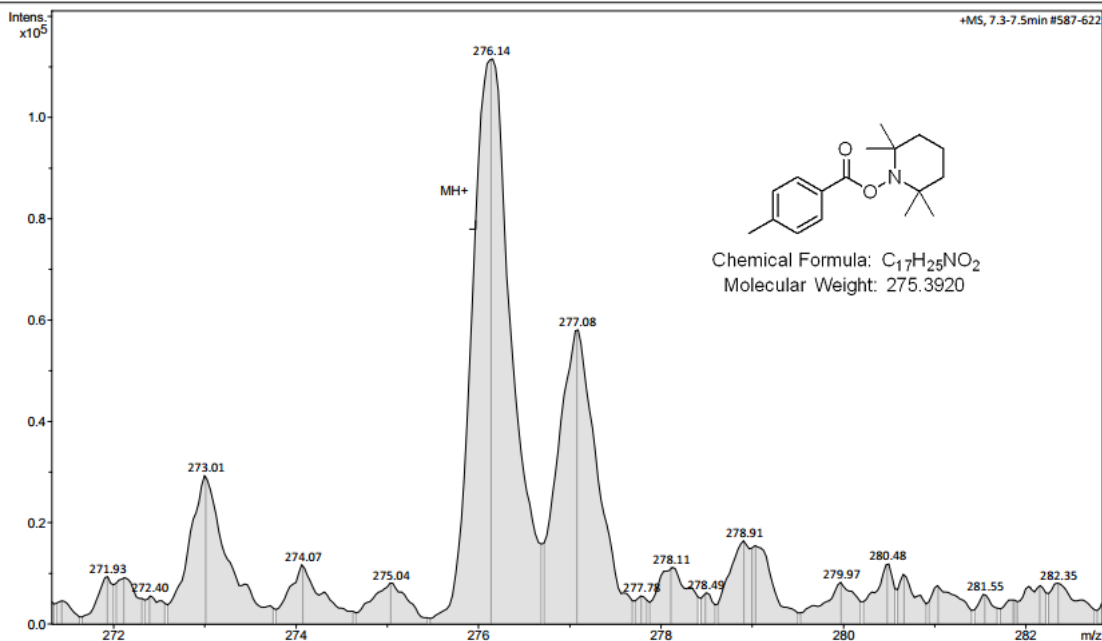

Bruker Compass DataAnalysis 4.2

printed: 8/14/2019 10:31:55 AM

by: kk

Page 1 of 1

## Generic Display Report

### Analysis Info

Analysis Name: D:\Data\2020\_01\YZ-3080350\YZ-3080350\_YZ-13-32P\_inACN\_only.d  
 Method: Tuning Mix.m  
 Sample Name: YZ-13-32P  
 Comment: 100x dil with ACN

Acquisition Date: 1/8/2020 10:57:36 AM  
 Operator: KK  
 Instrument: amaZon SL

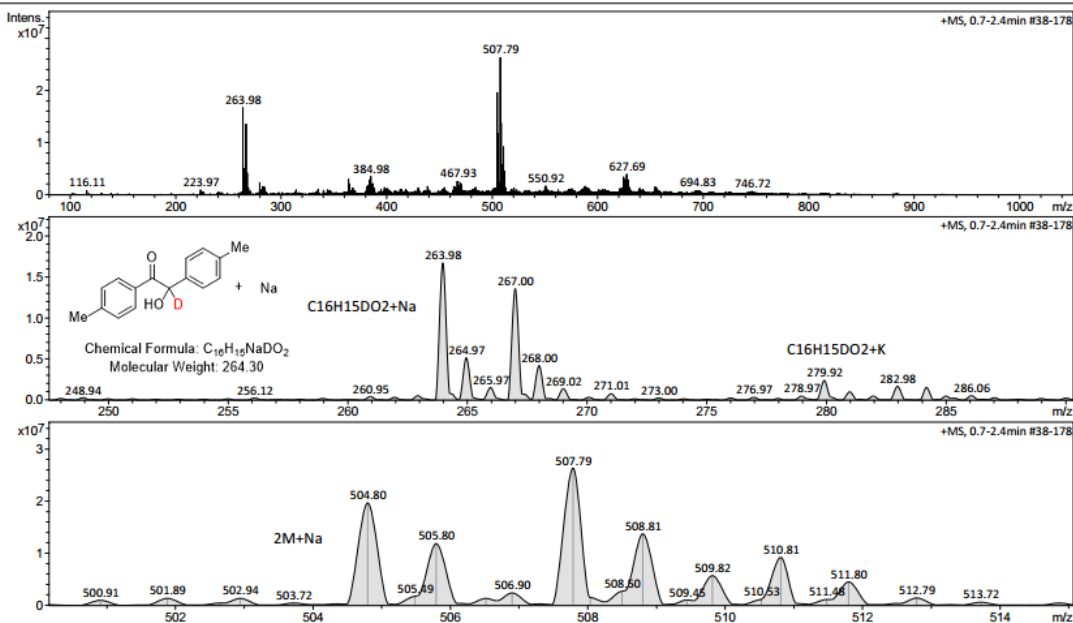

Bruker Compass DataAnalysis 4.2

printed: 1/8/2020 12:57:32 PM

by: KK

Page 1 of 1

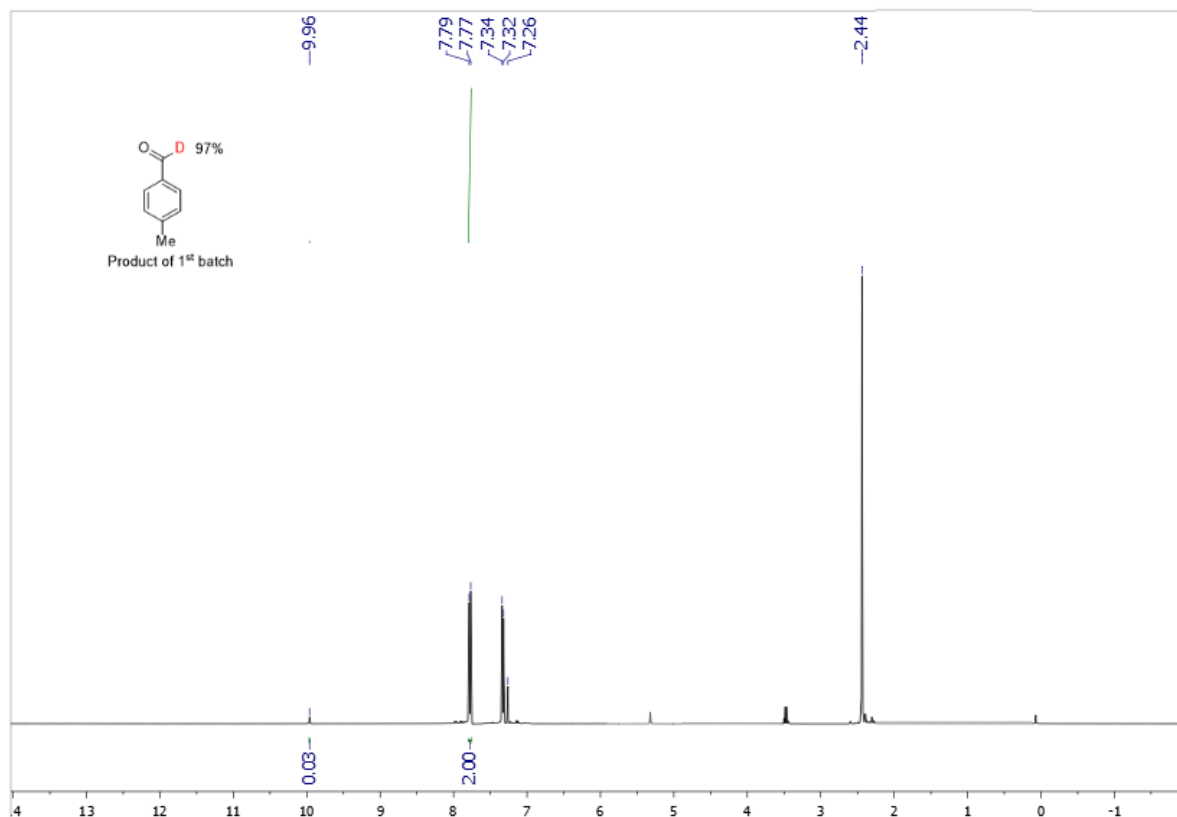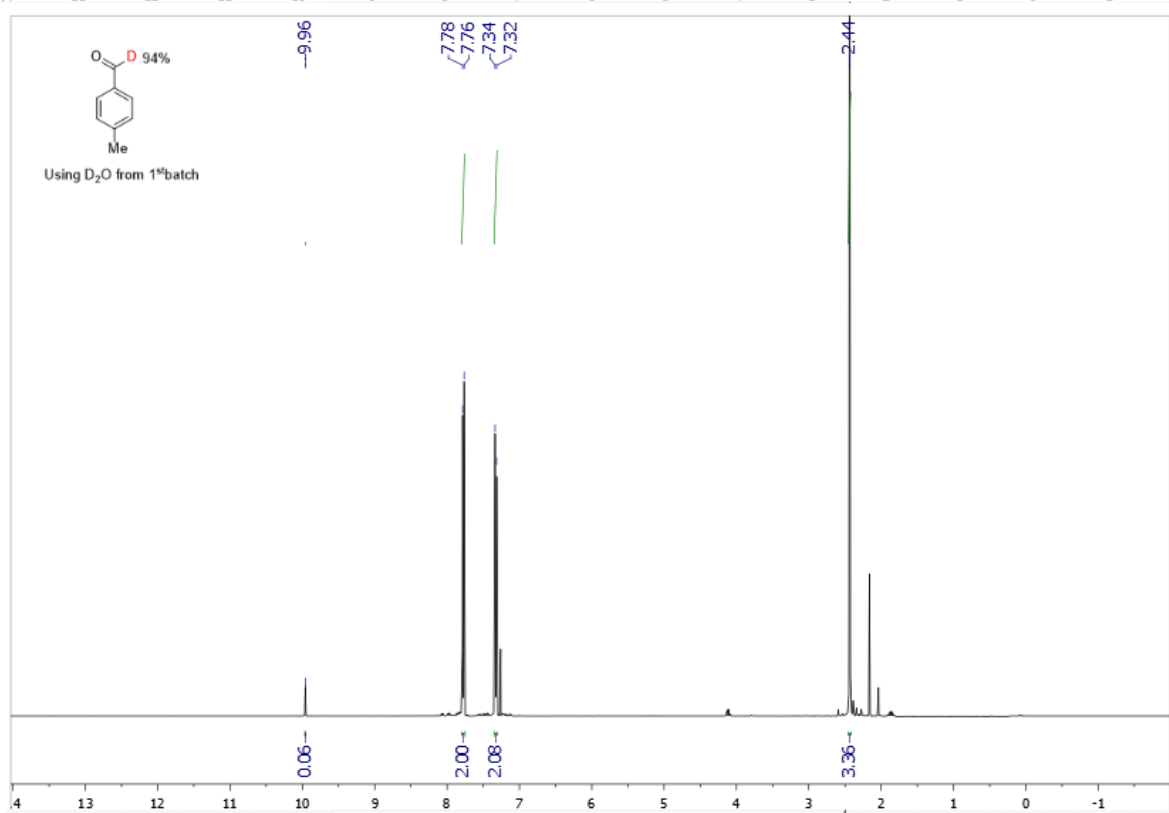

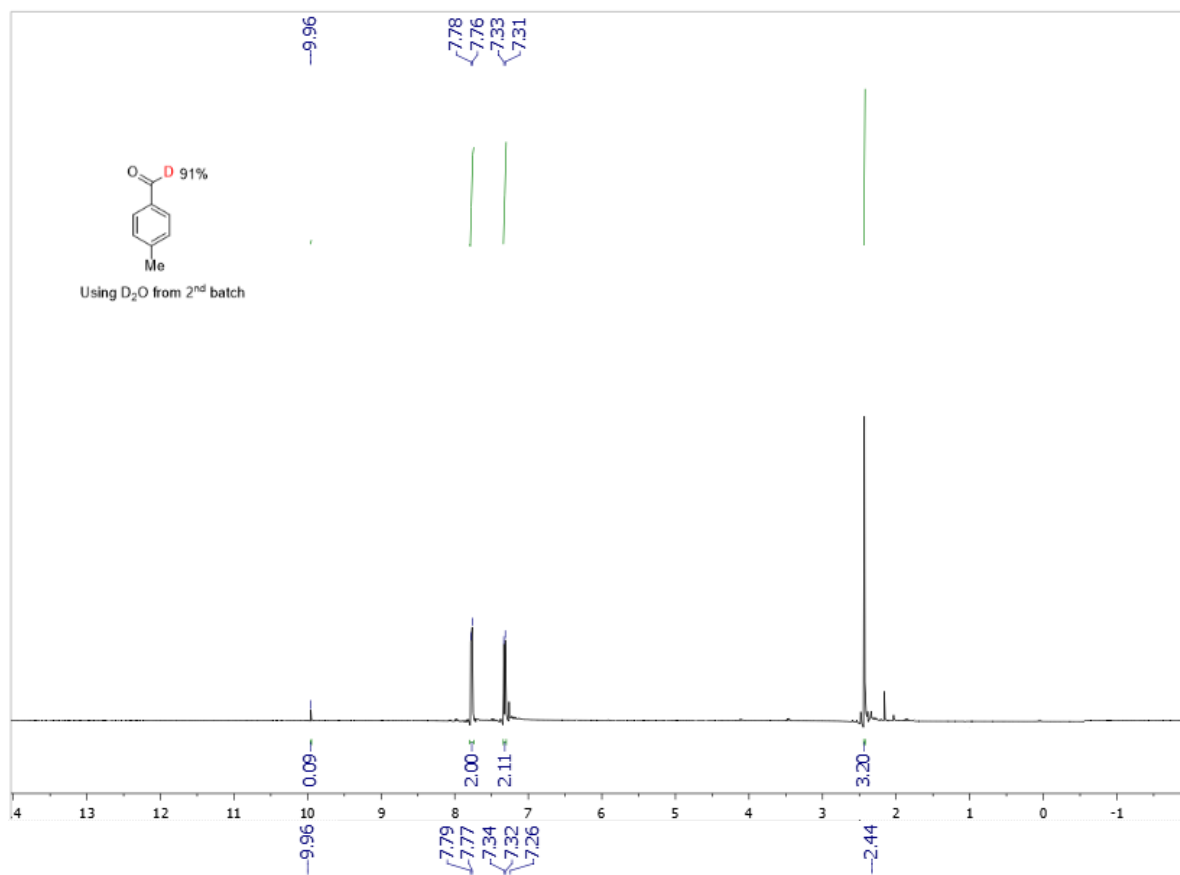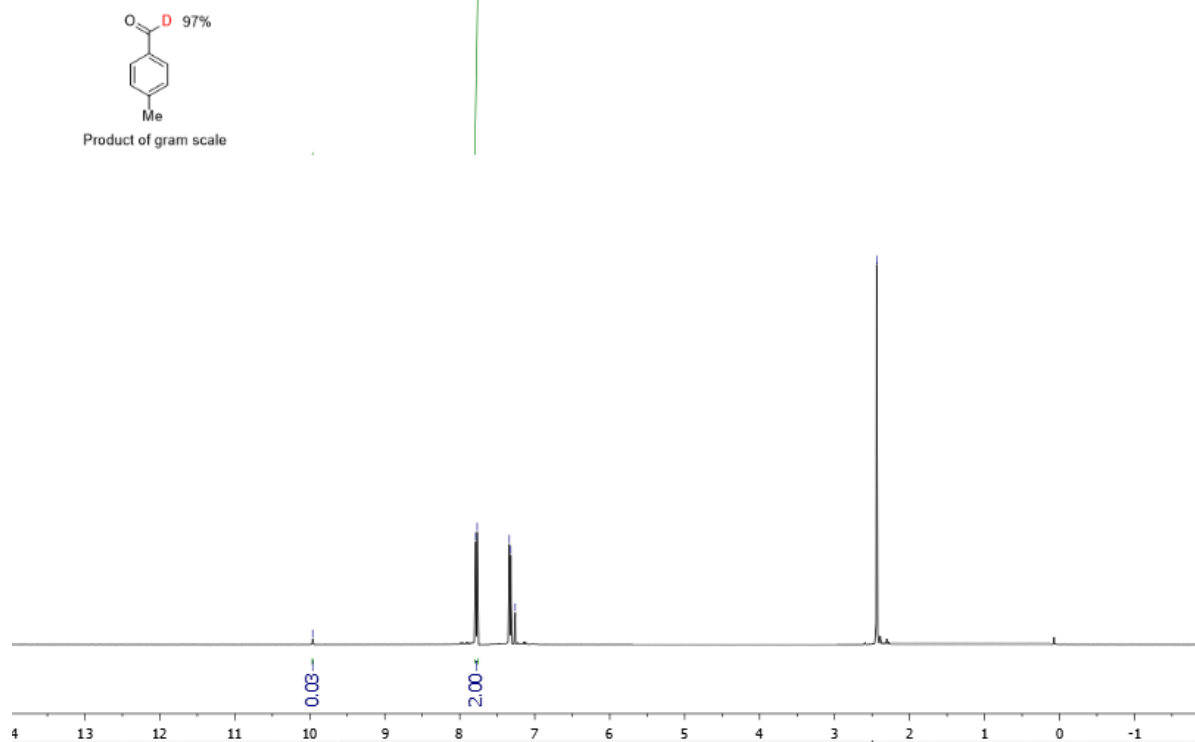

## 9. Reference

- (1) Huang, H.; Yu, C.; Zhang, Y.; Zhang, Y.; Mariano, P. S.; Wang, W. Chemo- and regioselective organophotoredox catalyzed hydroformylation of styrenes via a radical pathway. *J. Am. Chem. Soc.* **2017**, *139*, 9799-9802.
- (2) Frost, C. G.; Hartley, B. C. Tandem molybdenum catalyzed hydrosilylations: an expedient synthesis of  $\beta$ -aryl aldehydes. *Org. Lett.* **2007**, *9*, 4259-4261.
- (3) Ezzili, C.; Mileni, M.; McGlinchey, N.; Long, J. Z.; Kinsey, S. G.; Hochstatter, D. G.; Stevens, R. C.; Lichtman, A. H.; Cravatt, B. F.; Bilsky, E. J.; Boger, D. L. Reversible competitive  $\alpha$ -ketoheterocycle inhibitors of fatty acid amide hydrolase containing additional conformational constraints in the acyl side chain: orally active, long-acting analgesics. *J. Med. Chem.* **2011**, *54*, 2805-2822.
- (4) Kitajima, M.; Murakami, Y.; Takahashi, N.; Wu, Y.; Kogure, N.; Zhang, R. P.; Takayama, H. Asymmetric total synthesis of novel pentacyclic indole alkaloid, kopsiunnanine E, isolated from *Kopsia arborea*. *Org. Lett.* **2014**, *16*, 5000-5003.
- (5) Muthukrishnan, S.; Sankaranarayanan, J.; Klima, R. F.; Pace, T. C.; Bohne, C.; Gudmundsdottir, A. D. Intramolecular H-atom abstraction in  $\gamma$ -azido-butyrophenones: formation of 1,5 ketyl iminyl radicals. *Org. Lett.* **2009**, *11*, 2345-2348.
- (6) Colbon, P.; Ruan, J.; Purdie, M.; Mulholland, K.; Xiao, J. Double arylation of allyl alcohol via a one-pot Heck arylation–isomerization–acylation cascade. *Org. Lett.* **2011**, *13*, 5456-5459.
- (7) Shang, Y.; Jie, X.; Jonnada, K.; Zafar, S. N.; Su, W. Dehydrogenative desaturation-relay via formation of multicenter-stabilized radical intermediates. *Nat. Commun.* **2017**, *8*, 2273.
- (8) Ji, P.; Zhang, Y.; Wei, Y.; Huang, H.; Hu, W.; Mariano, P. A.; Wang, W. A visible light-mediated, chemo- and stereo-selective radical process for the synthesis of C-glycoamino acids. *Org. Lett.* **2019**, *21*, 3086-3092.
- (9) Xiao, J.; Wong, Z. Z.; Lu, Y. P.; Loh, T. P. Hexahydropyrrolo[2,3-*b*]indoles: A new class of structurally rigid tricyclic skeleton for oxazaborolidine-catalyzed asymmetric borane reduction. *Adv. Synth. Catal.* **2010**, *352*, 1107-1112.
- (10) Zhang, Y.; Ji, P.; Hu, W.; Wei, Y.; Huang, H.; Wang, W. Organocatalytic transformation of aldehydes to thioesters with visible light. *Chem. Eur. J.* **2019**, *25*, 8225-8228.
- (11) Hilpert, L. J.; Sieger, S. V.; Haydl, A. M.; Breit, B. Palladium- and rhodium-catalyzed dynamic kinetic resolution of racemic internal allenes towards chiral pyrazoles. *Angew. Chem. Int. Ed.* **2019**, *58*, 3378-3381.
- (12) Agy, A. C.; Rodrigues, M. T., Jr.; Zeoly, L. A.; Simoni, D. A.; Coelho, F. Palladium-mediated oxidative annulation of  $\delta$ -indolyl- $\alpha,\beta$ -unsaturated compounds toward the synthesis of cyclopenta[*b*]indoles and heterogeneous hydrogenation to access fused indolines. *J. Org. Chem.* **2019**, *84*, 5564-5581.
